# Supplementary material for: Asymmetric ring-opening reactions of donor–acceptor cyclopropanes with 1,3-cyclodiones
Source: Royal Society of Chemistry journal article supplement (doi:10.1039/d2ra08257h), 2023-01-01
Supplement: d2ra08257h1.pdf [file d2ra08257h1.pdf]

## Supporting Information

# Asymmetric Ring-opening Reactions of Donor–Acceptor Cyclopropanes with 1,3-Cyclodiones

Dongxin Zhang,<sup>\*</sup> Lvjia Chen, Huiqing Deng, Ying Zhang, Qihang Cheng, Qian-Feng Zhang<sup>\*</sup>  
Institute of Molecular Engineering and Applied Chemistry, Anhui University of Technology, No.  
59 Hudong Road, Ma'anshan, Anhui 243002, China  
*E-mails:* [dxzhang@ahut.edu.cn](mailto:dxzhang@ahut.edu.cn), [zhangqf@ahut.edu.cn](mailto:zhangqf@ahut.edu.cn)

|                                                                                      |     |
|--------------------------------------------------------------------------------------|-----|
| 1. General -----                                                                     | S2  |
| 2. General procedures for asymmetric ring-opening reactions to obtain <b>3</b> ----- | S2  |
| 3. Procedure for gram-scale synthesis of <b>3a</b> -----                             | S9  |
| 4. Reference -----                                                                   | S9  |
| 5. NMR spectra -----                                                                 | S10 |
| 6. HPLC chromatograms -----                                                          | S34 |

## 1. General

$^1\text{H}$  NMR and  $^{13}\text{C}$  NMR were recorded on a Bruker-400 MHz spectrometer. Proton chemical shifts are reported in ppm downfield from tetramethylsilane or from the residual solvent as internal standard in  $\text{CDCl}_3$  ( $\delta$  7.26 ppm) and in  $(\text{CD}_3)_2\text{SO}$  (2.50 ppm). Carbon chemical shifts were internally referenced to the deuterated solvent signals in  $\text{CDCl}_3$  ( $\delta$  77.0 ppm) and in  $(\text{CD}_3)_2\text{SO}$  (39.5 ppm). High-resolution mass spectra were recorded on a Thermo Scientific LTQ Orbitrap ESI ion trap mass spectrometer. Enantiomeric excesses were determined by chiral-phase HPLC using a Shimadzu LC-2030 plus instrument. Optical rotations were measured on an Autopol-VI polarimeter. Reagents obtained from commercial sources are used without further purification and all solvents were purified and dried according to standard methods prior to use, unless stated otherwise. **L4** Ligand was synthesized according to known procedures.<sup>1</sup>

## 2. General procedures for asymmetric ring-opening reactions to obtain **3**.

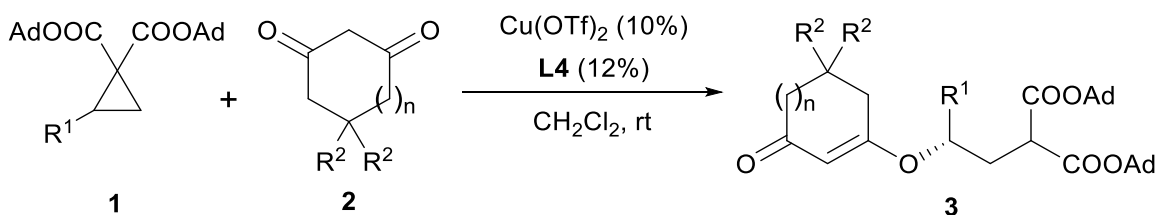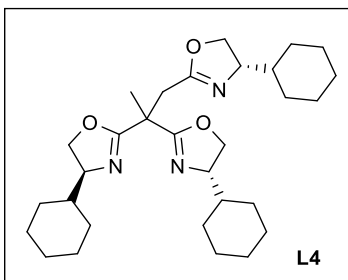

A mixture of  $\text{Cu}(\text{OTf})_2$  (0.02 mmol, 0.10 equiv) with **L4** (0.024 mmol, 0.12 equiv) in  $\text{CH}_2\text{Cl}_2$  at room temperature (25 °C) for 1 h. Then, the 1,1-cyclopropane diester (**1**, 0.20 mmol, 1.0 equiv.) and the 1,3-cyclodione (**2**, 0.40 mmol, 2.0 equiv.) were added to the mixture of catalyst successively. The resulting suspension was allowed to stir at room temperature (25 °C) for 50 h. Then, the solvent was removed in vacuo and the residue was purified by silica gel flash chromatography (petroleum ether:ethyl acetate = 12:1 to 2:1) to provide product **3**.

1,1-cyclopropane diester **1** are known compounds and the characterization data all corresponded to the reported values.<sup>1</sup>

**Di((3*R*,5*R*,7*R*)-adamantan-1-yl)2-((*S*)-2-(4-methoxyphenyl)-2-((3-oxocyclohex-1-en-1-yl)oxy)ethyl)malonate (3a)**

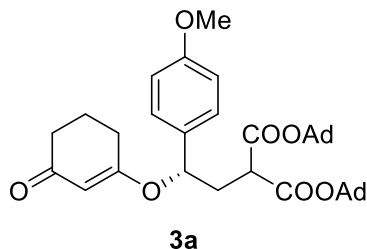

Synthesized according to the general procedure; flash chromatography (petroleum ether: ethyl acetate = 8:1 to 4:1); 104.8 mg (85%).

Colorless foam. 99% *ee*.  $[\alpha]_D^{26} = -7.9^\circ$  (c 1.10, CHCl<sub>3</sub>). <sup>1</sup>H NMR (400 MHz, CDCl<sub>3</sub>):  $\delta = 7.12$ -7.16 (m, 4H), 5.17 (s, 1H), 5.04 (dd, *J* = 8.8 Hz, 4.8 Hz, 1H), 4.98 (d, *J* = 3.2 Hz, 1H), 3.55 (dd, *J* = 8.4 Hz, 6.4 Hz, 1H), 2.35-2.56 (m, 4H), 2.32 (s, 3H), 2.25 (d, *J* = 5.2 Hz, 1H), 2.23 (d, *J* = 5.6 Hz, 1H), 1.92-1.99 (m, 10H), 1.72-1.83 (m, 16H), 1.54 (t, *J* = 10.3 Hz, 4H) ppm; <sup>13</sup>C{<sup>1</sup>H} NMR (100 MHz, CDCl<sub>3</sub>):  $\delta = 199.6, 176.2, 168.2, 168.18, 138.2, 135.9, 129.6, 125.6, 105.1, 78.5, 78.2, 49.5, 37.2, 37.1, 36.9, 36.5, 36.2, 36.16, 31.8, 31.77, 31.7, 31.6, 28.9, 27.0, 26.8, 21.1, 21.0$  ppm. IR (KBr.cm<sup>-1</sup>): 2909, 2855, 1725, 1650, 1605, 1514, 1449, 1386, 1248, 1172, 1099, 1044, 979, 896, 831; HRMS (ESI) *m/z*: [M + H]<sup>+</sup> Calcd. For C<sub>38</sub>H<sub>49</sub>O<sub>7</sub> 617.3473; Found 617.3476. HPLC (Daicel Chiralpak IB, hexane/2-PrOH = 95:5, 0.8 mL/min,  $\lambda = 254$  nm, 40 °C): *t*<sub>S</sub> (major, (*S*)-**3a**) = 10.8 min, *t*<sub>R</sub> (minor, (*R*)-**3a**) = 11.8 min.

**Di((3*R*,5*R*,7*R*)-adamantan-1-yl)2-((*S*)-2-(2-methoxyphenyl)-2-((3-oxocyclohex-1-en-1-yl)oxy)ethyl)malonate (3b)**

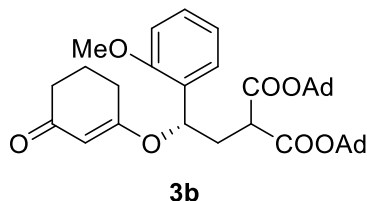

Synthesized according to the general procedure; flash chromatography (petroleum ether: ethyl acetate = 8:1 to 4:1); 87.6 mg (71%).

Colorless foam. 80% *ee*.  $[\alpha]_D^{26} = -8.2^\circ$  (c 1.05, CHCl<sub>3</sub>). <sup>1</sup>H NMR (400 MHz, CDCl<sub>3</sub>):  $\delta = 7.22$ -7.24 (m, 1H), 7.18 (dd, *J* = 7.6 Hz, 1.6 Hz, 1H), 6.92 (t, *J* = 7.6 Hz, 1H), 6.85 (d, *J* = 8.4 Hz, 1H), 5.54 (dd, *J* = 8.0 Hz, 4.8 Hz, 1H), 5.13 (s, 1H), 4.96 (d, *J* = 13.2 Hz, 2H), 3.82 (s, 3H), 3.58 (dd, *J* = 8.0 Hz, 6.8 Hz, 1H), 2.36-2.53 (m, 4H), 2.22-2.25 (m, 2H), 1.90-2.00 (m, 10H), 1.71-1.83 (m, 16H), 1.53 (d, *J* = 10.8 Hz, 4H) ppm; <sup>13</sup>C{<sup>1</sup>H} NMR (100 MHz, CDCl<sub>3</sub>):  $\delta = 199.7, 176.1, 168.3, 168.27, 155.6, 129.2, 127.0, 125.5, 120.9, 110.4, 104.7, 78.3, 78.2, 72.5, 55.3, 49.7, 37.2, 36.6, 36.2, 36.19, 36.16, 35.1, 31.8, 31.75, 31.7, 31.6, 29.6, 28.8, 27.1, 27.06, 26.8, 21.0$  ppm. HRMS (ESI) *m/z*: [M + H]<sup>+</sup> Calcd. For C<sub>38</sub>H<sub>49</sub>O<sub>7</sub> 617.3473; Found 617.3470. HPLC

(Daicel Chiralpak IA, hexane/2-PrOH = 80:20, 1.0 mL/min,  $\lambda = 254$  nm, 40 °C):  $t_S$  (major, (*S*)-**3b**) = 7.1 min,  $t_R$  (minor, (*R*)-**3b**) = 6.3 min.

**Di((3*R*,5*R*,7*R*)-adamantan-1-yl)2-((*S*)-2-(3-methoxyphenyl)-2-((3-oxocyclohex-1-en-1-yl)oxy)ethyl)malonate (**3c**)**

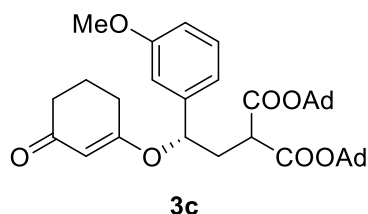

Synthesized according to the general procedure; flash chromatography (petroleum ether: ethyl acetate = 8:1 to 4:1); 102.3 mg (83%).

Colorless foam. 90% *ee*.  $[\alpha]_D^{26} = -8.0^\circ$  (c 1.05, CHCl<sub>3</sub>). <sup>1</sup>H NMR (400 MHz, CDCl<sub>3</sub>):  $\delta = 7.26$  (t,  $J = 8.0$  Hz, 1H), 6.8 (d,  $J = 2.8$  Hz, 1H), 6.81 (d,  $J = 2.4$  Hz, 1H), 6.77 (t,  $J = 1.6$  Hz, 1H), 5.17 (s, 1H), 5.05 (dd,  $J = 9.2$  Hz, 4.8 Hz, 1H), 4.98-5.00 (m, 2H), 3.80 (s, 3H), 3.57 (dd,  $J = 8.4$  Hz, 8.6 Hz, 1H), 2.37-2.55 (m, 4H), 2.26 (t,  $J = 6.8$  Hz, 2H), 1.93-2.00 (m, 10H), 1.72-1.88 (m, 16H), 1.52-1.55 (m, 4H) ppm; <sup>13</sup>C{<sup>1</sup>H} NMR (100 MHz, CDCl<sub>3</sub>):  $\delta = 199.5, 176.0, 168.2, 168.17, 160.0, 140.7, 130.1, 117.9, 113.5, 111.3, 105.2, 78.5, 78.2, 55.2, 49.5, 37.2, 37.16, 37.0, 36.6, 36.24, 36.2, 31.9, 31.8, 31.7, 31.66, 28.9, 27.1, 27.08, 26.8, 21.0$  ppm. HRMS (ESI)  $m/z$ : [M + H]<sup>+</sup> Calcd. For C<sub>38</sub>H<sub>49</sub>O<sub>7</sub> 617.3473; Found 617.3470. HPLC (Daicel Chiralpak IB, hexane/2-PrOH = 98:2, 1.0 mL/min,  $\lambda = 254$  nm, 40 °C):  $t_S$  (major, (*S*)-**3c**) = 30.9 min,  $t_R$  (minor, (*R*)-**3c**) = 34.5 min.

**Di((3*R*,5*R*,7*R*)-adamantan-1-yl)2-((*S*)-2-(4-(benzyloxy)phenyl)-2-((3-oxocyclohex-1-en-1-yl)oxy)ethyl)malonate (**3d**)**

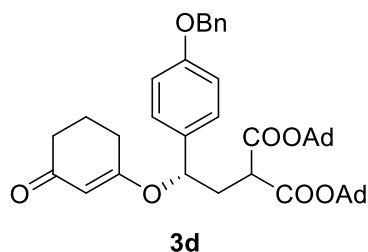

Synthesized according to the general procedure; flash chromatography (petroleum ether: ethyl acetate = 8:1 to 4:1); 120.6 mg (87%).

Colorless foam. 92% *ee*.  $[\alpha]_D^{26} = -7.7^\circ$  (c 1.00, CHCl<sub>3</sub>). <sup>1</sup>H NMR (400 MHz, CDCl<sub>3</sub>):  $\delta = 7.31$ -7.44 (m, 5H), 7.18 (d,  $J = 8.8$  Hz, 2H), 6.94 (d,  $J = 8.8$  Hz, 2H), 5.19 (s, 1H), 5.03-5.06 (m, 3H), 4.98 (s, 2H), 3.53 (dd,  $J = 8.8$  Hz, 6.4 Hz, 1H), 2.34-2.57 (m, 4H), 2.25 (dd,  $J = 8.0$  Hz, 6.0 Hz, 2H), 1.92-2.00 (m, 10H), 1.72-1.87 (m, 16H), 1.55 (t,  $J = 9.2$  Hz, 4H) ppm; <sup>13</sup>C{<sup>1</sup>H} NMR (100 MHz, CDCl<sub>3</sub>):  $\delta = 199.5, 176.1, 168.23, 168.2, 158.8, 136.7, 131.2, 128.6, 128.0, 127.5,$

127.1, 115.2, 105.1, 78.5, 78.0, 70.1, 49.5, 37.2, 37.16, 36.9, 36.6, 36.23, 36.2, 31.84, 31.8, 31.7, 31.69, 31.6, 29.0, 27.1, 26.83, 26.8, 21.0 ppm. HRMS (ESI)  $m/z$ :  $[M + H]^+$  Calcd. For  $C_{44}H_{53}O_7$  693.3786; Found 693.3791. HPLC (Daicel Chiralpak IB, hexane/2-PrOH = 95:5, 0.8 mL/min,  $\lambda$  = 254 nm, 40 °C):  $t_S$  (major, (S)-**3d**) = 21.2 min,  $t_R$  (minor, (R)-**3d**) = 23.5 min.

**Di((3R,5R,7R)-adamantan-1-yl)2-((S)-2-((3-oxocyclohex-1-en-1-yl)oxy)-2-phenylethyl)malonate (3e)**

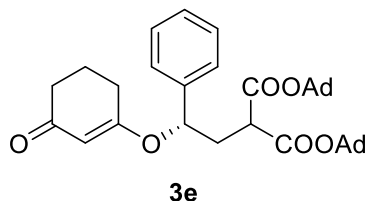

Synthesized according to the general procedure (100 h); flash chromatography (petroleum ether : ethyl acetate = 8:1 to 4:1); 92.6 mg (79%).

Colorless foam. 90% *ee*.  $[\alpha]_D^{26} = -6.6^\circ$  (c 1.05,  $CHCl_3$ ).  $^1H$  NMR (400 MHz,  $CDCl_3$ ):  $\delta$  = 7.28-7.37 (m, 3H), 7.25 (d,  $J$  = 6.8 Hz, 2H), 5.17 (s, 1H), 5.08 (dd,  $J$  = 9.2 Hz, 4.4 Hz, 1H), 4.98-5.00 (m, 2H), 3.57 (dd,  $J$  = 8.4 Hz, 6.0 Hz, 1H), 2.39-2.57 (m, 4H), 2.26 (d,  $J$  = 6.0 Hz, 1H), 2.24 (d,  $J$  = 5.6 Hz, 1H), 1.92-2.00 (m, 10H), 1.72-1.88 (m, 16H), 1.52-1.57 (m, 4H) ppm;  $^{13}C\{^1H\}$  NMR (100 MHz,  $CDCl_3$ ):  $\delta$  = 199.5, 176.1, 168.2, 168.17, 139.0, 129.0, 128.4, 125.6, 105.2, 78.5, 78.3, 49.5, 37.20, 37.17, 37.0, 36.6, 36.24, 36.2, 31.9, 31.85, 31.8, 31.7, 31.6, 28.9, 27.1, 27.07, 26.84, 26.8, 21.0 ppm. HRMS (ESI)  $m/z$ :  $[M + H]^+$  Calcd. For  $C_{37}H_{47}O_6$  587.3367; Found 587.3370. HPLC (Daicel Chiralpak IA, hexane/2-PrOH = 95:5, 1.0 mL/min,  $\lambda$  = 254 nm, 40 °C):  $t_S$  (major, (S)-**3e**) = 11.5 min,  $t_R$  (minor, (R)-**3e**) = 12.5 min.

**Di((3R,5R,7R)-adamantan-1-yl)2-((S)-2-(4-chlorophenyl)-2-((3-oxocyclohex-1-en-1-yl)oxy)ethyl)malonate (3f)**

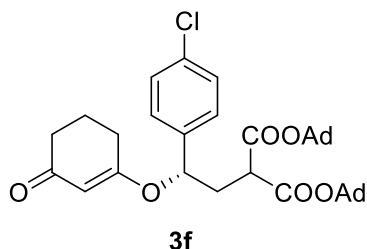

Synthesized according to the general procedure (100 h); flash chromatography (petroleum ether : ethyl acetate = 8:1 to 2:1); 87.0 mg (70%).

Colorless foam. 94% *ee*.  $[\alpha]_D^{26} = -9.2^\circ$  (c 1.10,  $CHCl_3$ ).  $^1H$  NMR (400 MHz,  $CDCl_3$ ):  $\delta$  = 7.31 (d,  $J$  = 8.4 Hz, 2H), 7.18 (d,  $J$  = 8.8 Hz, 2H), 5.10 (s, 1H), 5.06 (dd,  $J$  = 9.2 Hz, 4.8 Hz, 1H), 4.96-4.98 (m, 2H), 3.53 (dd,  $J$  = 8.4 Hz, 6.0 Hz, 1H), 2.35-2.52 (m, 4H), 2.22-2.26 (m, 2H), 1.90-1.98 (m, 10H), 1.71-1.86 (m, 16H), 1.51-1.56 (m, 4H) ppm;  $^{13}C\{^1H\}$  NMR (100 MHz,  $CDCl_3$ ):  $\delta$  = 199.3, 175.8, 175.7, 168.0, 137.5, 134.2, 129.2, 127.0, 105.1, 78.6, 77.5, 49.3, 37.1,

37.08, 36.8, 36.5, 36.2, 36.1, 31.8, 31.78, 31.75, 31.6, 31.58, 28.8, 27.02, 27.0, 26.8, 26.75, 20.9 ppm. IR (KBr.cm<sup>-1</sup>): 2915, 2850, 1738, 1720, 1650, 1608, 1490, 1237, 1217, 1183, 977, 828, 718, 666, 588; HRMS (ESI) m/z: [M + H]<sup>+</sup> Calcd. For C<sub>37</sub>H<sub>46</sub>ClO<sub>6</sub> 621.2977; Found 621.2975. HPLC (Daicel Chiralpak IB, hexane/2-PrOH = 95:5, 0.8 mL/min, λ = 254 nm, 40 °C): t<sub>S</sub> (major, (S)-**3f**) = 11.4 min, t<sub>R</sub> (minor, (R)-**3f**) = 12.6 min.

**Di((3*R*,5*R*,7*R*)-adamantan-1-yl)2-((*S*)-2-((3-oxocyclohex-1-en-1-yl)oxy)-2-(thiophen-2-yl)ethyl)malonate (**3g**)**

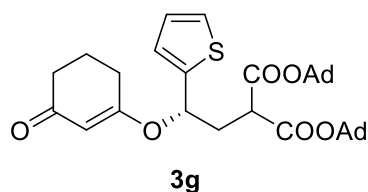

Synthesized according to the general procedure; flash chromatography (petroleum ether : ethyl acetate = 8:1 to 2:1); 104.3 mg (88%).

Colorless foam. 93% *ee*. [α]<sub>D</sub><sup>26</sup> = - 4.3° (c 1.10, CHCl<sub>3</sub>). <sup>1</sup>H NMR (400 MHz, CDCl<sub>3</sub>): δ = 7.26-7.27 (m, 1H), 6.99 (dd, *J* = 3.2 Hz, 0.4 Hz, 1H), 6.94 (dd, *J* = 4.8 Hz, 3.6 Hz, 1H), 5.39 (dd, *J* = 8.4 Hz, 5.2 Hz, 1H), 5.35 (s, 1H), 4.98 (d, *J* = 2.8 Hz, 2H), 3.52 (dd, *J* = 7.6 Hz, 6.8 Hz, 1H), 2.62-2.69 (m, 1H), 2.31-2.53 (m, 3H), 2.28-2.28 (m, 2H), 1.92-1.99 (m, 10H), 1.71-1.83 (m, 16H), 1.52-1.56 (m, 4H) ppm; <sup>13</sup>C{<sup>1</sup>H} NMR (100 MHz, CDCl<sub>3</sub>): δ = 199.4, 175.8, 168.0, 167.9, 141.8, 125.8, 125.9, 125.7, 104.6, 78.6, 73.9, 49.3, 37.2, 37.1, 36.5, 36.2, 36.15, 31.8, 31.79, 31.7, 31.66, 31.6, 28.9, 27.0, 26.8, 26.77, 21.0 ppm. HRMS (ESI) m/z: [M + H]<sup>+</sup> Calcd. For C<sub>35</sub>H<sub>45</sub>O<sub>6</sub>S 593.2931; Found 593.2932. HPLC (Daicel Chiralpak IB, hexane/2-PrOH = 95:5, 0.8 mL/min, λ = 254 nm, 40 °C): t<sub>S</sub> (major, (S)-**3g**) = 9.3 min, t<sub>R</sub> (minor, (R)-**3g**) = 10.8 min.

**Di((3*R*,5*R*,7*R*)-adamantan-1-yl)2-((*S*)-2-(1-(tert-butoxycarbonyl)-1*H*-indol-3-yl)-2-((3-oxocyclohex-1-en-1-yl)oxy)ethyl)malonate (**3h**)**

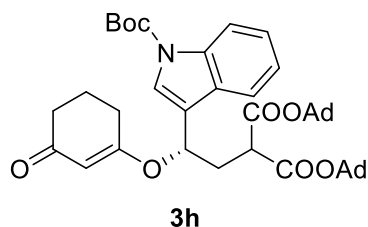

Synthesized according to the general procedure; flash chromatography (petroleum ether : ethyl acetate = 10:1 to 4:1); 120.5 mg (83%).

Colorless foam. 91% *ee*. [α]<sub>D</sub><sup>26</sup> = - 9.9° (c 0.95, CHCl<sub>3</sub>). <sup>1</sup>H NMR (400 MHz, CDCl<sub>3</sub>): δ = 8.13 (d, *J* = 6.0 Hz, 1H), 7.65 (d, *J* = 8.0 Hz, 1H), 7.50 (s, 1H), 7.33 (td, *J* = 7.2 Hz, 1.2 Hz, 1H), 7.23 (td, *J* = 8.0 Hz, 0.8 Hz, 1H), 5.40 (dd, *J* = 8.8 Hz, 4.8 Hz, 1H), 5.34 (m, 1H), 4.99 (d, *J* = 4.0 Hz, 2H), 3.61 (dd, *J* = 8.4 Hz, 6.4 Hz, 1H), 2.71-2.78 (m, 1H), 2.37-2.62 (m, 3H), 2.23-2.27 (m, 2H), 1.92-1.99 (m, 10H), 1.72-1.86 (m, 16H), 1.67 (s, 9H), 1.53-1.56 (m, 4H) ppm; <sup>13</sup>C{<sup>1</sup>H} NMR

(100 MHz, CDCl<sub>3</sub>):  $\delta$  = 199.7, 176.2, 168.2, 149.3, 127.4, 124.9, 123.5, 122.9, 119.6, 118.0, 115.5, 104.4, 84.2, 78.6, 78.56, 72.9, 49.4, 37.14, 37.1, 36.5, 36.2, 36.15, 35.2, 31.8, 31.78, 31.7, 31.65, 31.6, 28.9, 28.1, 27.04, 27.0, 26.8, 21.0 ppm. HRMS (ESI)  $m/z$ : [M + H]<sup>+</sup> Calcd. For C<sub>44</sub>H<sub>56</sub>NO<sub>8</sub> 726.4000; Found 726.3996. HPLC (Daicel Chiralpak IB, hexane/2-PrOH = 98:2, 0.8 mL/min,  $\lambda$  = 254 nm, 40 °C):  $t_S$  (major, (*S*)-**3h**) = 12.6 min,  $t_R$  (minor, (*R*)-**3h**) = 14.8 min.

**Di((3*R*,5*R*,7*R*)-adamantan-1-yl)2-((*S*)-2-(4-methoxyphenyl)-2-((3-oxocyclopent-1-en-1-yl)oxy)ethyl)malonate (**3i**)**

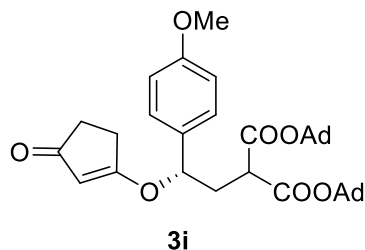

Synthesized according to the general procedure (100 h); flash chromatography (petroleum ether : ethyl acetate = 8:1 to 4:1); 97.6 mg (81%).

Colorless foam. 95% *ee*.  $[\alpha]_D^{26} = -7.3^\circ$  (c 1.10, CHCl<sub>3</sub>). <sup>1</sup>H NMR (400 MHz, CDCl<sub>3</sub>):  $\delta$  = 8.13 (d,  $J$  = 6.0 Hz, 1H), 7.65 (d,  $J$  = 7.8 Hz, 1H), 7.50 (s, 1H), 7.31-7.35 (m, 1H), 7.21-7.25 (m, 1H), 6.39 (dd,  $J$  = 4.9 Hz, 9.0 Hz, 1H), 5.34 (s, 1H), 4.98 (d,  $J$  = 4.0 Hz, 1H), 3.61 (dd,  $J$  = 6.4 Hz, 8.4 Hz, 1H), 2.71-2.78 (m, 1H), 2.40-2.62 (m, 3H), 2.23-2.27 (m, 2H), 1.92-1.99 (m, 10H), 1.71-1.86 (m, 16H), 1.67 (s, 9H), 1.53-1.56 (m, 4H) ppm; <sup>13</sup>C{<sup>1</sup>H} NMR (100 MHz, CDCl<sub>3</sub>):  $\delta$  = 205.7, 188.4, 168.1, 168.08, 159.8, 130.3, 127.3, 114.4, 106.9, 81.7, 78.6, 55.3, 49.4, 37.15, 37.1, 36.5, 36.2, 33.7, 31.8, 31.76, 31.7, 31.68, 31.6, 31.58, 28.6, 27.0, 26.8, 26.78 ppm. HRMS (ESI)  $m/z$ : [M + H]<sup>+</sup> Calcd. For C<sub>37</sub>H<sub>47</sub>O<sub>7</sub> 603.3316; Found 603.3315. HPLC (Daicel Chiralpak IB, hexane/2-PrOH = 98:2, 0.8 mL/min,  $\lambda$  = 254 nm, 40 °C):  $t_S$  (major, (*S*)-**3i**) = 18.5 min,  $t_R$  (minor, (*R*)-**3i**) = 20.6 min.

**Di((3*R*,5*R*,7*R*)-adamantan-1-yl)2-((*S*)-2-((5,5-dimethyl-3-oxocyclohex-1-en-1-yl)oxy)-2-(4-methoxyphenyl)ethyl)malonate (**3j**)**

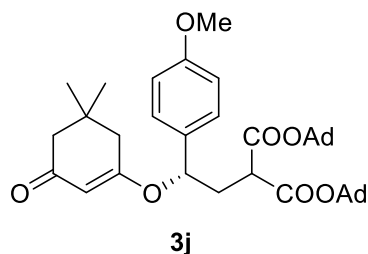

Synthesized according to the general procedure; flash chromatography (petroleum ether : ethyl acetate = 12:1 to 6:1); 117.3 mg (91%).

Colorless solid, m.p. 135-137 °C. 95% *ee*.  $[\alpha]_D^{26} = -8.9^\circ$  (c 1.10, CHCl<sub>3</sub>). <sup>1</sup>H NMR (400 MHz, CDCl<sub>3</sub>):  $\delta = 7.14$  (d, *J* = 8.8 Hz, 2H), 6.83 (d, *J* = 8.8 Hz, 2H), 5.13 (s, 1H), 5.02 (dd, *J* = 8.4 Hz, 4.8 Hz, 1H), 4.95 (s, 2H), 3.75 (s, 3H), 3.49 (dd, *J* = 8.4 Hz, 6.4 Hz, 1H), 2.46-2.53 (m, 1H), 2.34-2.41 (m, 1H), 2.20-2.30 (m, 2H), 2.08 (d, *J* = 2.8 Hz, 2H), 1.89-1.97 (m, 8H), 1.69-1.84 (m, 16H), 1.51 (t, *J* = 10.0 Hz, 4H), 1.03 (s, 3H), 0.96 (s, 3H) ppm; <sup>13</sup>C{<sup>1</sup>H} NMR (100 MHz, CDCl<sub>3</sub>):  $\delta = 199.2, 174.4, 168.2, 168.1, 130.9, 126.9, 114.3, 103.9, 78.4, 78.0, 55.2, 50.5, 49.4, 42.9, 37.12, 37.1, 36.9, 36.2, 36.1, 32.3, 31.8, 31.7, 31.6, 31.58, 28.3, 27.9, 27.0, 26.8$  ppm. IR (KBr.cm<sup>-1</sup>): 2928, 2852, 1723, 1650, 1600, 1519, 1449, 1373, 1248, 1214, 1177, 1034, 911, 825, 619, 578; HRMS (ESI) *m/z*: [M + H]<sup>+</sup> Calcd. For C<sub>40</sub>H<sub>53</sub>O<sub>7</sub> 645.3786; Found 645.3788. HPLC (Daicel Chiralpak IA, hexane/2-PrOH = 80:20, 1.0 mL/min,  $\lambda = 254$  nm, 40 °C): *t*<sub>S</sub> (major, (*S*)-**3j**) = 8.8 min, *t*<sub>R</sub> (minor, (*R*)-**3j**) = 9.4 min.

**Di((3*R*,5*R*,7*R*)-adamantan-1-yl)2-((*S*)-2-((5,5-dimethyl-3-oxocyclohex-1-en-1-yl)oxy)-2-(thiophen-2-yl)ethyl)malonate (**3k**)**

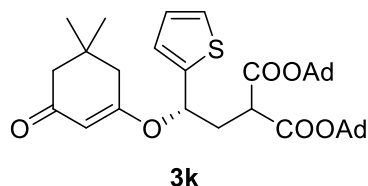

Synthesized according the general procedure; flash chromatography (petroleum ether : ethyl acetate = 8:1 to 2:1); 115.4 mg (93%).

Colorless foam. 79% *ee*.  $[\alpha]_D^{26} = -6.4^\circ$  (c 1.00, CHCl<sub>3</sub>). <sup>1</sup>H NMR (400 MHz, CDCl<sub>3</sub>):  $\delta = 7.26$  (dd, *J* = 4.8 Hz, 0.8 Hz, 1H), 6.98 (d, *J* = 2.8 Hz, 1H), 6.94 (dd, *J* = 4.8 Hz, 3.6 Hz, 1H), 5.42 (dd, *J* = 8.4 Hz, 5.2 Hz, 1H), 5.33 (s, 1H), 4.98 (d, *J* = 2.8 Hz, 2H), 3.52 (dd, *J* = 8.0 Hz, 7.2 Hz, 1H), 2.60-2.68 (m, 1H), 2.46-2.53 (m, 1H), 2.31-2.35 (m, 1H), 2.13-2.25 (m, 3H), 1.92-2.03 (m, 8H), 1.72-1.83 (m, 16H), 1.54 (t, *J* = 9.6 Hz, 4H), 1.54 (s, 3H), 0.99 (s, 3H) ppm; <sup>13</sup>C{<sup>1</sup>H} NMR (100 MHz, CDCl<sub>3</sub>):  $\delta = 199.3, 174.1, 168.0, 167.97, 141.9, 126.8, 125.8, 125.6, 103.6, 78.63, 78.6, 74.1, 50.6, 49.3, 42.8, 37.2, 37.18, 37.15, 36.2, 36.18, 32.4, 31.8, 31.78, 31.7, 31.6, 28.4, 27.9, 27.1, 26.83, 26.8$  ppm. HRMS (ESI) *m/z*: [M + H]<sup>+</sup> Calcd. For C<sub>37</sub>H<sub>49</sub>O<sub>6</sub>S 621.3244; Found 621.3246. HPLC (Daicel Chiralpak IB, hexane/2-PrOH = 95:5, 0.8 mL/min,  $\lambda = 254$  nm, 40 °C): *t*<sub>S</sub> (major, (*S*)-**3k**) = 12.1 min, *t*<sub>R</sub> (minor, (*R*)-**3k**) = 14.0 min.

**Di((3*R*,5*R*,7*R*)-adamantan-1-yl)2-((*S*)-2-(1-(tert-butoxycarbonyl)-1*H*-indol-3-yl)-2-((5,5-dimethyl-3-oxocyclohex-1-en-1-yl)oxy)ethyl)malonate (**3l**)**

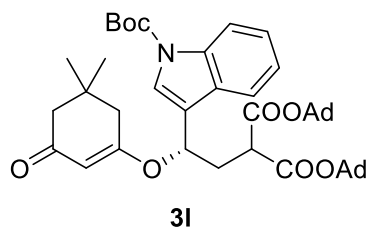



Synthesized according to the general procedure; flash chromatography (petroleum ether : ethyl acetate = 8:1 to 4:1); 131.1 mg (87%).

Colorless foam. 94% *ee*.  $[\alpha]_{\text{D}}^{26} = -10.1^{\circ}$  (c 1.05,  $\text{CHCl}_3$ ).  $^1\text{H}$  NMR (400 MHz,  $\text{CDCl}_3$ ):  $\delta = 8.14$  (dd,  $J = 8.0$  Hz, 1H), 7.63 (d,  $J = 3.6$  Hz, 1H), 7.47 (m, 1H), 7.32 (td,  $J = 7.2$  Hz, 1.2 Hz, 1H), 7.22 (td,  $J = 8.0$  Hz, 0.8 Hz, 1H), 5.37 (dd,  $J = 8.8$  Hz, 4.8 Hz, 1H), 5.31 (m, 1H), 4.99 (t,  $J = 3.6$  Hz, 1H), 3.61 (dd,  $J = 8.4$  Hz, 6.4 Hz, 1H), 2.68-2.75 (m, 1H), 2.57-2.64 (m, 1H), 2.25-2.40 (m, 2H), 2.11 (d,  $J = 5.2$  Hz, 2H), 1.92-2.00 (m, 8H), 1.72-1.83 (m, 16H), 1.66 (m, 9H), 1.51-1.55 (m, 4H), 1.07 (m, 3H), 0.95 (m, 3H) ppm;  $^{13}\text{C}\{^1\text{H}\}$  NMR (100 MHz,  $\text{CDCl}_3$ ):  $\delta = 199.5, 174.5, 168.2, 168.17, 149.3, 135.8, 127.3, 124.9, 123.3, 122.9, 119.5, 118.0, 115.5, 103.4, 84.1, 78.6, 78.58, 73.0, 50.5, 49.4, 42.8, 37.2, 37.1, 36.2, 36.19, 35.2, 32.4, 31.84, 31.8, 31.76, 31.7, 31.67, 31.6, 28.4, 28.1, 27.9, 27.1, 27.0, 26.8$  ppm. HRMS (ESI)  $m/z$ :  $[\text{M} + \text{H}]^+$  Calcd. For  $\text{C}_{46}\text{H}_{60}\text{NO}_8$  754.4313; Found 754.4310. HPLC (Daicel Chiralpak IB, hexane/2-PrOH = 95:5, 0.8 mL/min,  $\lambda = 254$  nm, 40  $^{\circ}\text{C}$ ):  $t_{\text{S}}$  (major, (*S*)-**3I**) = 10.8 min,  $t_{\text{R}}$  (minor, (*R*)-**3I**) = 12.3 min.

### 3. Procedure for gram-scale synthesis of **3a**.

A mixture of  $\text{Cu}(\text{OTf})_2$  (107.4 mg, 0.297 mmol, 0.10 equiv.) with **L4** (177.4 mg, 0.356 mmol, 0.12 equiv.) in  $\text{CH}_2\text{Cl}_2$  at room temperature (25  $^{\circ}\text{C}$ ) for 2 h. Then, the 1,1-cyclopropane diester (**1**, 1.50 g, 2.97 mmol, 1.0 equiv.) and the 1,3-cyclodione (**2**, 666.0 mg, 5.94 mmol, 2.0 equiv.) were added to the mixture of catalyst successively. The resulting solution was allowed to stir at room temperature (25  $^{\circ}\text{C}$ ) for 100 h. Then, the mixture was diluted with  $\text{CH}_2\text{Cl}_2$  (25.0 mL) and washed with saturated  $\text{NaHCO}_3$ . The aqueous phase was extracted with  $\text{CH}_2\text{Cl}_2$  (25 mL  $\times$  3). The organic layers were combined, washed with brine, dried over  $\text{Na}_2\text{SO}_4$ , and concentrated. The residue was purified by silica gel flash chromatography (petroleum ether:ethyl acetate = 12:1 to 2:1) to provide product **3a** (1.50 g, 82% yield, 99% *ee*).

### 4. Reference

1. Q.-K. Kang, L.-J. Wang, Q.-Z. Liu, Z.-F. Li and Y. Tang, *J. Am. Chem. Soc.*, 2015, 137, 14594-14597.

7.260  
7.161  
7.138  
7.116  
5.167  
5.057  
5.045  
5.035  
5.023  
4.982  
4.974  
3.565  
3.549  
3.544  
3.528  
2.525  
2.510  
2.503  
2.487  
2.469  
2.452  
2.438  
2.427  
2.417  
2.411  
2.406  
2.395  
2.381  
2.369  
2.323  
2.259  
2.246  
2.241  
2.227  
1.995  
1.966  
1.945  
1.920  
1.833  
1.770  
1.718  
1.564  
1.539  
1.512

Current Data Parameters  
 NAME yl-133 rep3  
 EXPNO 2019122401  
 PROCNO 1

F2 - Acquisition Parameters  
 Date\_ 20191224  
 Time 19.11  
 INSTRUM spect  
 PROBHD 5 mm PABBO BB-  
 PULPROG zg30  
 TD 65536  
 SOLVENT CDCl3  
 NS 16  
 DS 2  
 SWH 8223.685 Hz  
 FIDRES 0.125483 Hz  
 AQ 3.9845889 sec  
 RG 114  
 DW 60.800 usec  
 DE 6.50 usec  
 TE 291.8 K  
 D1 1.00000000 sec  
 TD0 1

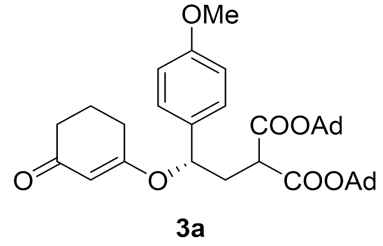

==== CHANNEL f1 =====  
 NUC1 1H  
 P1 14.80 usec  
 PL1 -1.00 dB  
 PL1W 10.90985775 W  
 SFO1 400.1724712 MHz

F2 - Processing parameters  
 SI 32768  
 SF 400.1700160 MHz  
 WDW EM  
 SSB 0  
 LB 0.30 Hz  
 GB 0  
 PC 1.00

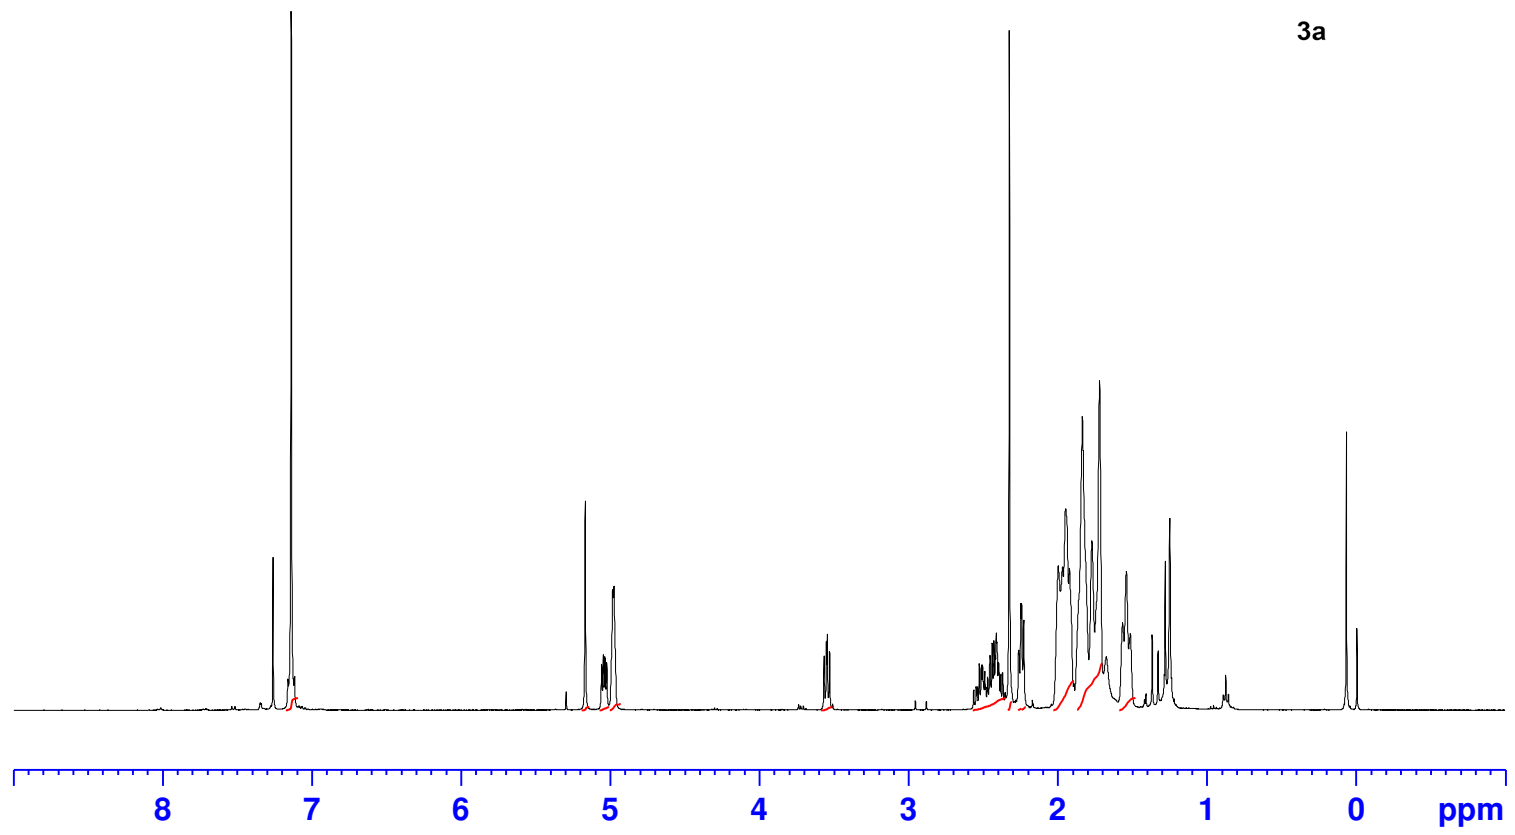

4.06  
1.00  
1.01  
2.04  
1.00  
4.09  
2.93  
0.90  
1.01  
10.10  
16.11  
4.22

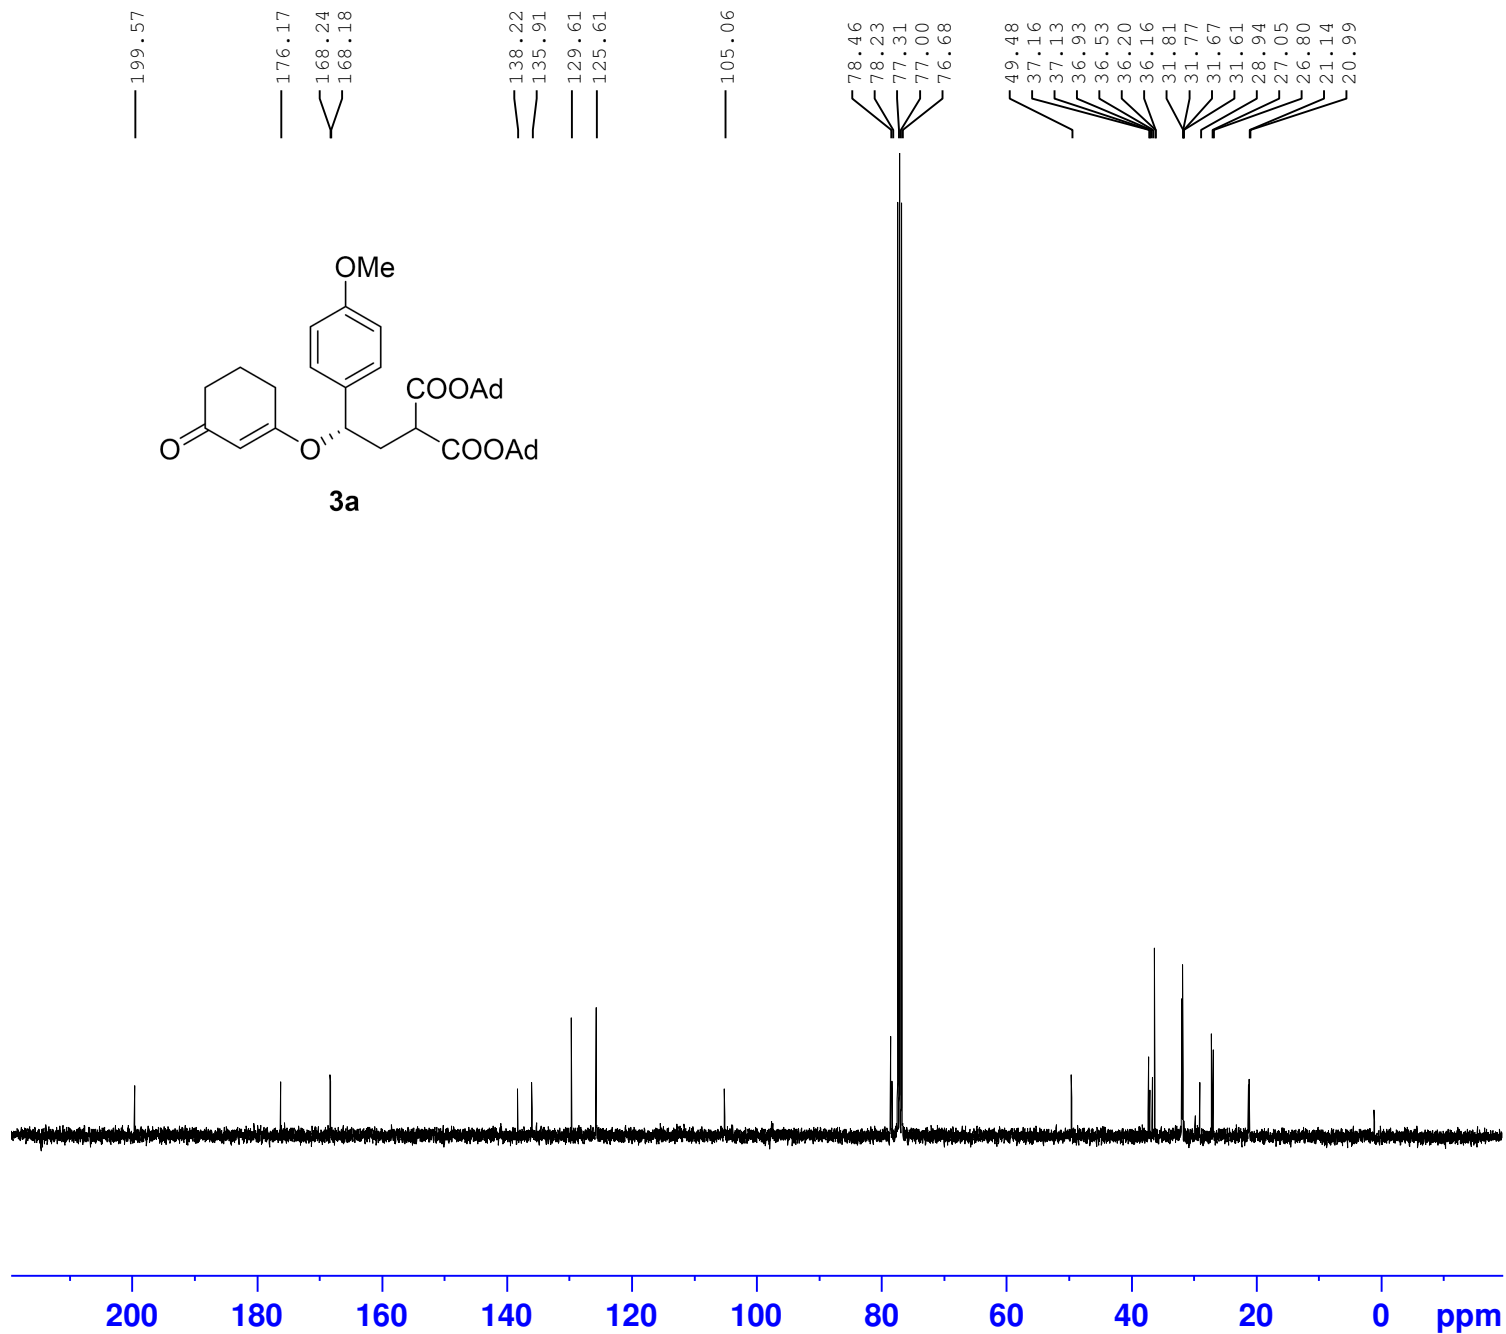

Current Data Parameters  
 NAME yl-133 rep3  
 EXPNO 2019122402  
 PROCNO 1

F2 - Acquisition Parameters  
 Date\_ 20191224  
 Time 19.14  
 INSTRUM spect  
 PROBHD 5 mm PABBO BB-  
 PULPROG zgpg30  
 TD 65536  
 SOLVENT CDC13  
 NS 199  
 DS 4  
 SWH 24038.461 Hz  
 FIDRES 0.366798 Hz  
 AQ 1.3631488 sec  
 RG 2050  
 DW 20.800 usec  
 DE 6.50 usec  
 TE 291.9 K  
 D1 2.00000000 sec  
 D11 0.03000000 sec  
 TD0 1

==== CHANNEL f1 =====  
 NUC1 13C  
 P1 9.90 usec  
 PL1 -1.10 dB  
 PL1W 40.29647064 W  
 SFO1 100.6328888 MHz

==== CHANNEL f2 =====  
 CPDPRG[2] waltz16  
 NUC2 1H  
 PCPD2 90.00 usec  
 PL2 -1.00 dB  
 PL12 14.68 dB  
 PL13 17.68 dB  
 PL2W 10.90985775 W  
 PL12W 0.29499799 W  
 PL13W 0.14784923 W  
 SFO2 400.1716007 MHz

F2 - Processing parameters  
 SI 32768  
 SF 100.6228344 MHz  
 WDW EM  
 SSB 0  
 LB 1.00 Hz  
 GB 0  
 PC 1.40

7.260  
7.240  
7.224  
7.220  
7.190  
7.186  
7.171  
7.167  
6.935  
6.916  
6.858  
6.837  
5.543  
5.535  
5.135  
4.979  
4.946  
3.824  
3.601  
3.584  
3.581  
3.564  
2.493  
2.476  
2.463  
2.455  
2.443  
2.403  
2.255  
2.250  
2.240  
2.233  
2.220  
2.000  
1.967  
1.947  
1.931  
1.916  
1.899  
1.826  
1.763  
1.712  
1.540  
1.513

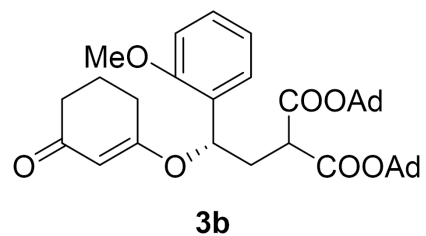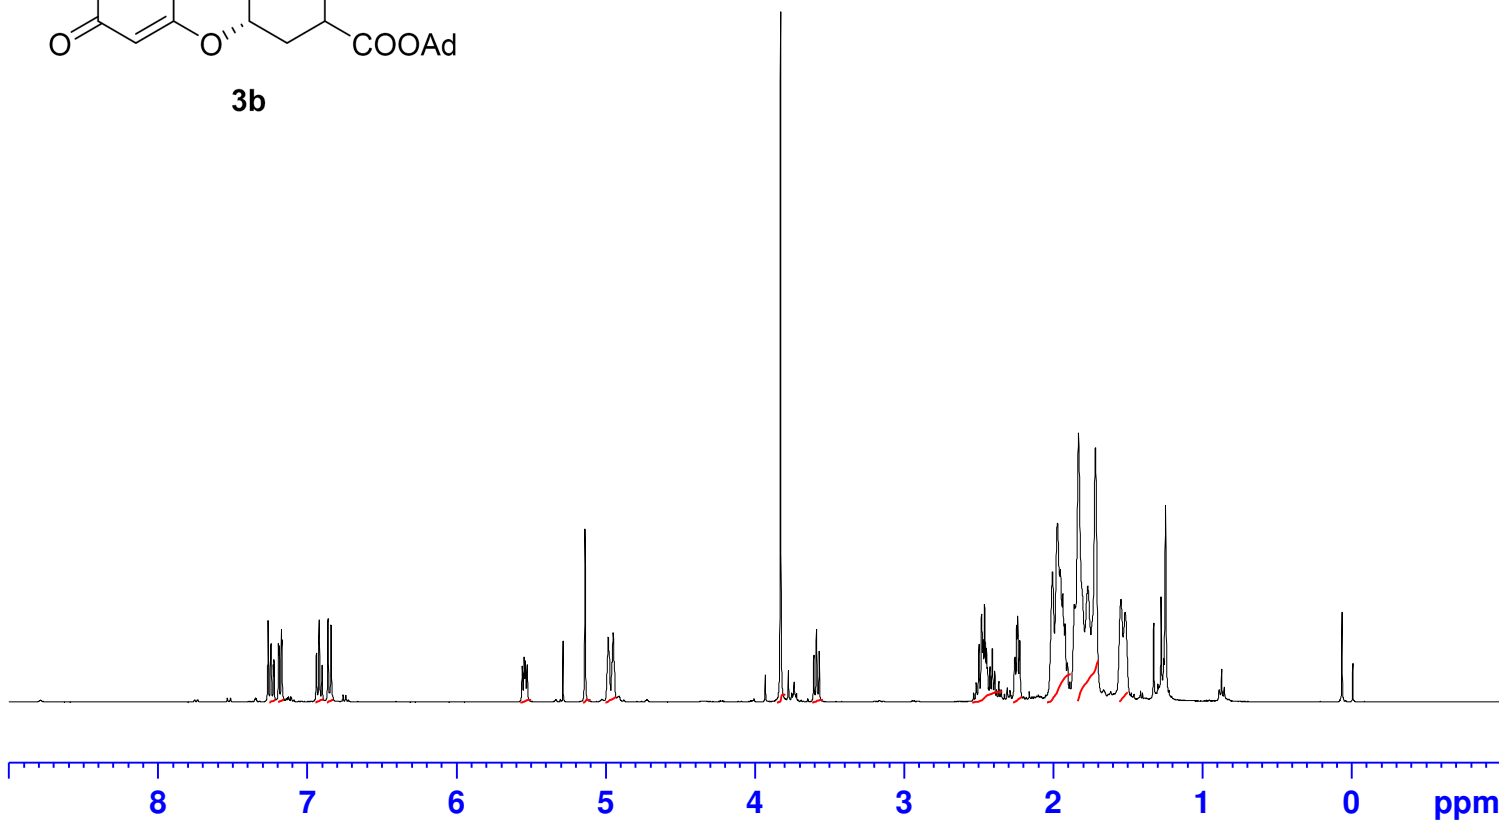

Current Data Parameters  
NAME zjc-130  
EXPNO 2019111101  
PROCNO 1

F2 - Acquisition Parameters  
Date\_ 20191112  
Time 4.51  
INSTRUM spect  
PROBHD 5 mm PABBO BB-  
PULPROG zg30  
TD 65536  
SOLVENT CDCl3  
NS 16  
DS 2  
SWH 8223.685 Hz  
FIDRES 0.125483 Hz  
AQ 3.9845889 sec  
RG 64  
DW 60.800 usec  
DE 6.50 usec  
TE 296.6 K  
D1 1.00000000 sec  
TD0 1

===== CHANNEL f1 =====  
NUC1 1H  
P1 14.80 usec  
PL1 -1.00 dB  
PL1W 10.90985775 W  
SFO1 400.1724712 MHz

F2 - Processing parameters  
SI 32768  
SF 400.1700155 MHz  
WDW no  
SSB 0  
LB 0 Hz  
GB 0  
PC 1.00

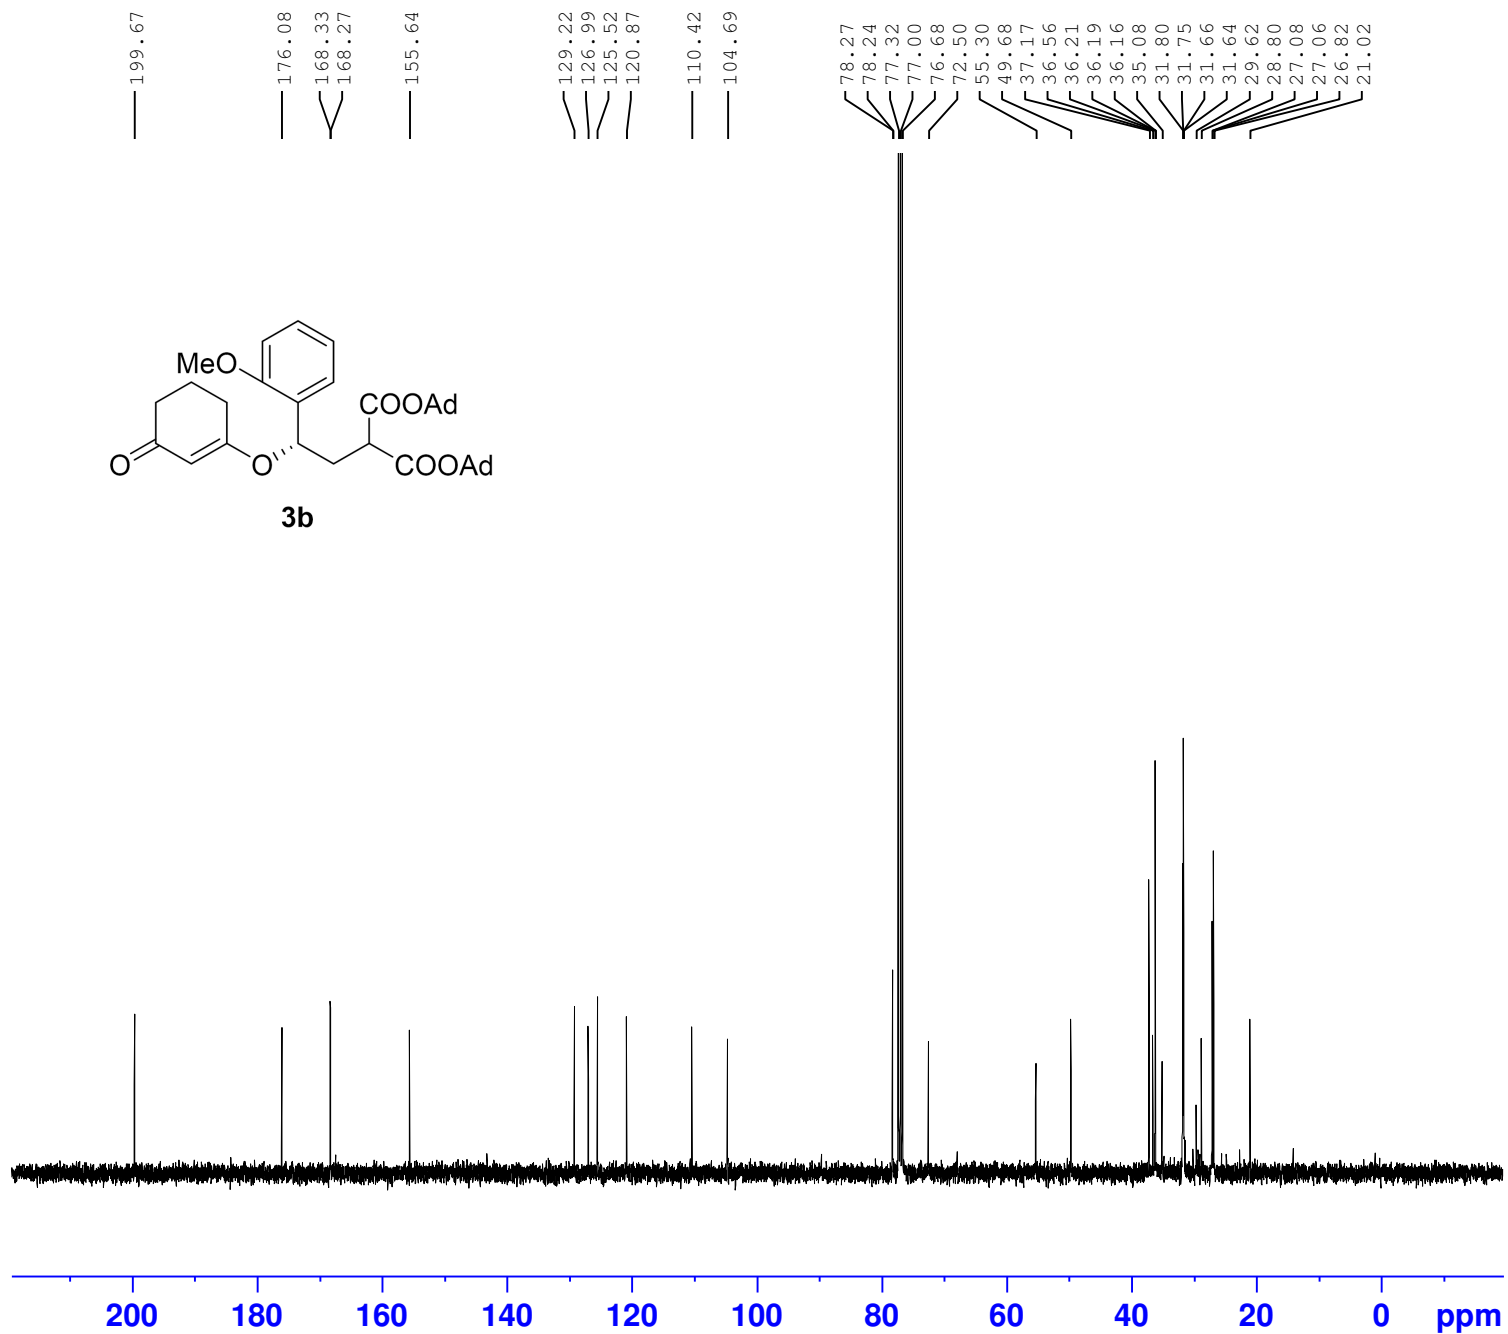

Current Data Parameters  
 NAME zjc-130  
 EXPNO 2019111102  
 PROCNO 1

F2 - Acquisition Parameters  
 Date\_ 20191112  
 Time 5.34  
 INSTRUM spect  
 PROBHD 5 mm PABBO BB-  
 PULPROG zgpg30  
 TD 65536  
 SOLVENT CDCl3  
 NS 155  
 DS 4  
 SWH 24038.461 Hz  
 FIDRES 0.366798 Hz  
 AQ 1.3631488 sec  
 RG 2050  
 DW 20.800 usec  
 DE 6.50 usec  
 TE 297.0 K  
 D1 2.00000000 sec  
 D11 0.03000000 sec  
 TD0 1

==== CHANNEL f1 =====  
 NUC1 13C  
 P1 9.90 usec  
 PL1 -1.10 dB  
 PL1W 40.29647064 W  
 SFO1 100.6328888 MHz

==== CHANNEL f2 =====  
 CPDPRG[2] waltz16  
 NUC2 1H  
 PCPD2 90.00 usec  
 PL2 -1.00 dB  
 PL12 14.68 dB  
 PL13 17.68 dB  
 PL2W 10.90985775 W  
 PL12W 0.29499799 W  
 PL13W 0.14784923 W  
 SFO2 400.1716007 MHz

F2 - Processing parameters  
 SI 32768  
 SF 100.6228352 MHz  
 WDW EM  
 SSB 0  
 LB 1.00 Hz  
 GB 0  
 PC 1.40

7.276  
7.260  
7.257  
7.237  
6.835  
6.828  
6.814  
6.808  
6.778  
6.774  
6.768  
5.172  
4.997  
4.989  
4.977  
3.796  
3.592  
3.577  
3.571  
3.555  
2.481  
2.465  
2.448  
2.436  
2.433  
2.426  
2.272  
2.257  
2.239  
2.003  
1.995  
1.977  
1.960  
1.946  
1.929  
1.871  
1.864  
1.839  
1.776  
1.725  
1.576  
1.552  
1.526  
1.521

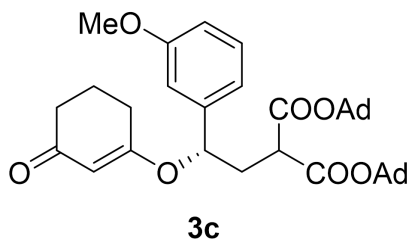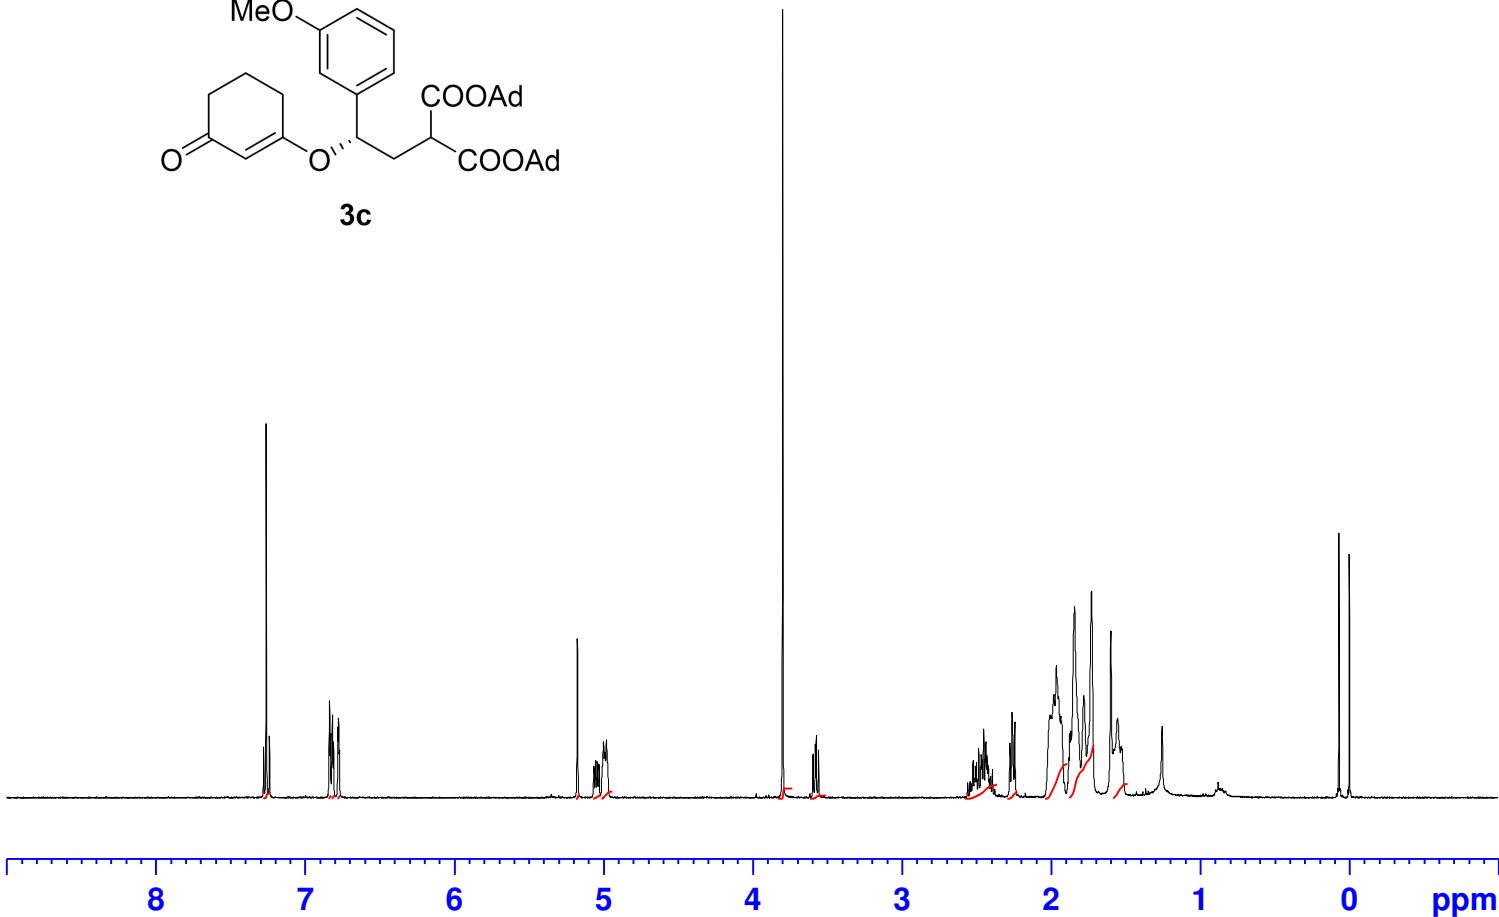

Current Data Parameters  
NAME zjc-114-re  
EXPNO 2019110701  
PROCNO 1

F2 - Acquisition Parameters  
Date\_ 20191107  
Time 16.45  
INSTRUM spect  
PROBHD 5 mm PABBO BB-  
PULPROG zg30  
TD 65536  
SOLVENT CDC13  
NS 16  
DS 2  
SWH 8223.685 Hz  
FIDRES 0.125483 Hz  
AQ 3.9845889 sec  
RG 228  
DW 60.800 usec  
DE 6.50 usec  
TE 296.8 K  
D1 1.00000000 sec  
TD0 1

===== CHANNEL f1 =====  
NUC1 1H  
P1 14.80 usec  
PL1 -1.00 dB  
PL1W 10.90985775 W  
SFO1 400.1724712 MHz

F2 - Processing parameters  
SI 32768  
SF 400.1700160 MHz  
WDW no  
SSB 0  
LB 0 Hz  
GB 0  
PC 1.00

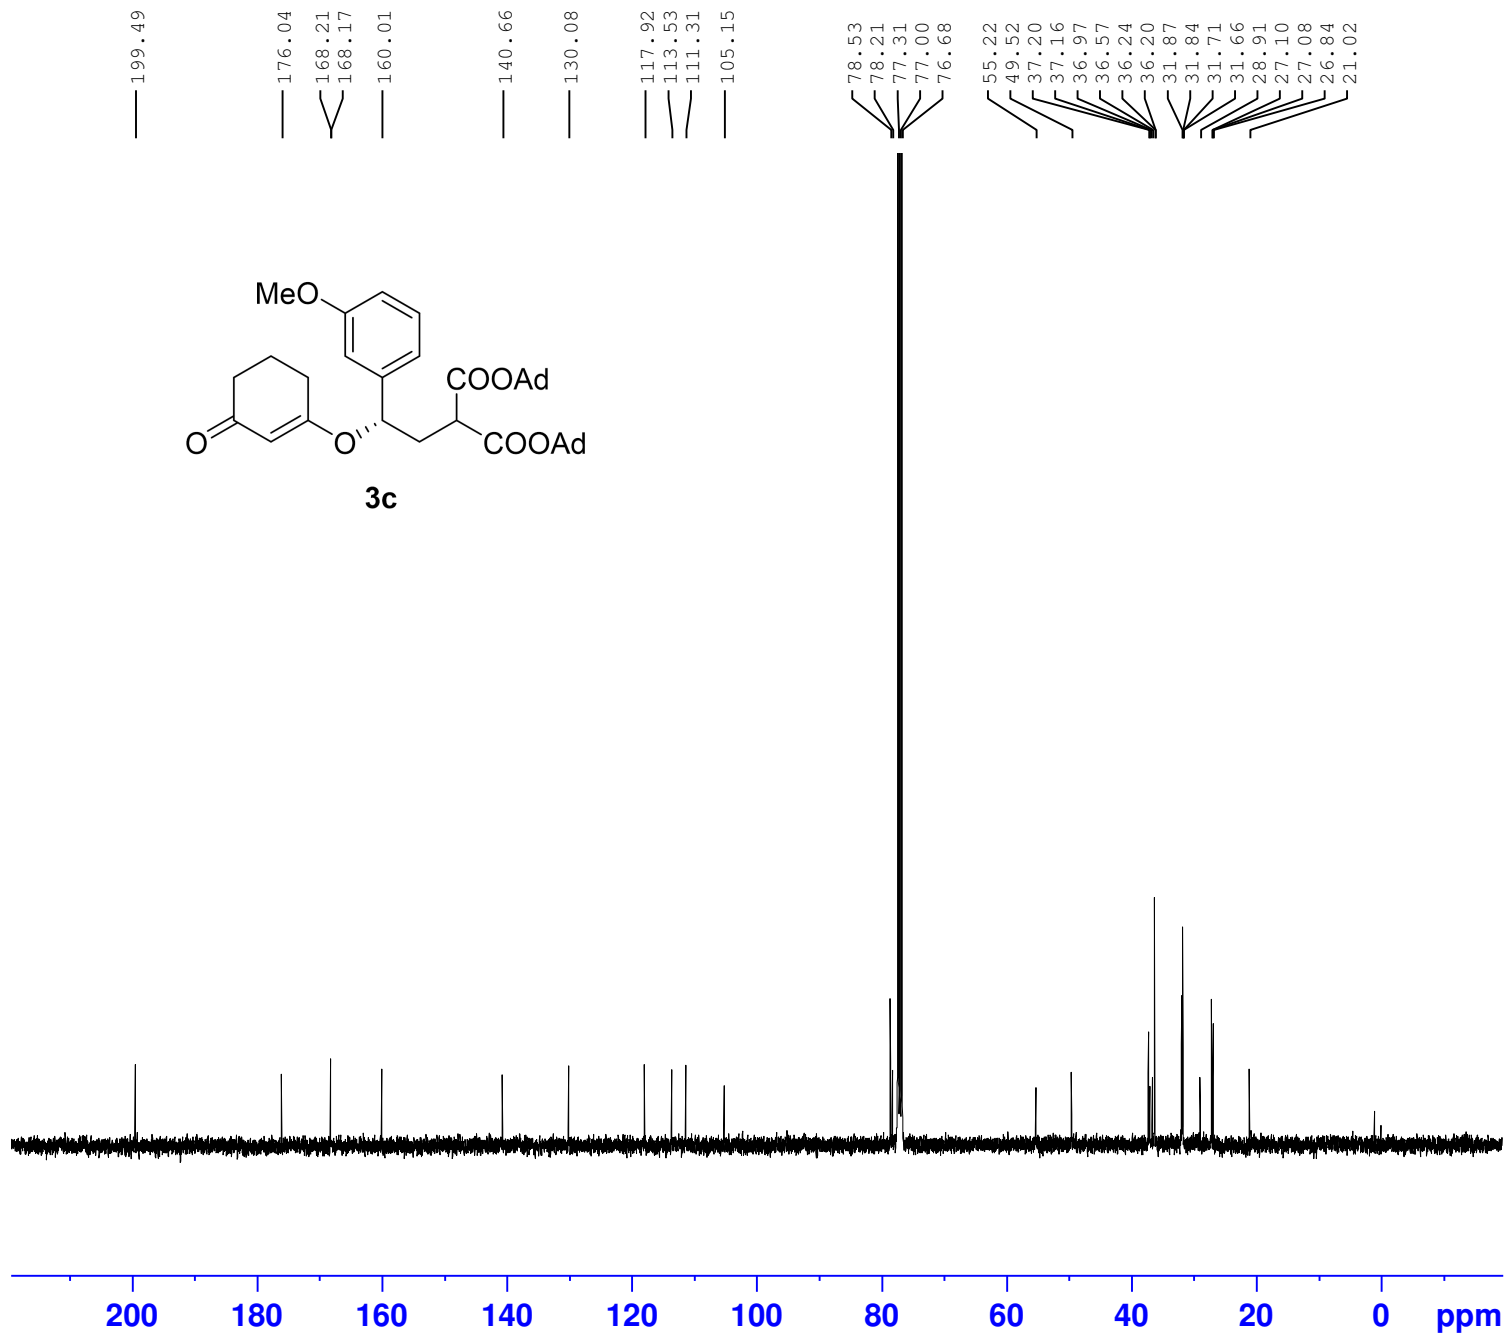

Current Data Parameters  
 NAME zjc-114-re  
 EXPNO 2019110702  
 PROCNO 1

F2 - Acquisition Parameters  
 Date\_ 20191107  
 Time 17.34  
 INSTRUM spect  
 PROBHD 5 mm PABBO BB-  
 PULPROG zgpg30  
 TD 65536  
 SOLVENT CDC13  
 NS 1146  
 DS 4  
 SWH 24038.461 Hz  
 FIDRES 0.366798 Hz  
 AQ 1.3631488 sec  
 RG 2050  
 DW 20.800 usec  
 DE 6.50 usec  
 TE 297.1 K  
 D1 2.00000000 sec  
 D11 0.03000000 sec  
 TD0 1

==== CHANNEL f1 =====  
 NUC1 13C  
 P1 9.90 usec  
 PL1 -1.10 dB  
 PL1W 40.29647064 W  
 SFO1 100.6328888 MHz

==== CHANNEL f2 =====  
 CPDPRG[2] waltz16  
 NUC2 1H  
 PCPD2 90.00 usec  
 PL2 -1.00 dB  
 PL12 14.68 dB  
 PL13 17.68 dB  
 PL2W 10.90985775 W  
 PL12W 0.29499799 W  
 PL13W 0.14784923 W  
 SFO2 400.1716007 MHz

F2 - Processing parameters  
 SI 32768  
 SF 100.6228315 MHz  
 WDW EM  
 SSB 0  
 LB 1.00 Hz  
 GB 0  
 PC 1.40

7.432  
7.416  
7.412  
7.407  
7.405  
7.388  
7.383  
7.368  
7.345  
7.328  
7.260  
7.190  
7.168  
6.954  
6.932  
5.193  
5.037  
4.984  
4.977  
3.533  
3.528  
3.512  
2.432  
2.399  
2.255  
2.250  
2.236  
2.001  
1.968  
1.953  
1.940  
1.933  
1.924  
1.874  
1.867  
1.840  
1.834  
1.827  
1.819  
1.776  
1.725  
1.568  
1.545  
1.520

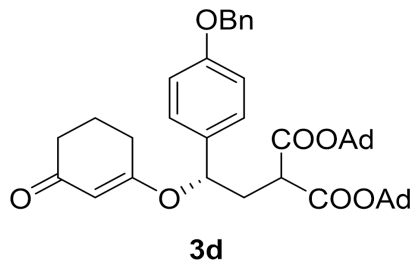

Current Data Parameters  
NAME yl-121 re  
EXPNO 2019103101  
PROCNO 1

F2 - Acquisition Parameters  
Date\_ 20191031  
Time 16.05  
INSTRUM spect  
PROBHD 5 mm PABBO BB-  
PULPROG zg30  
TD 65536  
SOLVENT CDC13  
NS 16  
DS 2  
SWH 8223.685 Hz  
FIDRES 0.125483 Hz  
AQ 3.9845889 sec  
RG 144  
DW 60.800 usec  
DE 6.50 usec  
TE 296.2 K  
D1 1.00000000 sec  
TD0 1

===== CHANNEL f1 =====  
NUC1 1H  
P1 14.80 usec  
PL1 -1.00 dB  
PL1W 10.90985775 W  
SFO1 400.1724712 MHz

F2 - Processing parameters  
SI 32768  
SF 400.1700160 MHz  
WDW no  
SSB 0  
LB 0 Hz  
GB 0  
PC 1.00

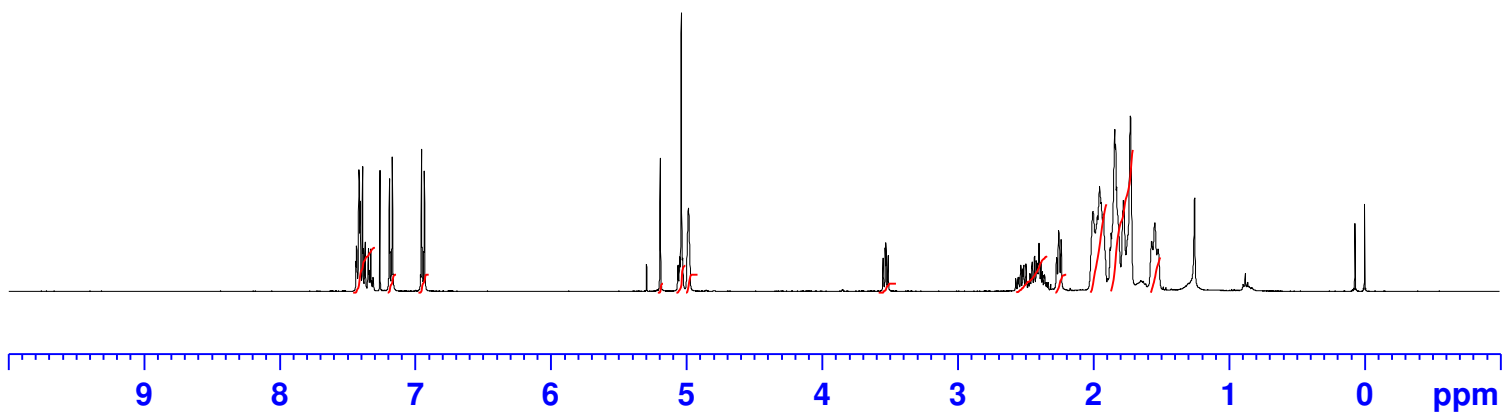

5.06  
2.04  
2.03  
1.00  
3.02  
2.06  
1.02  
4.12  
2.02  
10.01  
16.06  
4.01



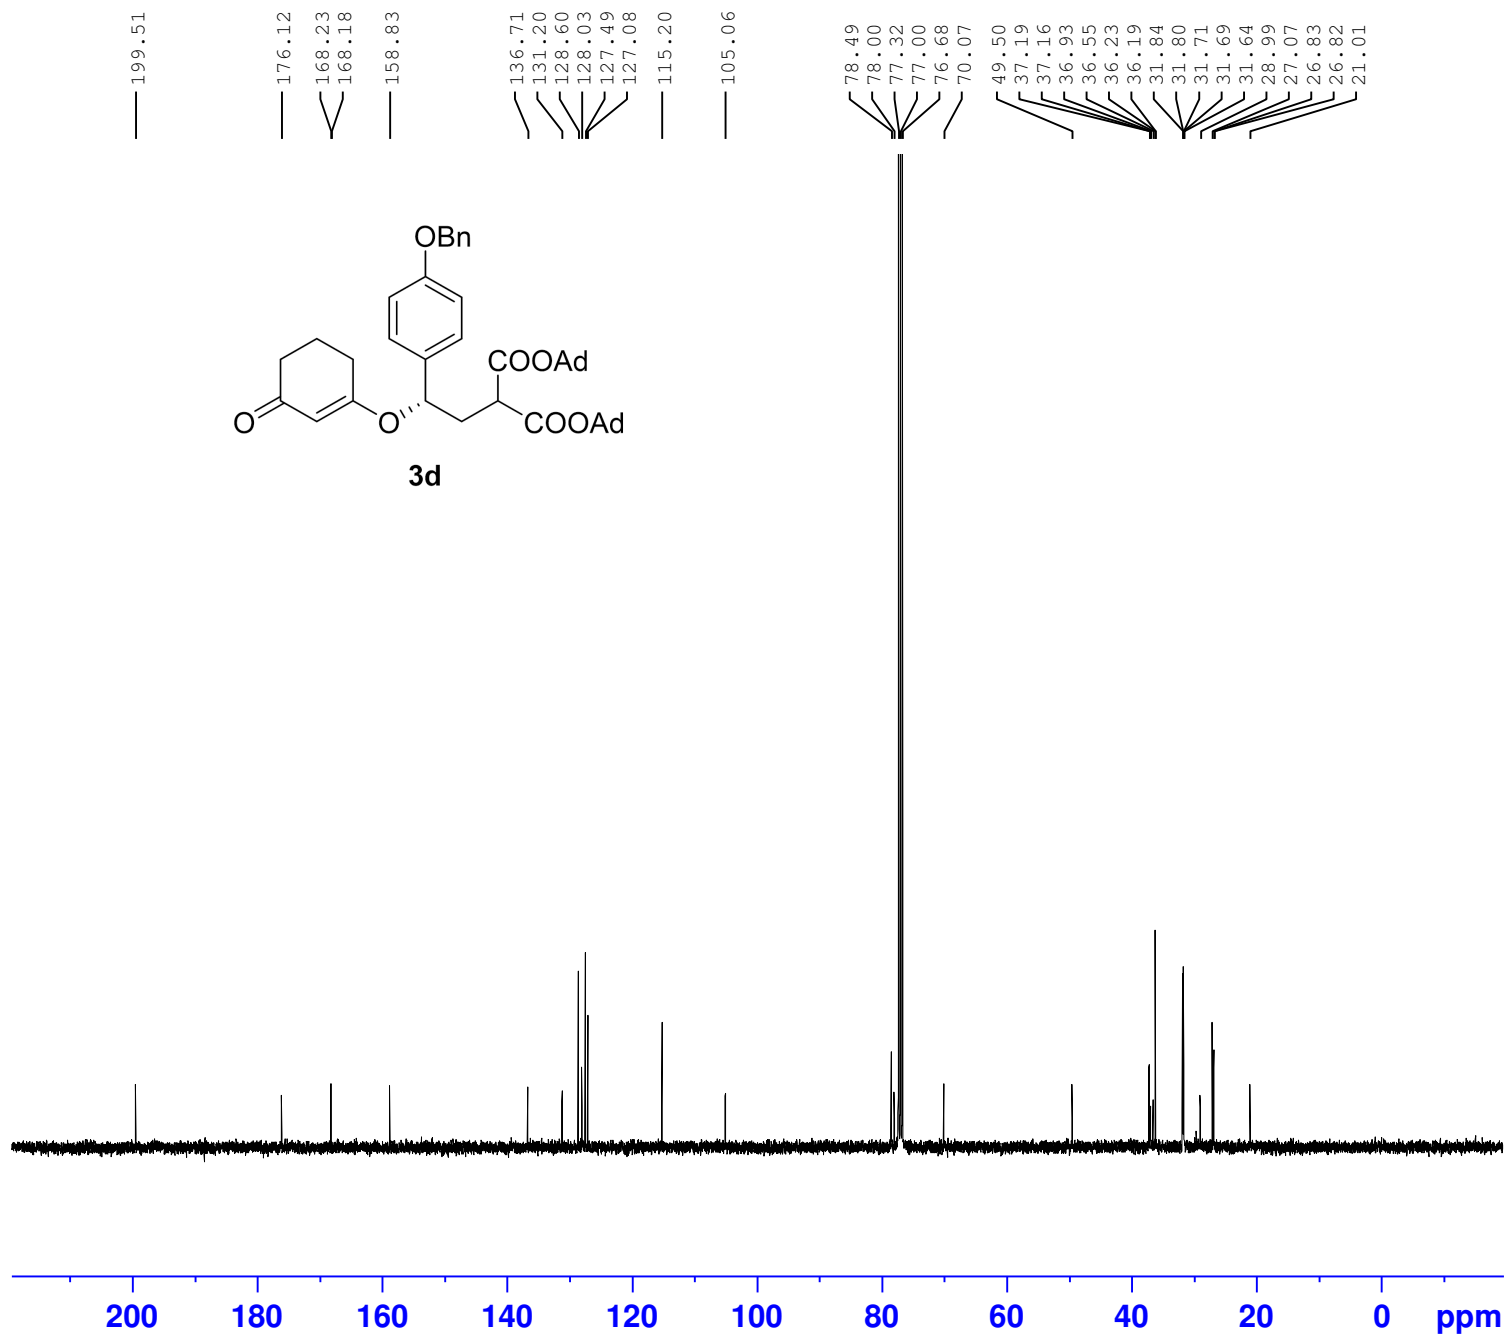

Current Data Parameters  
 NAME yl-121 re  
 EXPNO 2019103102  
 PROCNO 1

F2 - Acquisition Parameters  
 Date\_ 20191031  
 Time 16.50  
 INSTRUM spect  
 PROBHD 5 mm PABBO BB-  
 PULPROG zgpg30  
 TD 65536  
 SOLVENT CDC13  
 NS 312  
 DS 4  
 SWH 24038.461 Hz  
 FIDRES 0.366798 Hz  
 AQ 1.3631488 sec  
 RG 2050  
 DW 20.800 usec  
 DE 6.50 usec  
 TE 296.4 K  
 D1 2.00000000 sec  
 D11 0.03000000 sec  
 TD0 1

==== CHANNEL f1 =====  
 NUC1 13C  
 P1 9.90 usec  
 PL1 -1.10 dB  
 PL1W 40.29647064 W  
 SFO1 100.6328888 MHz

==== CHANNEL f2 =====  
 CPDPRG[2] waltz16  
 NUC2 1H  
 PCPD2 90.00 usec  
 PL2 -1.00 dB  
 PL12 14.68 dB  
 PL13 17.68 dB  
 PL2W 10.90985775 W  
 PL12W 0.29499799 W  
 PL13W 0.14784923 W  
 SFO2 400.1716007 MHz

F2 - Processing parameters  
 SI 32768  
 SF 100.6228330 MHz  
 WDW EM  
 SSB 0  
 LB 1.00 Hz  
 GB 0  
 PC 1.40

7.366  
7.349  
7.345  
7.330  
7.310  
7.307  
7.293  
7.260  
7.255  
7.238  
5.167  
4.997  
4.989  
4.979  
3.586  
3.570  
3.565  
3.549  
2.512  
2.470  
2.452  
2.431  
2.416  
2.269  
2.255  
2.250  
2.236  
2.003  
1.977  
1.961  
1.950  
1.933  
1.921  
1.879  
1.872  
1.865  
1.840  
1.777  
1.726  
1.574  
1.568  
1.550  
1.528  
1.521

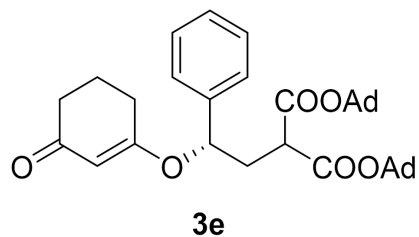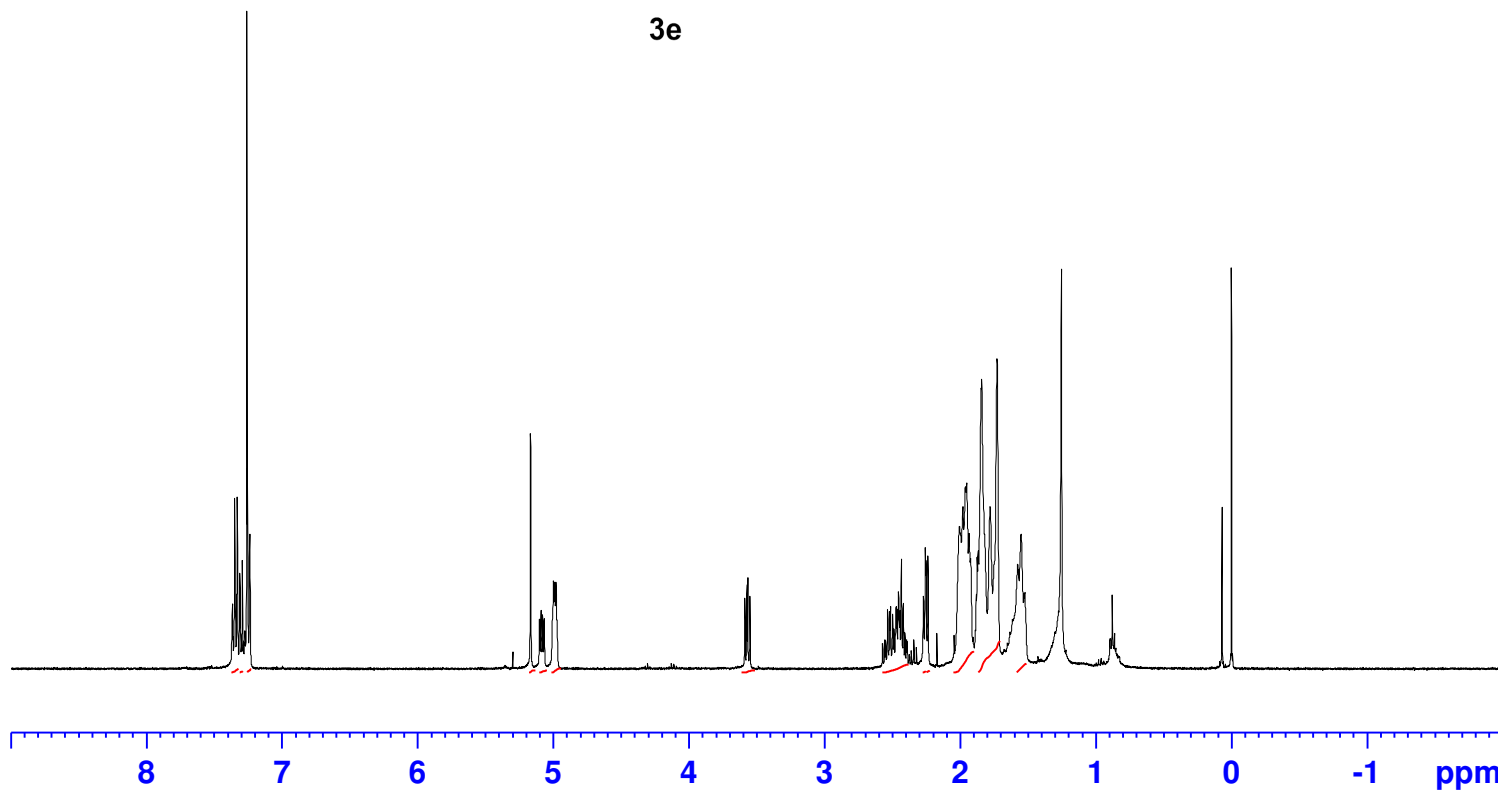

2.08  
0.91  
1.73  
1.00  
1.02  
1.98  
1.01  
4.15  
0.97  
0.99  
10.85  
16.17  
4.79

Current Data Parameters  
NAME yl-120 re  
EXPNO 2019103101  
PROCNO 1

F2 - Acquisition Parameters  
Date\_ 20191031  
Time 16.00  
INSTRUM spect  
PROBHD 5 mm PABBO BB-  
PULPROG zg30  
TD 65536  
SOLVENT CDCl3  
NS 16  
DS 2  
SWH 8223.685 Hz  
FIDRES 0.125483 Hz  
AQ 3.9845889 sec  
RG 228  
DW 60.800 usec  
DE 6.50 usec  
TE 296.2 K  
D1 1.00000000 sec  
TD0 1

===== CHANNEL f1 =====  
NUC1 1H  
P1 14.80 usec  
PL1 -1.00 dB  
PL1W 10.90985775 W  
SFO1 400.1724712 MHz

F2 - Processing parameters  
SI 32768  
SF 400.1700158 MHz  
WDW no  
SSB 0  
LB 0 Hz  
GB 0  
PC 1.00

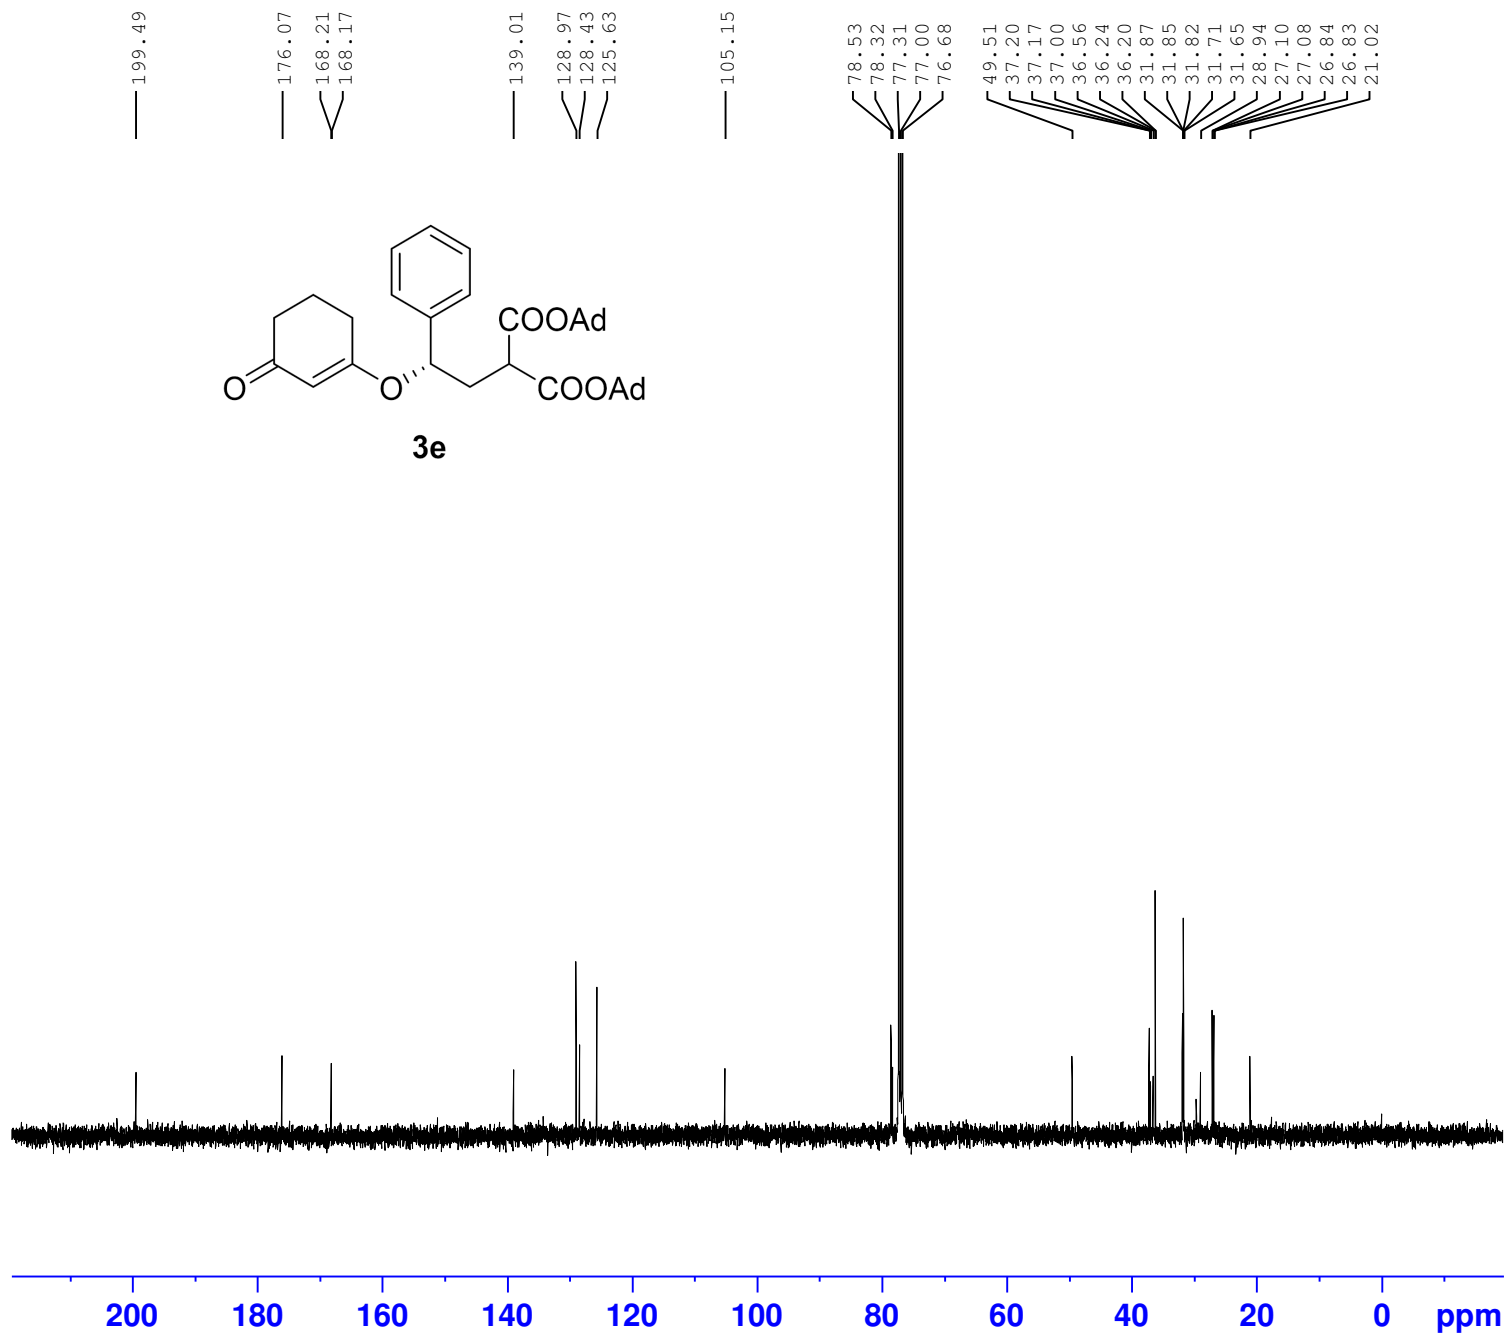

Current Data Parameters  
 NAME yl-120 re  
 EXPNO 2019103102  
 PROCNO 1

F2 - Acquisition Parameters  
 Date\_ 20191031  
 Time 17.24  
 INSTRUM spect  
 PROBHD 5 mm PABBO BB-  
 PULPROG zgpg30  
 TD 65536  
 SOLVENT CDC13  
 NS 794  
 DS 4  
 SWH 24038.461 Hz  
 FIDRES 0.366798 Hz  
 AQ 1.3631488 sec  
 RG 2050  
 DW 20.800 usec  
 DE 6.50 usec  
 TE 296.9 K  
 D1 2.00000000 sec  
 D11 0.03000000 sec  
 TD0 1

==== CHANNEL f1 =====  
 NUC1 13C  
 P1 9.90 usec  
 PL1 -1.10 dB  
 PL1W 40.29647064 W  
 SFO1 100.6328888 MHz

==== CHANNEL f2 =====  
 CPDPRG[2] waltz16  
 NUC2 1H  
 PCPD2 90.00 usec  
 PL2 -1.00 dB  
 PL12 14.68 dB  
 PL13 17.68 dB  
 PL2W 10.90985775 W  
 PL12W 0.29499799 W  
 PL13W 0.14784923 W  
 SFO2 400.1716007 MHz

F2 - Processing parameters  
 SI 32768  
 SF 100.6228315 MHz  
 WDW EM  
 SSB 0  
 LB 1.00 Hz  
 GB 0  
 PC 1.40

7.322  
7.301  
7.192  
7.170  
5.105  
5.060  
5.049  
5.038  
4.975  
4.967  
4.958  
3.550  
3.535  
3.528  
3.513  
2.485  
2.470  
2.464  
2.448  
2.420  
2.407  
2.398  
2.387  
2.259  
2.244  
2.241  
2.226  
1.983  
1.963  
1.949  
1.941  
1.934  
1.927  
1.919  
1.903  
1.856  
1.850  
1.824  
1.758  
1.709  
1.556  
1.532  
1.513  
1.507

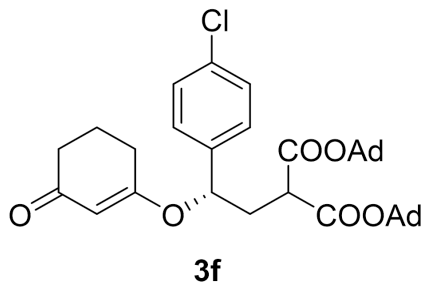

Current Data Parameters  
NAME zjc-115 re  
EXPNO 2019103101  
PROCNO 1

F2 - Acquisition Parameters  
Date\_ 20191031  
Time 15.52  
INSTRUM spect  
PROBHD 5 mm PABBO BB-  
PULPROG zg30  
TD 65536  
SOLVENT CDC13  
NS 16  
DS 2  
SWH 8223.685 Hz  
FIDRES 0.125483 Hz  
AQ 3.9845889 sec  
RG 40.3  
DW 60.800 usec  
DE 6.50 usec  
TE 296.1 K  
D1 1.0000000 sec  
TD0 1

==== CHANNEL f1 =====  
NUC1 1H  
P1 14.80 usec  
PL1 -1.00 dB  
PL1W 10.90985775 W  
SFO1 400.1724712 MHz

F2 - Processing parameters  
SI 32768  
SF 400.1700158 MHz  
WDW no  
SSB 0  
LB 0 Hz  
GB 0  
PC 1.00

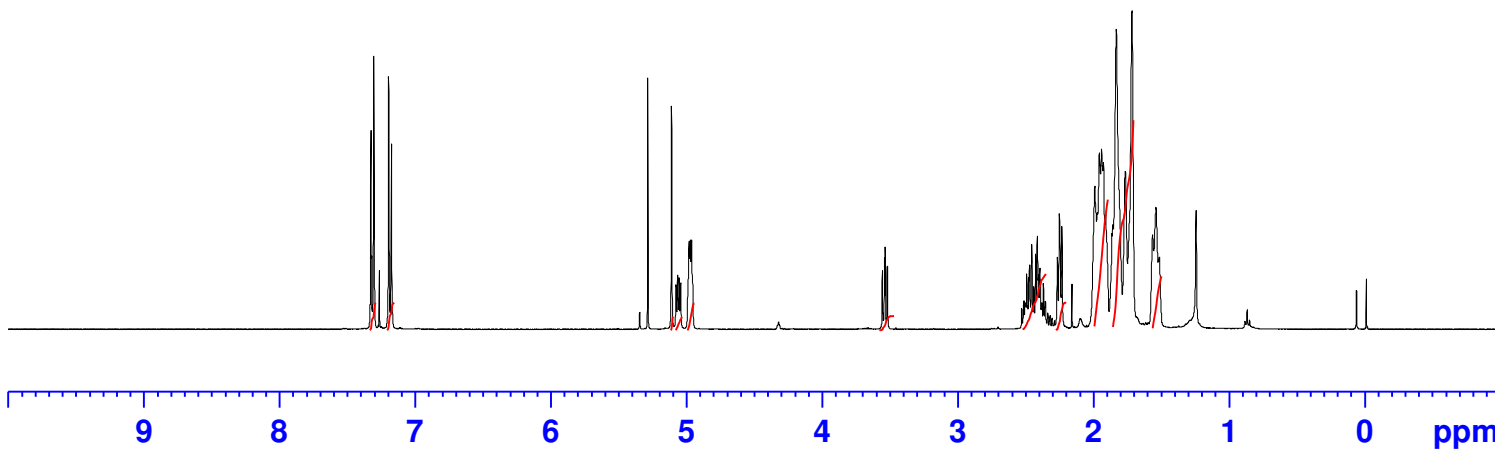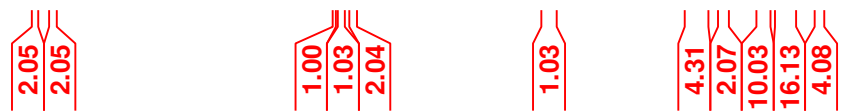

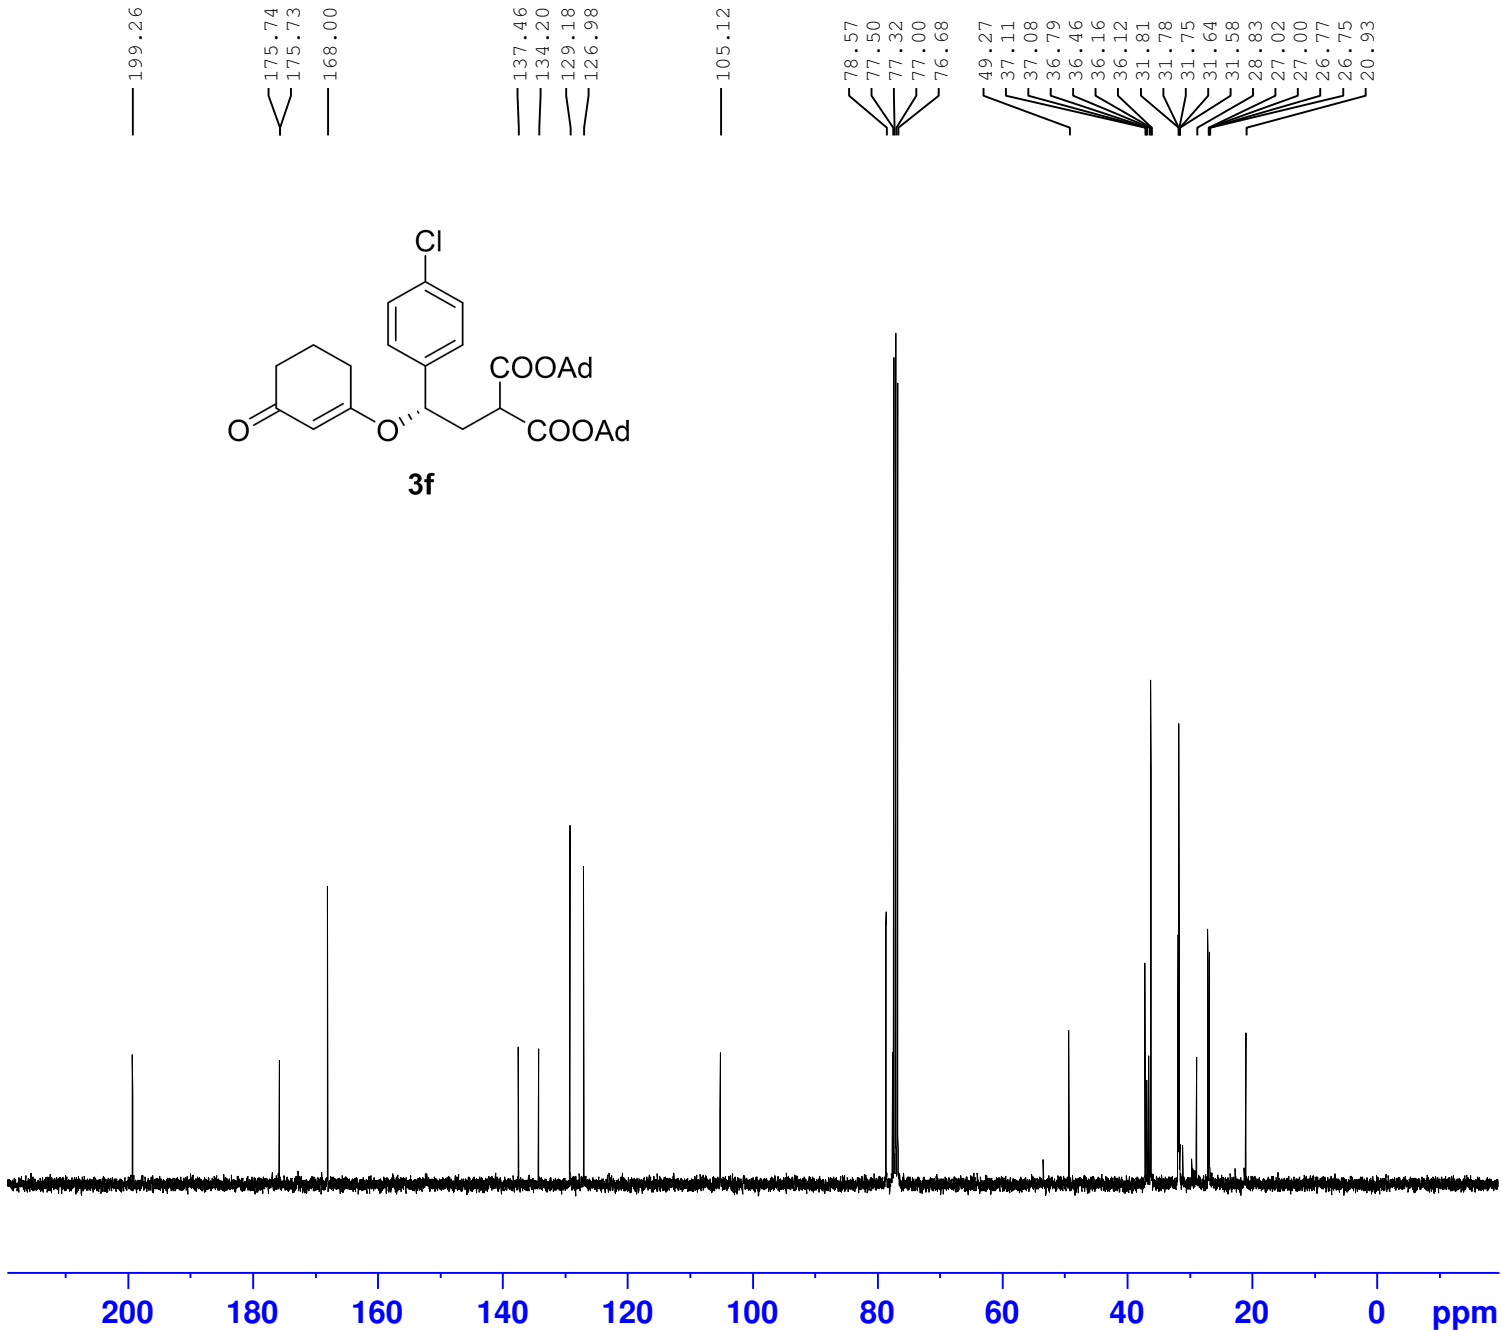

Current Data Parameters  
 NAME zjc-115 re  
 EXPNO 2019103102  
 PROCNO 1

F2 - Acquisition Parameters  
 Date\_ 20191031  
 Time 16.29  
 INSTRUM spect  
 PROBHD 5 mm PABBO BB-  
 PULPROG zgpg30  
 TD 65536  
 SOLVENT CDC13  
 NS 166  
 DS 4  
 SWH 24038.461 Hz  
 FIDRES 0.366798 Hz  
 AQ 1.3631488 sec  
 RG 2050  
 DW 20.800 usec  
 DE 6.50 usec  
 TE 296.4 K  
 D1 2.00000000 sec  
 D11 0.03000000 sec  
 TD0 1

===== CHANNEL f1 =====  
 NUC1 13C  
 P1 9.90 usec  
 PL1 -1.10 dB  
 PL1W 40.29647064 W  
 SFO1 100.6328888 MHz

===== CHANNEL f2 =====  
 CPDPRG[2] waltz16  
 NUC2 1H  
 PCPD2 90.00 usec  
 PL2 -1.00 dB  
 PL12 14.68 dB  
 PL13 17.68 dB  
 PL2W 10.90985775 W  
 PL12W 0.29499799 W  
 PL13W 0.14784923 W  
 SFO2 400.1716007 MHz

F2 - Processing parameters  
 SI 32768  
 SF 100.6228366 MHz  
 WDW EM  
 SSB 0  
 LB 1.00 Hz  
 GB 0  
 PC 1.40

7.275  
7.272  
7.260  
6.998  
6.997  
6.990  
6.988  
6.955  
6.946  
6.943  
6.934  
5.436  
5.423  
5.415  
5.402  
5.353  
4.982  
4.975  
3.541  
3.524  
3.521  
3.504  
2.654  
2.638  
2.633  
2.514  
2.508  
2.494  
2.421  
2.382  
2.283  
2.269  
2.265  
2.250  
1.993  
1.949  
1.933  
1.919  
1.826  
1.764  
1.714  
1.558  
1.539  
1.516

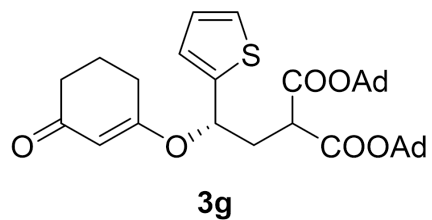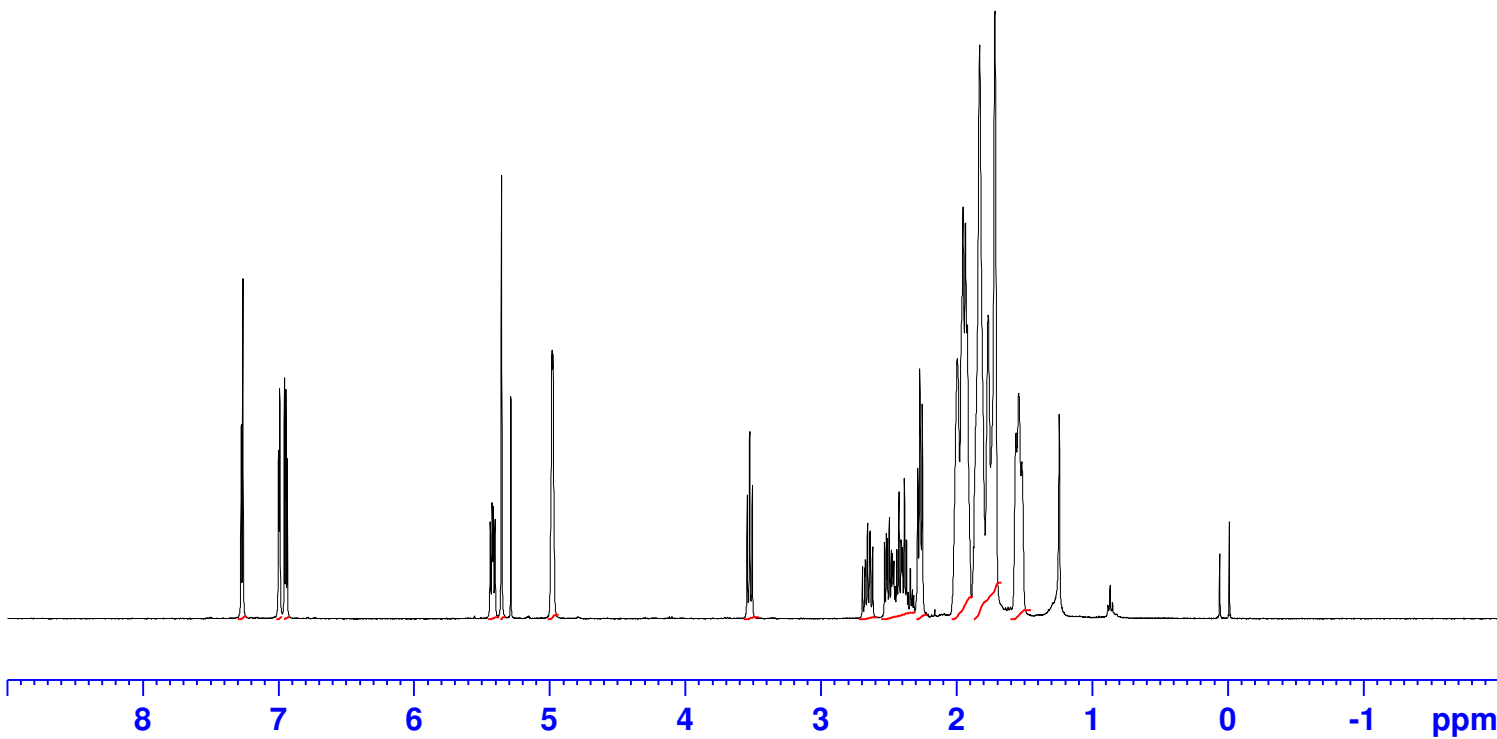

Current Data Parameters  
NAME yl-119 re  
EXPNO 2019103101  
PROCNO 1

F2 - Acquisition Parameters  
Date\_ 20191031  
Time 15.56  
INSTRUM spect  
PROBHD 5 mm PABBO BB-  
PULPROG zg30  
TD 65536  
SOLVENT CDC13  
NS 16  
DS 2  
SWH 8223.685 Hz  
FIDRES 0.125483 Hz  
AQ 3.9845889 sec  
RG 71.8  
DW 60.800 usec  
DE 6.50 usec  
TE 296.1 K  
D1 1.00000000 sec  
TD0 1

==== CHANNEL f1 =====  
NUC1 1H  
P1 14.80 usec  
PL1 -1.00 dB  
PL1W 10.90985775 W  
SFO1 400.1724712 MHz

F2 - Processing parameters  
SI 32768  
SF 400.1700158 MHz  
WDW no  
SSB 0  
LB 0 Hz  
GB 0  
PC 1.00

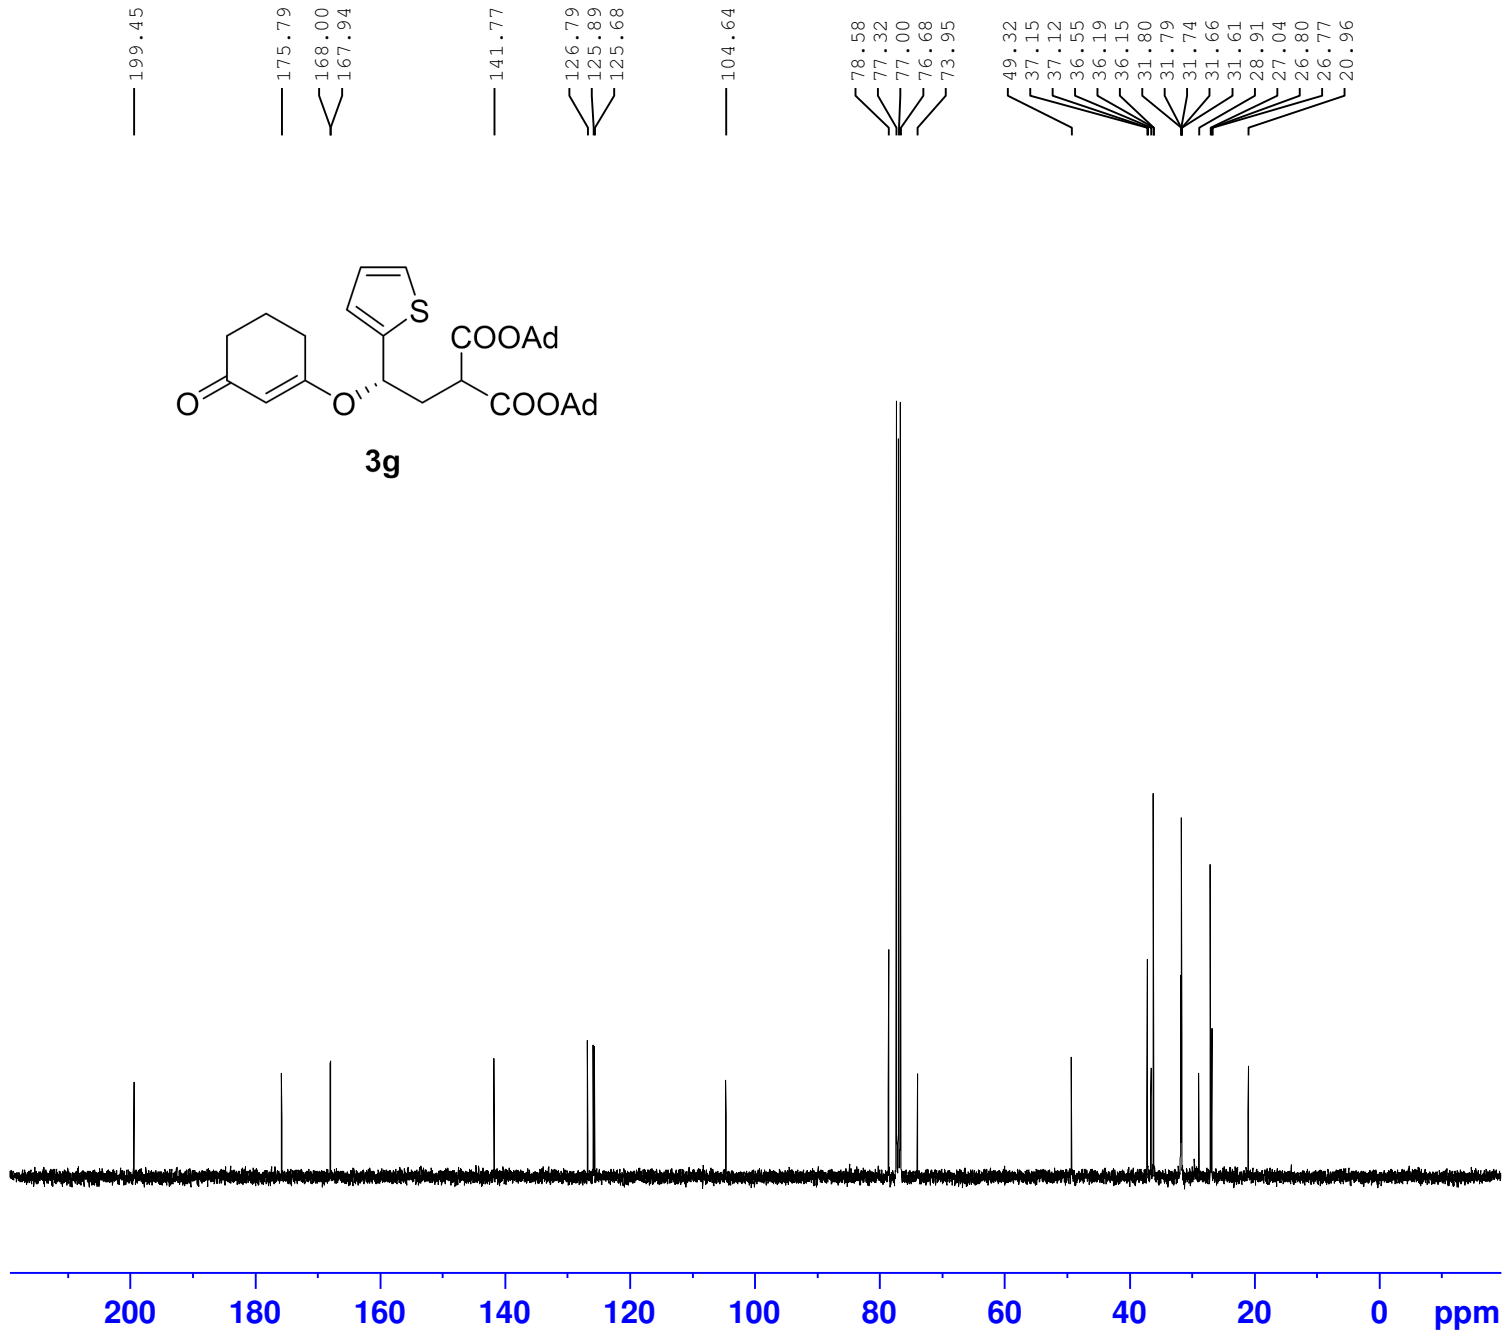

Current Data Parameters  
 NAME yl-119 re  
 EXPNO 2019103102  
 PROCNO 1

F2 - Acquisition Parameters  
 Date\_ 20191031  
 Time 16.42  
 INSTRUM spect  
 PROBHD 5 mm PABBO BB-  
 PULPROG zgpg30  
 TD 65536  
 SOLVENT CDC13  
 NS 132  
 DS 4  
 SWH 24038.461 Hz  
 FIDRES 0.366798 Hz  
 AQ 1.3631488 sec  
 RG 2050  
 DW 20.800 usec  
 DE 6.50 usec  
 TE 296.5 K  
 D1 2.00000000 sec  
 D11 0.03000000 sec  
 TD0 1

==== CHANNEL f1 =====  
 NUC1 13C  
 P1 9.90 usec  
 PL1 -1.10 dB  
 PL1W 40.29647064 W  
 SFO1 100.6328888 MHz

==== CHANNEL f2 =====  
 CPDPRG[2] waltz16  
 NUC2 1H  
 PCPD2 90.00 usec  
 PL2 -1.00 dB  
 PL12 14.68 dB  
 PL13 17.68 dB  
 PL2W 10.90985775 W  
 PL12W 0.29499799 W  
 PL13W 0.14784923 W  
 SFO2 400.1716007 MHz

F2 - Processing parameters  
 SI 32768  
 SF 100.6228352 MHz  
 WDW EM  
 SSB 0  
 LB 1.00 Hz  
 GB 0  
 PC 1.40

7.655  
7.636  
7.499  
7.330  
7.327  
7.309  
7.306  
7.260  
7.250  
7.247  
7.230  
7.228  
5.403  
5.393  
5.338  
4.992  
4.982  
3.633  
3.617  
3.612  
3.596  
2.429  
2.257  
2.249  
2.244  
2.238  
2.229  
1.990  
1.968  
1.951  
1.937  
1.916  
1.865  
1.858  
1.832  
1.811  
1.771  
1.738  
1.716  
1.671  
1.558  
1.555  
1.543  
1.527

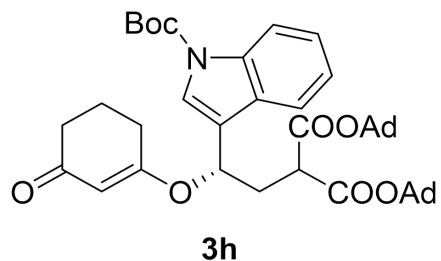

Current Data Parameters  
NAME yl-143 rep2  
EXPNO 2019121901  
PROCNO 1

F2 - Acquisition Parameters  
Date\_ 20191219  
Time 17.40  
INSTRUM spect  
PROBHD 5 mm PABBO BB-  
PULPROG zg30  
TD 65536  
SOLVENT CDCl3  
NS 16  
DS 2  
SWH 8223.685 Hz  
FIDRES 0.125483 Hz  
AQ 3.9845889 sec  
RG 101  
DW 60.800 usec  
DE 6.50 usec  
TE 291.7 K  
D1 1.00000000 sec  
TD0 1

==== CHANNEL f1 =====  
NUC1 1H  
P1 14.80 usec  
PL1 -1.00 dB  
PL1W 10.90985775 W  
SFO1 400.1724712 MHz

F2 - Processing parameters  
SI 32768  
SF 400.1700155 MHz  
WDW no  
SSB 0  
LB 0 Hz  
GB 0  
PC 1.00

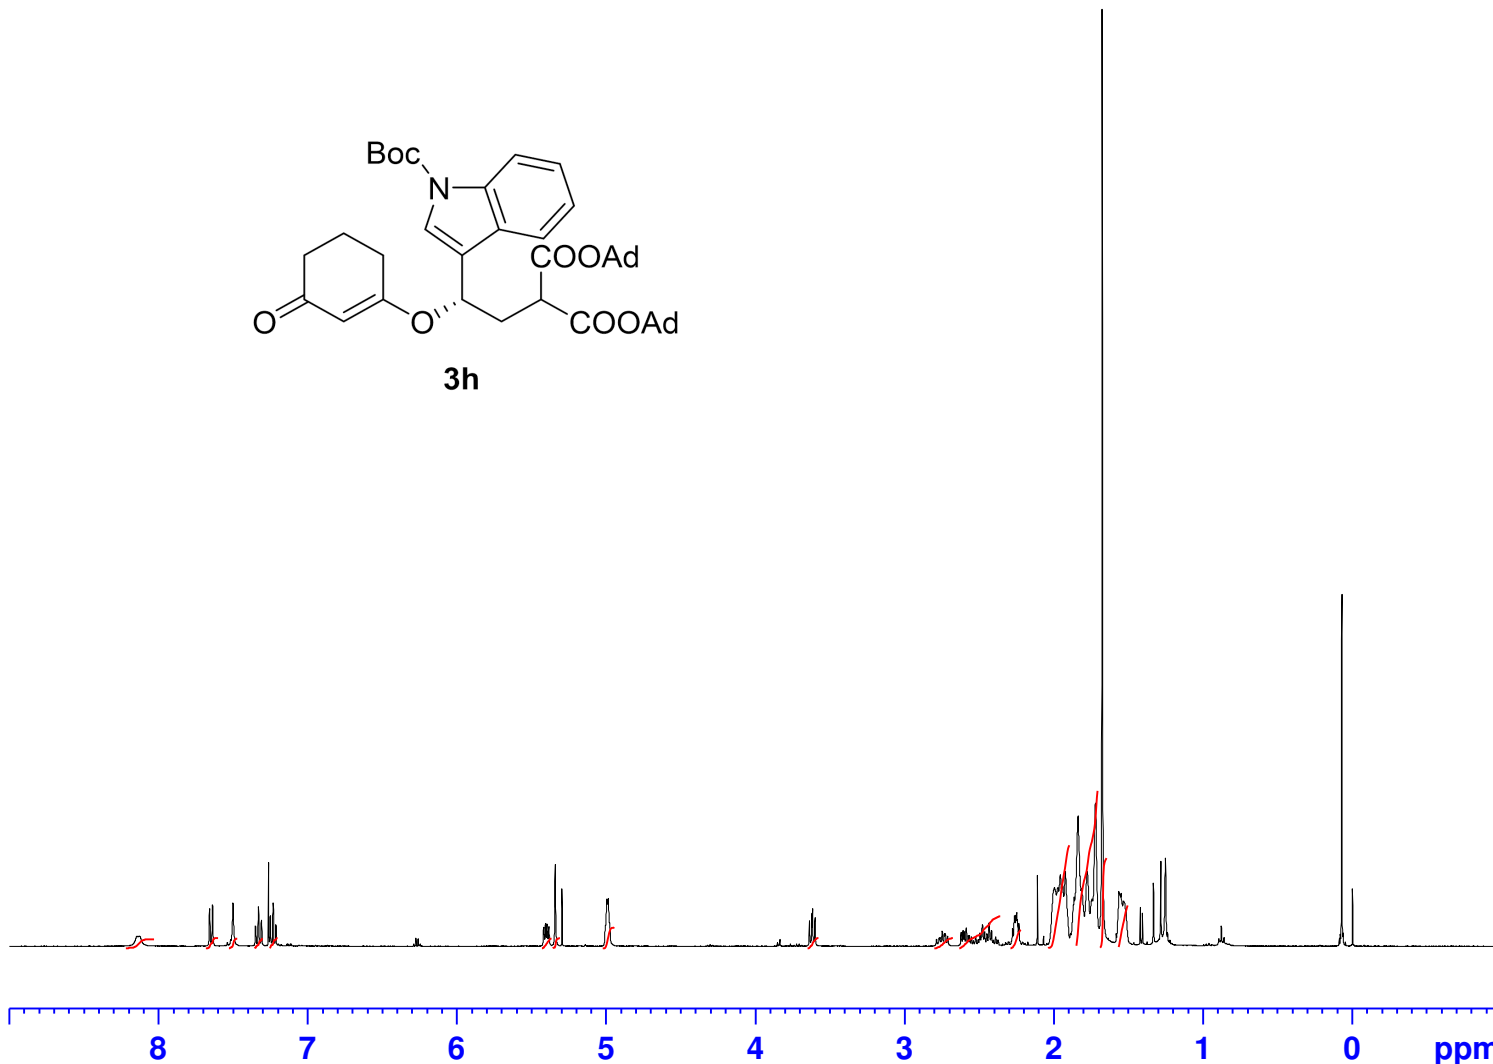

0.91  
1.00  
0.94  
1.02  
1.02  
0.97  
0.99  
2.07  
1.00  
0.99  
3.21  
1.86  
10.38  
15.99  
9.05  
4.27



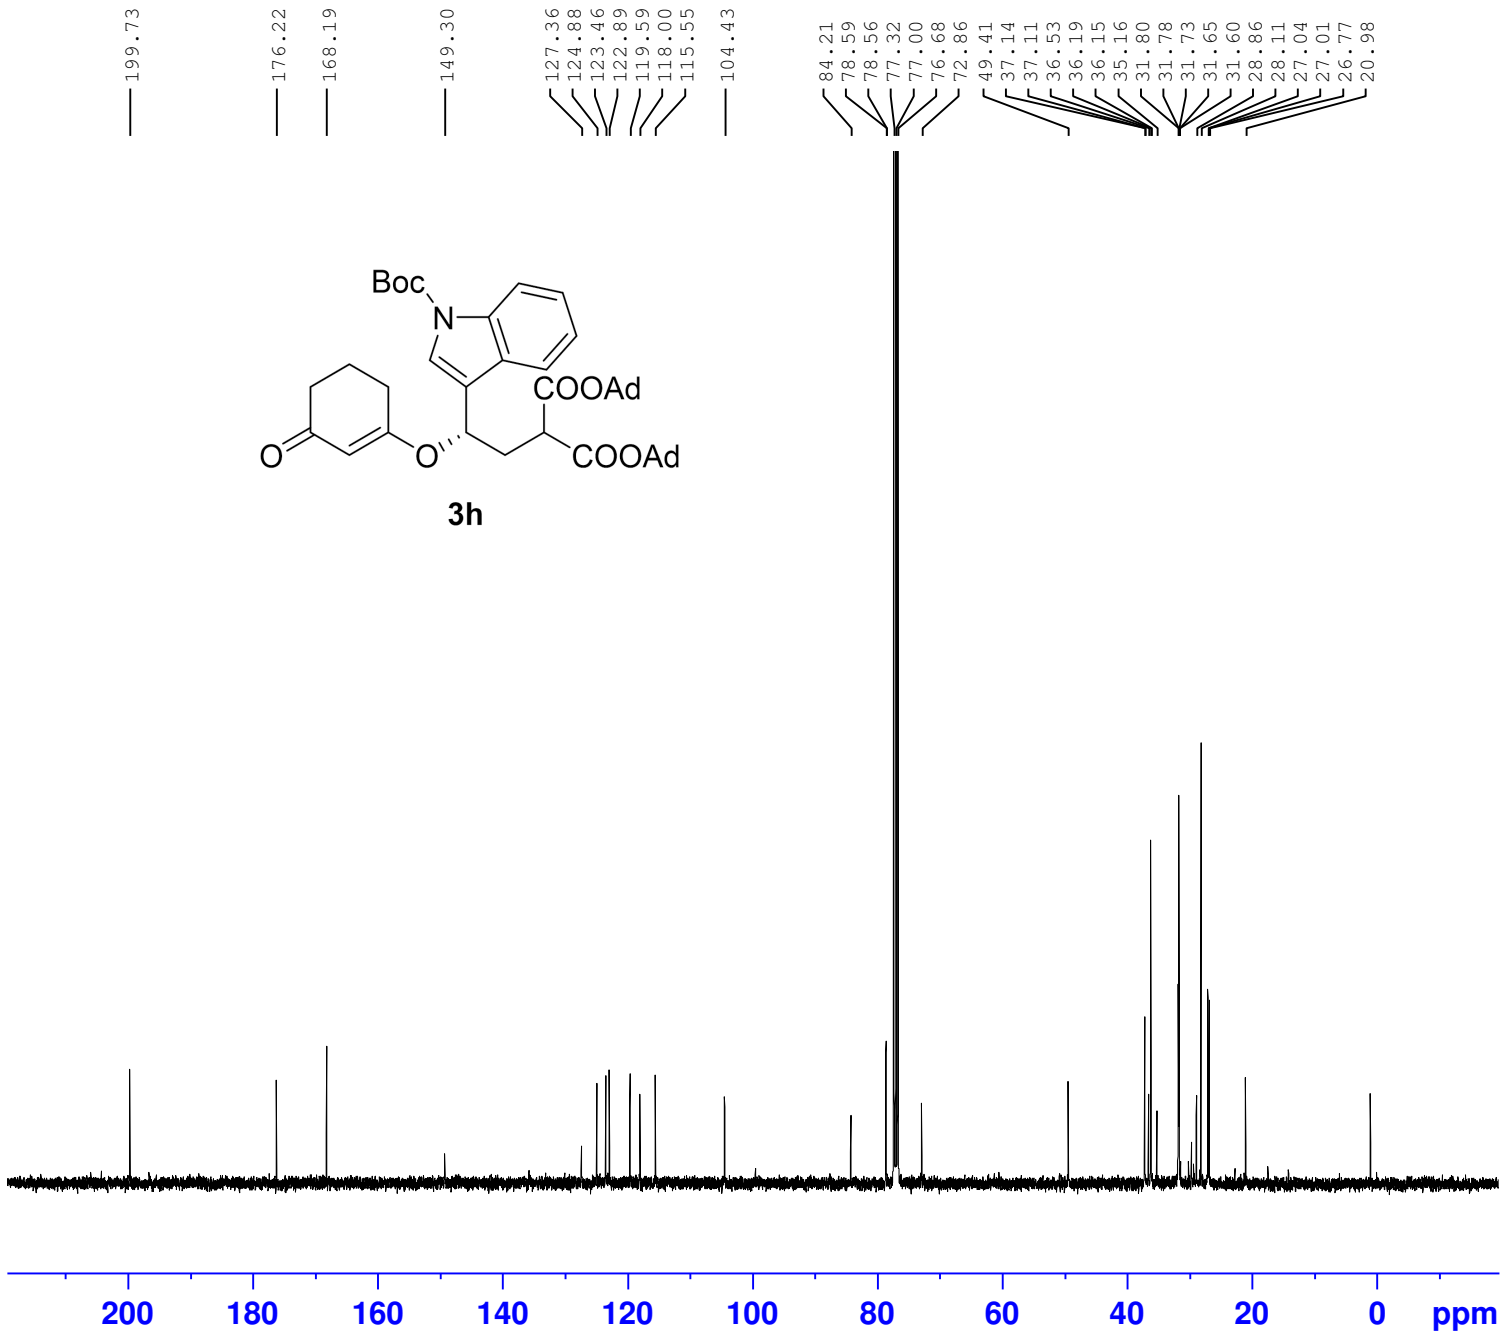

```

Current Data Parameters
NAME      yl-143 rep2
EXPNO     2019121902
PROCNO    1

F2 - Acquisition Parameters
Date_     20191219
Time      18.51
INSTRUM   spect
PROBHD    5 mm PABBO BB-
PULPROG   zgpg30
TD         65536
SOLVENT   CDC13
NS         705
DS         4
SWH        24038.461 Hz
FIDRES     0.366798 Hz
AQ         1.3631488 sec
RG         2050
DW         20.800 usec
DE         6.50 usec
TE         291.8 K
D1         2.00000000 sec
D11        0.03000000 sec
TD0        1

===== CHANNEL f1 =====
NUC1       13C
P1         9.90 usec
PL1        -1.10 dB
PL1W       40.29647064 W
SFO1       100.6328888 MHz

===== CHANNEL f2 =====
CPDPRG[2]  waltz16
NUC2       1H
PCPD2      90.00 usec
PL2        -1.00 dB
PL12       14.68 dB
PL13       17.68 dB
PL2W       10.90985775 W
PL12W      0.29499799 W
PL13W      0.14784923 W
SFO2       400.1716007 MHz

F2 - Processing parameters
SI         32768
SF         100.6228352 MHz
WDW        EM
SSB        0
LB         1.00 Hz
GB         0
PC         1.40

```

7.260  
7.207  
7.185  
6.883  
6.861  
5.120  
5.051  
5.041  
4.981  
4.978  
3.787  
3.546  
3.530  
3.526  
3.509  
2.631  
2.612  
2.609  
2.573  
2.361  
2.352  
2.345  
2.335  
2.328  
1.994  
1.987  
1.979  
1.969  
1.961  
1.953  
1.930  
1.861  
1.855  
1.834  
1.828  
1.822  
1.814  
1.767  
1.717  
1.564  
1.558  
1.543  
1.527  
1.519

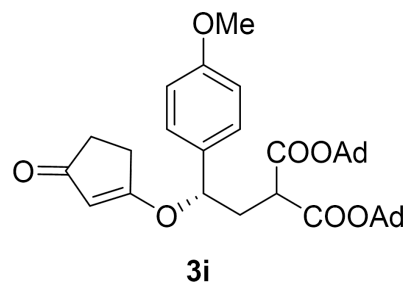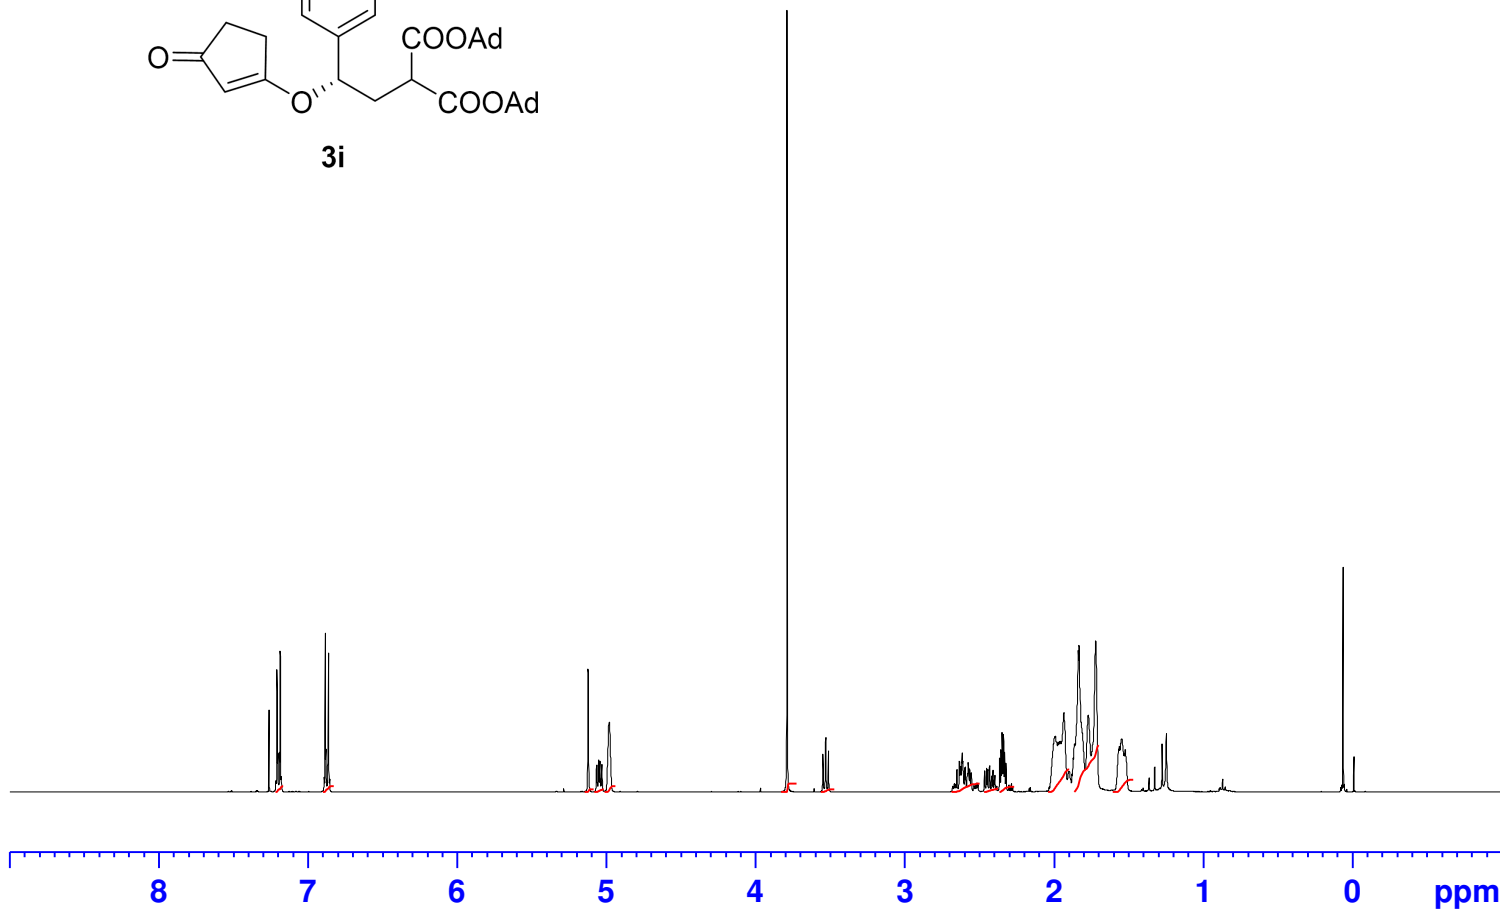

1.99  
2.00  
1.01  
1.00  
2.01  
3.03  
1.00  
3.03  
1.16  
1.89  
7.87  
16.16  
4.20

Current Data Parameters  
NAME yl-164  
EXPNO 2020052701  
PROCNO 1

F2 - Acquisition Parameters  
Date\_ 20200528  
Time 8.45 h  
INSTRUM spect  
PROBHD Z108618\_0256 (  
PULPROG zg30  
TD 65536  
SOLVENT CDCl3  
NS 16  
DS 2  
SWH 8223.685 Hz  
FIDRES 0.250967 Hz  
AQ 3.9845889 sec  
RG 101  
DW 60.800 usec  
DE 6.50 usec  
TE 298.5 K  
D1 1.00000000 sec  
TD0 1  
SFO1 400.1724712 MHz  
NUC1 1H  
P0 3.33 usec  
P1 10.00 usec  
PLW1 15.00000000 W

F2 - Processing parameters  
SI 32768  
SF 400.1700092 MHz  
WDW no  
SSB 0  
LB 0 Hz  
GB 0  
PC 1.00

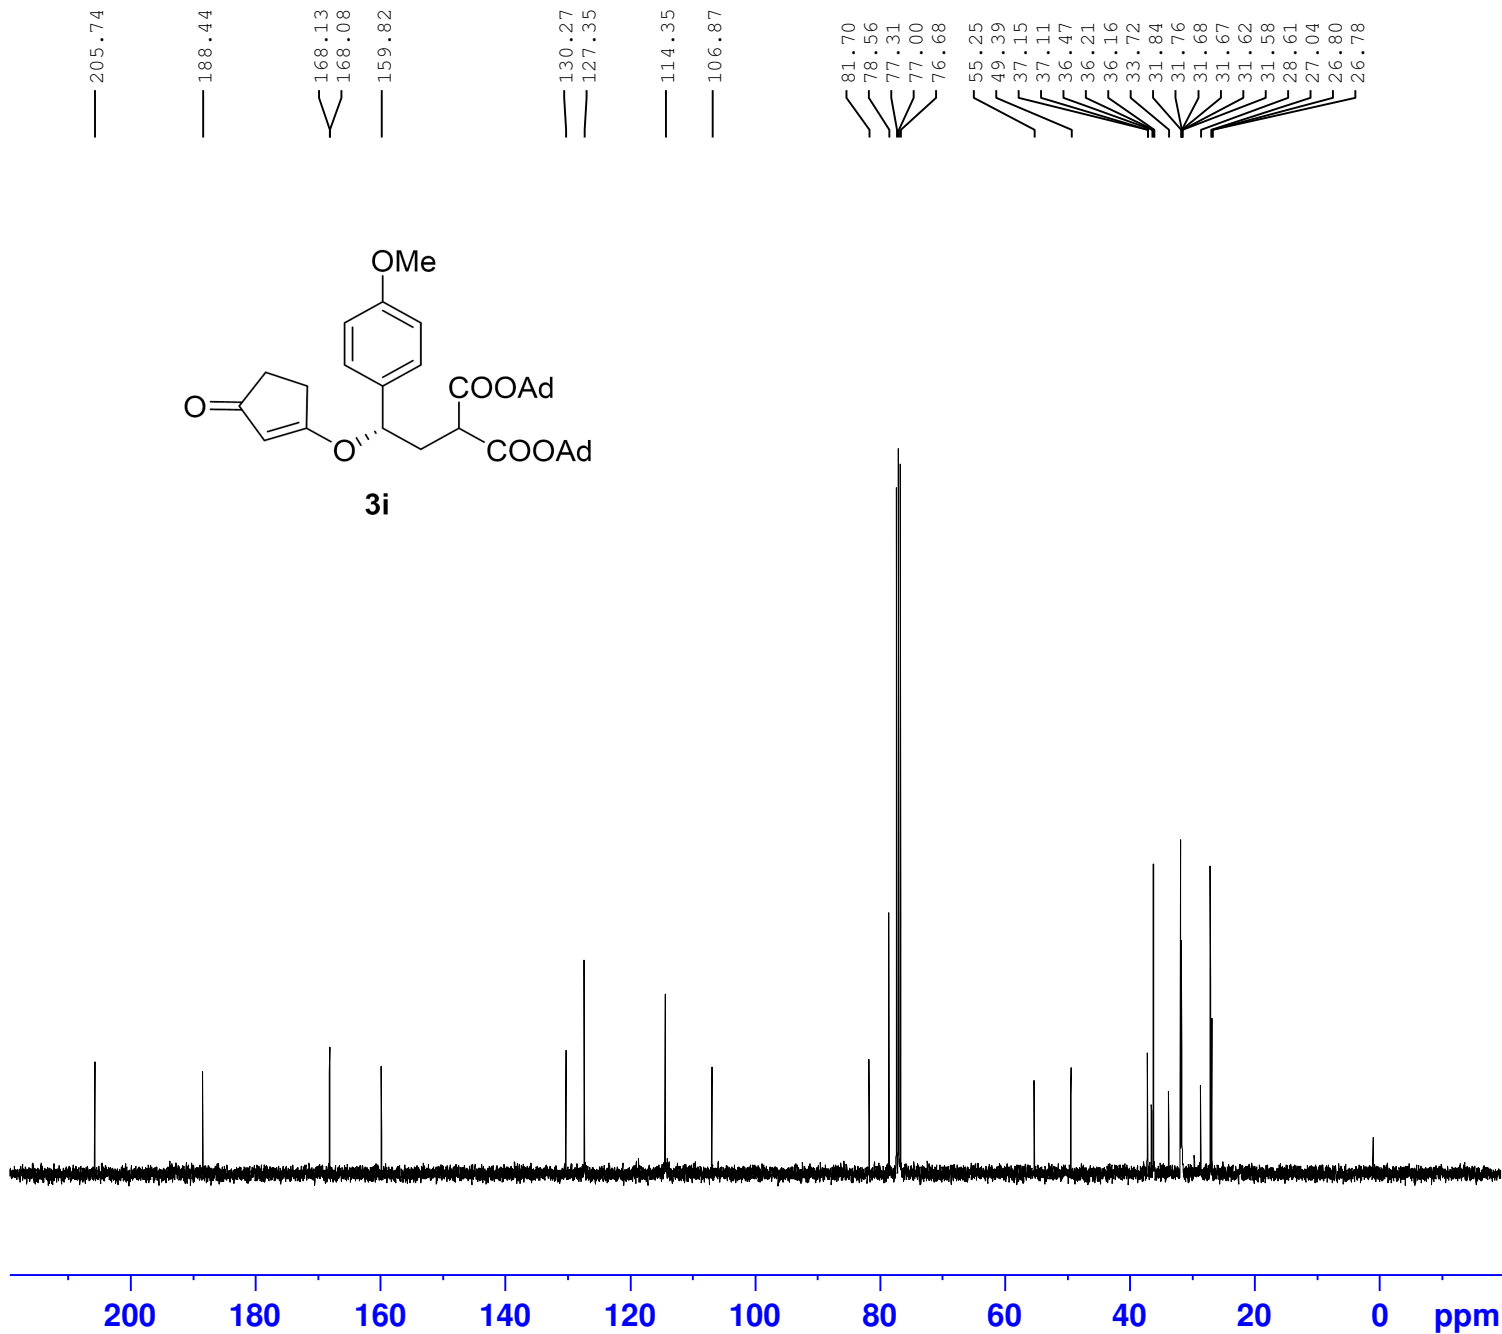

Current Data Parameters  
 NAME yl-164  
 EXPNO 2020052702  
 PROCNO 1

F2 - Acquisition Parameters  
 Date\_ 20200528  
 Time 12.28 h  
 INSTRUM spect  
 PROBHD Z108618\_0256 (  
 PULPROG zgpg30  
 TD 65536  
 SOLVENT CDC13  
 NS 101  
 DS 4  
 SWH 24038.461 Hz  
 FIDRES 0.733596 Hz  
 AQ 1.3631488 sec  
 RG 2050  
 DW 20.800 usec  
 DE 6.50 usec  
 TE 298.0 K  
 D1 2.00000000 sec  
 D11 0.03000000 sec  
 TD0 1  
 SFO1 100.6328888 MHz  
 NUC1 13C  
 P0 3.33 usec  
 P1 10.00 usec  
 PLW1 50.00000000 W  
 SFO2 400.1716007 MHz  
 NUC2 1H  
 CPDPRG[2] waltz65  
 PCPD2 90.00 usec  
 PLW2 15.00000000 W  
 PLW12 0.18519001 W  
 PLW13 0.09314700 W

F2 - Processing parameters  
 SI 32768  
 SF 100.6228330 MHz  
 WDW EM  
 SSB 0  
 LB 1.00 Hz  
 GB 0  
 PC 1.40

7.146  
7.124  
6.843  
6.821  
5.133  
5.036  
5.024  
5.015  
5.002  
4.953  
3.755  
3.512  
3.496  
3.491  
3.475  
2.494  
2.478  
2.473  
2.395  
2.386  
2.373  
2.345  
2.302  
2.240  
2.197  
2.086  
2.079  
1.973  
1.950  
1.926  
1.895  
1.842  
1.835  
1.808  
1.802  
1.795  
1.744  
1.710  
1.691  
1.539  
1.514  
1.488  
1.029  
0.956

Current Data Parameters  
NAME yl-163  
EXPNO 2020010301  
PROCNO 1

F2 - Acquisition Parameters  
Date\_ 20200103  
Time 17.42  
INSTRUM spect  
PROBHD 5 mm PABBO BB-  
PULPROG zg30  
TD 65536  
SOLVENT CDCl3  
NS 16  
DS 2  
SWH 8223.685 Hz  
FIDRES 0.125483 Hz  
AQ 3.9845889 sec  
RG 28.5  
DW 60.800 usec  
DE 6.50 usec  
TE 300.0 K  
D1 1.00000000 sec  
TD0 1

==== CHANNEL f1 =====  
NUC1 1H  
P1 14.80 usec  
PL1 -1.00 dB  
PL1W 10.90985775 W  
SFO1 400.1724712 MHz

F2 - Processing parameters  
SI 32768  
SF 400.1700152 MHz  
WDW no  
SSB 0  
LB 0 Hz  
GB 0  
PC 1.00

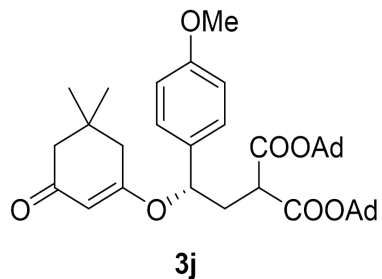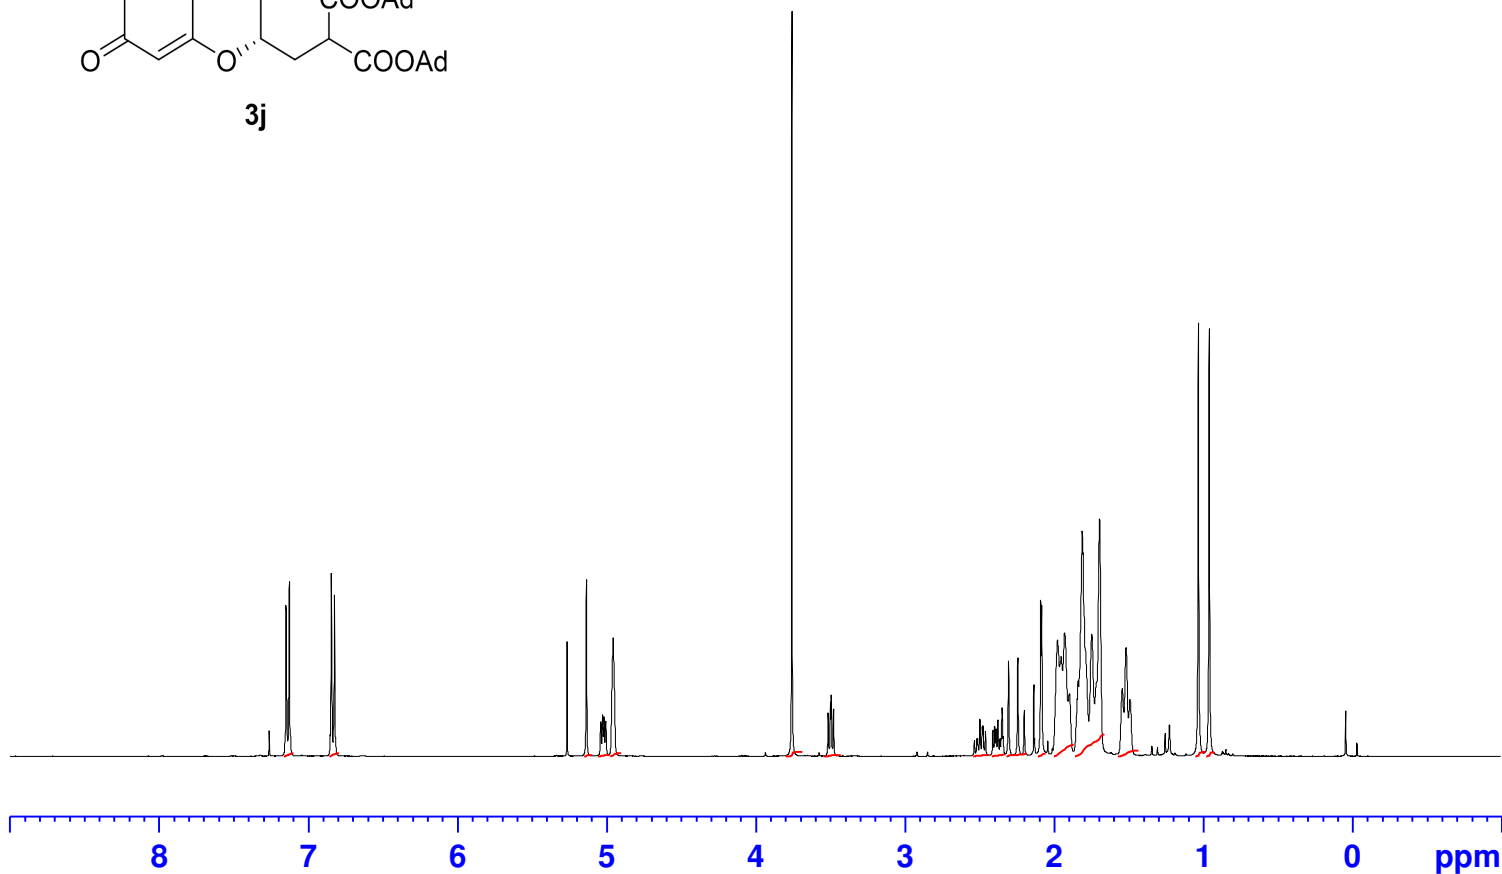

2.00  
2.00  
1.01  
1.01  
2.01  
3.03  
1.00  
1.01  
1.32  
1.77  
1.88  
8.44  
16.11  
4.08  
3.00  
2.97

199.17  
 174.35  
 168.15  
 168.11  
 159.47  
 130.90  
 126.87  
 114.26  
 103.92

78.41  
 77.97  
 77.32  
 77.00  
 76.68  
 55.18  
 50.49  
 49.38  
 42.86  
 37.13  
 37.10  
 36.92  
 36.17  
 36.13  
 32.32  
 31.79  
 31.73  
 31.65  
 31.59  
 28.31  
 27.90  
 27.02  
 26.77

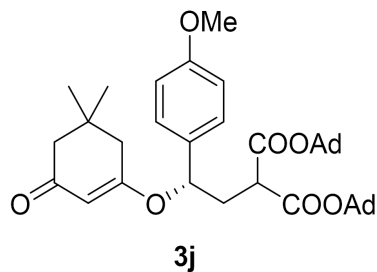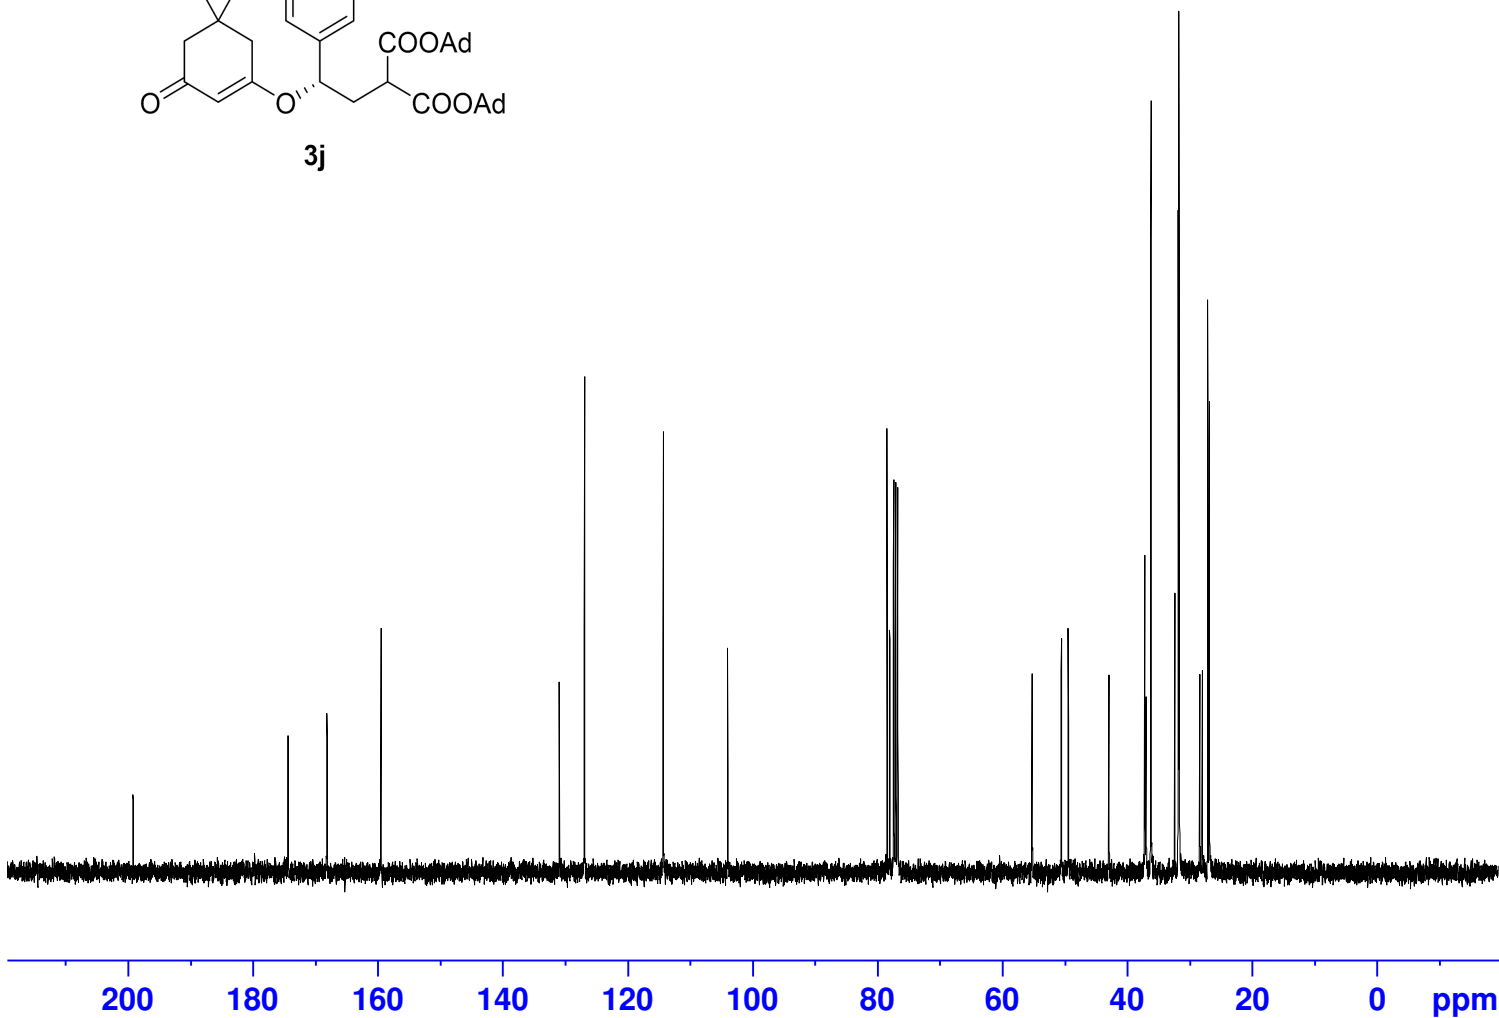

Current Data Parameters  
 NAME yl-163  
 EXPNO 20200527  
 PROCNO 1

F2 - Acquisition Parameters  
 Date\_ 20200528  
 Time 6.14 h  
 INSTRUM spect  
 PROBHD z108618\_0256 (  
 PULPROG zgpg30  
 TD 65536  
 SOLVENT CDC13  
 NS 150  
 DS 4  
 SWH 24038.461 Hz  
 FIDRES 0.733596 Hz  
 AQ 1.3631488 sec  
 RG 2050  
 DW 20.800 usec  
 DE 6.50 usec  
 TE 298.9 K  
 D1 2.00000000 sec  
 D11 0.03000000 sec  
 TD0 1  
 SFO1 100.6328888 MHz  
 NUC1 13C  
 P0 3.33 usec  
 P1 10.00 usec  
 PLW1 50.00000000 W  
 SFO2 400.1716007 MHz  
 NUC2 1H  
 CPDPRG[2] waltz65  
 PCPD2 90.00 usec  
 PLW2 15.00000000 W  
 PLW12 0.18519001 W  
 PLW13 0.09314700 W

F2 - Processing parameters  
 SI 32768  
 SF 100.6228351 MHz  
 WDW EM  
 SSB 0  
 LB 1.00 Hz  
 GB 0  
 PC 1.40

7.268  
7.266  
7.260  
7.256  
7.254  
6.984  
6.977  
6.954  
6.945  
6.942  
6.933  
5.434  
5.421  
5.413  
5.400  
5.327  
4.984  
4.977  
3.538  
3.520  
3.518  
3.500  
2.641  
2.624  
2.621  
2.516  
2.495  
2.349  
2.306  
2.250  
2.207  
2.161  
2.134  
1.995  
1.954  
1.923  
1.828  
1.765  
1.715  
1.562  
1.539  
1.514  
1.054  
0.992

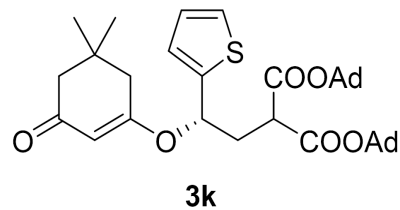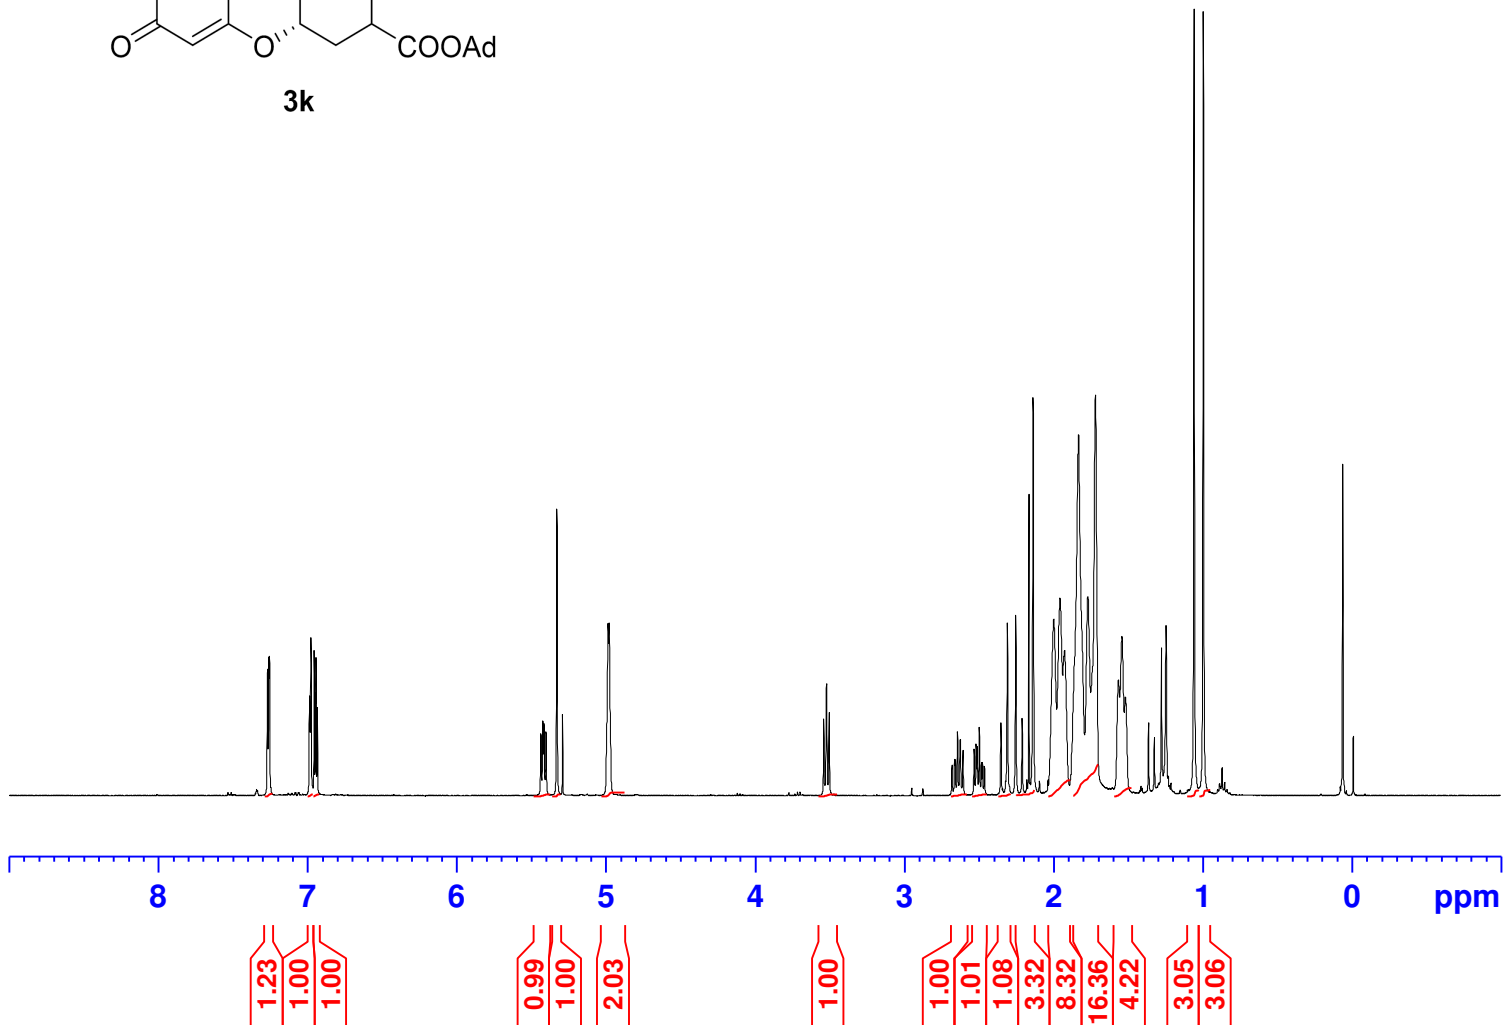

Current Data Parameters  
NAME yl-166  
EXPNO 2020010301  
PROCNO 1

F2 - Acquisition Parameters  
Date\_ 20200103  
Time 17.47  
INSTRUM spect  
PROBHD 5 mm PABBO BB-  
PULPROG zg30  
TD 65536  
SOLVENT CDCl3  
NS 16  
DS 2  
SWH 8223.685 Hz  
FIDRES 0.125483 Hz  
AQ 3.9845889 sec  
RG 80.6  
DW 60.800 usec  
DE 6.50 usec  
TE 300.0 K  
D1 1.00000000 sec  
TDO 1

===== CHANNEL f1 =====  
NUC1 1H  
P1 14.80 usec  
PL1 -1.00 dB  
PL1W 10.90985775 W  
SFO1 400.1724712 MHz

F2 - Processing parameters  
SI 32768  
SF 400.1700155 MHz  
WDW no  
SSB 0  
LB 0 Hz  
GB 0  
PC 1.00

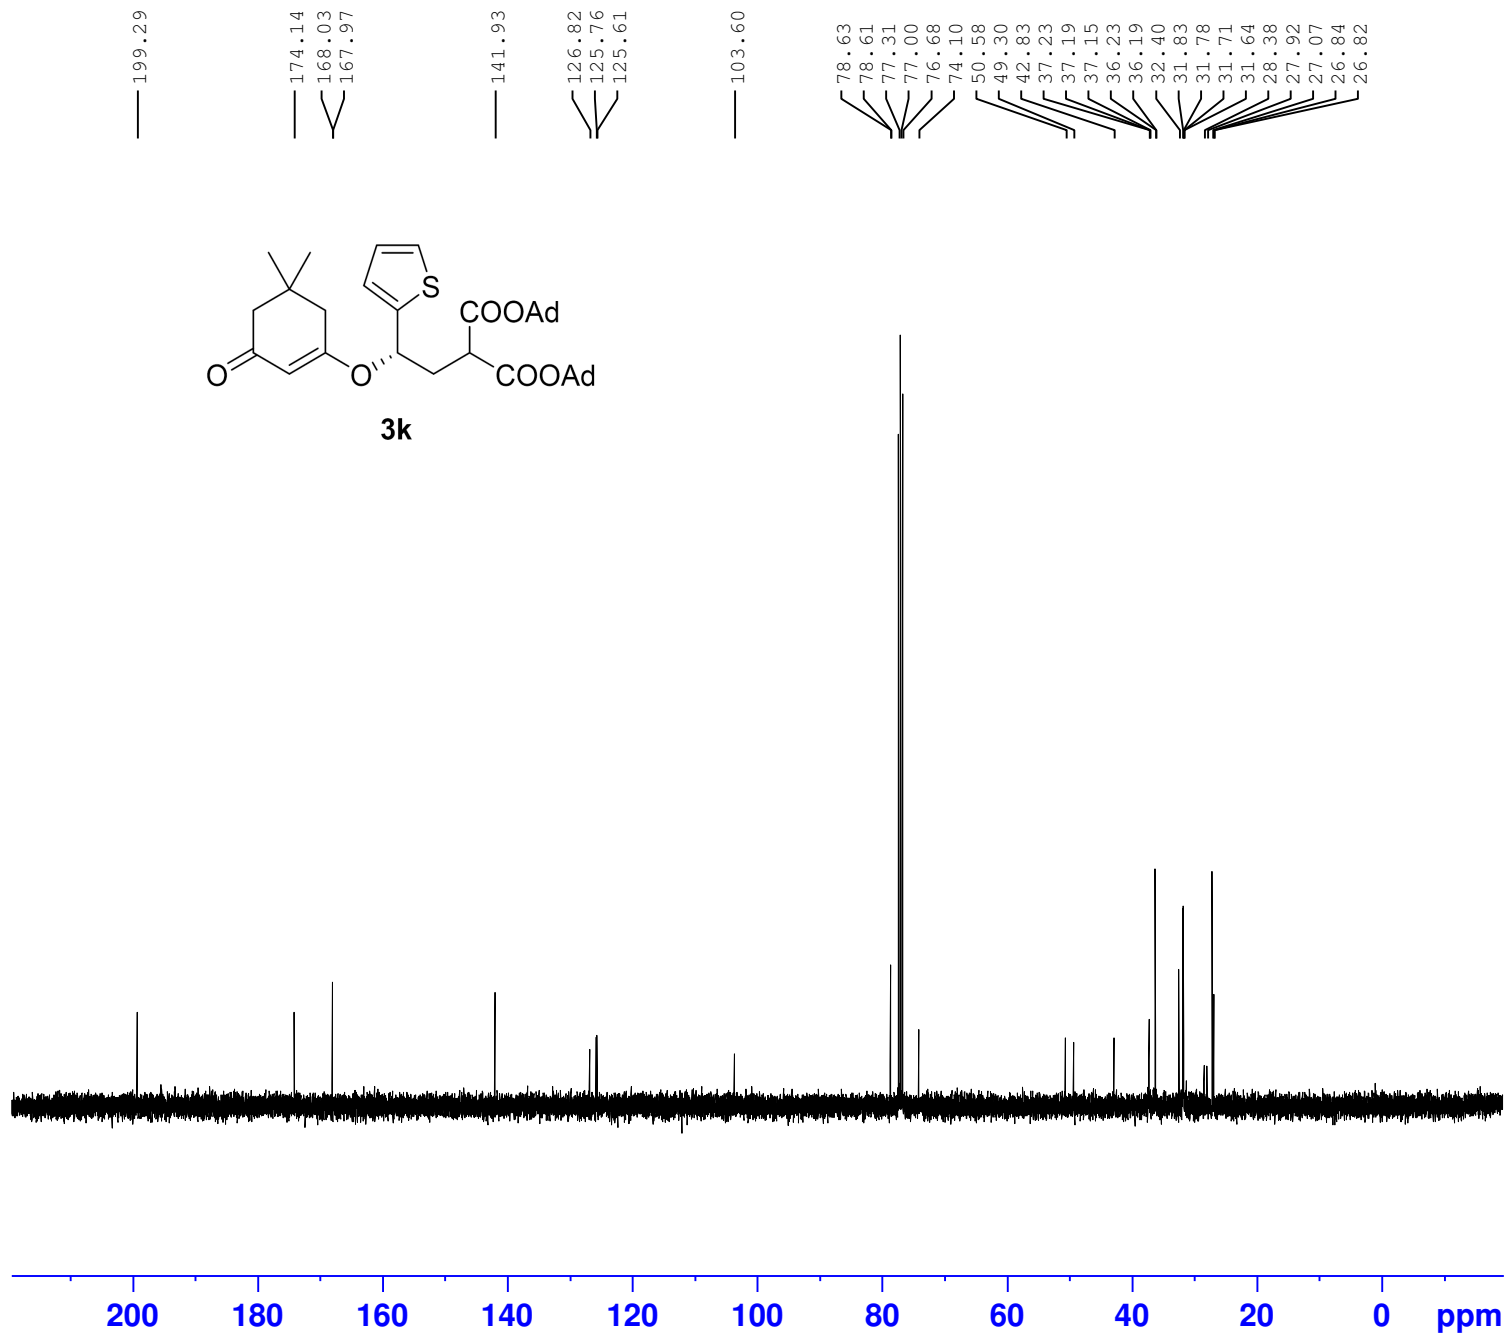

Current Data Parameters  
 NAME yl-166  
 EXPNO 20200527  
 PROCNO 1

F2 - Acquisition Parameters  
 Date\_ 20200528  
 Time 6.27 h  
 INSTRUM spect  
 PROBHD Z108618\_0256 (  
 PULPROG zgpg30  
 TD 65536  
 SOLVENT CDC13  
 NS 150  
 DS 4  
 SWH 24038.461 Hz  
 FIDRES 0.733596 Hz  
 AQ 1.3631488 sec  
 RG 2050  
 DW 20.800 usec  
 DE 6.50 usec  
 TE 299.0 K  
 D1 2.00000000 sec  
 D11 0.03000000 sec  
 TD0 1  
 SFO1 100.6328888 MHz  
 NUC1 13C  
 P0 3.33 usec  
 P1 10.00 usec  
 PLW1 50.00000000 W  
 SFO2 400.1716007 MHz  
 NUC2 1H  
 CPDPRG[2] waltz65  
 PCPD2 90.00 usec  
 PLW2 15.00000000 W  
 PLW12 0.18519001 W  
 PLW13 0.09314700 W

F2 - Processing parameters  
 SI 32768  
 SF 100.6228308 MHz  
 WDW no  
 SSB 0  
 LB 0 Hz  
 GB 0  
 PC 1.40

7.639  
7.620  
7.469  
7.323  
7.321  
7.260  
7.243  
7.241  
7.223  
7.221  
5.314  
4.997  
4.988  
4.978  
3.631  
3.615  
3.609  
3.594  
2.359  
2.296  
2.121  
2.108  
1.997  
1.989  
1.980  
1.959  
1.951  
1.944  
1.935  
1.920  
1.834  
1.819  
1.811  
1.804  
1.773  
1.744  
1.737  
1.719  
1.664  
1.550  
1.534  
1.511  
1.066  
0.951

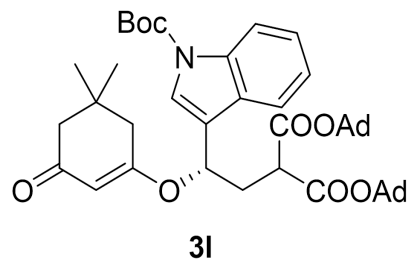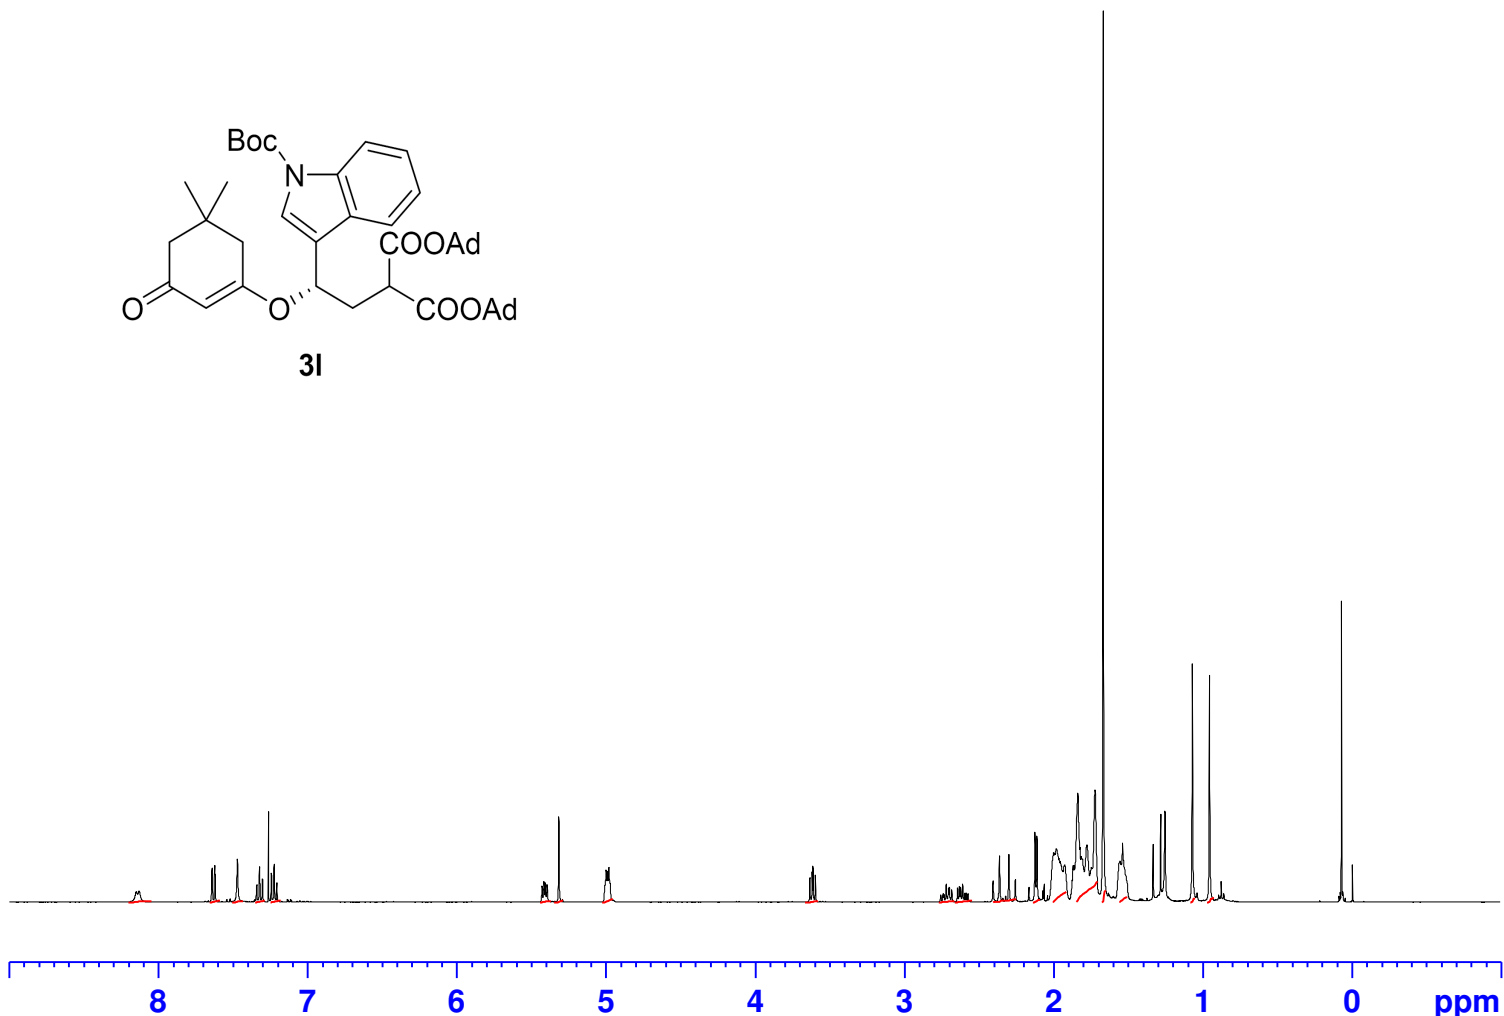

1.00  
1.08  
1.04  
1.12  
1.13  
1.06  
1.08  
2.22  
1.07  
1.08  
1.12  
2.37  
1.95  
8.37  
16.68  
9.29  
4.30  
3.19  
3.20

Current Data Parameters  
NAME yl-169  
EXPNO 2020052701  
PROCNO 1

F2 - Acquisition Parameters  
Date\_ 20200528  
Time 8.50 h  
INSTRUM spect  
PROBHD Z108618\_0256 (  
PULPROG zg30  
TD 65536  
SOLVENT CDCl3  
NS 16  
DS 2  
SWH 8223.685 Hz  
FIDRES 0.250967 Hz  
AQ 3.9845889 sec  
RG 101  
DW 60.800 usec  
DE 6.50 usec  
TE 298.4 K  
D1 1.00000000 sec  
TD0 1  
SFO1 400.1724712 MHz  
NUC1 1H  
P0 3.33 usec  
P1 10.00 usec  
PLW1 15.00000000 W

F2 - Processing parameters  
SI 32768  
SF 400.1700092 MHz  
WDW no  
SSB 0  
LB 0 Hz  
GB 0  
PC 1.00



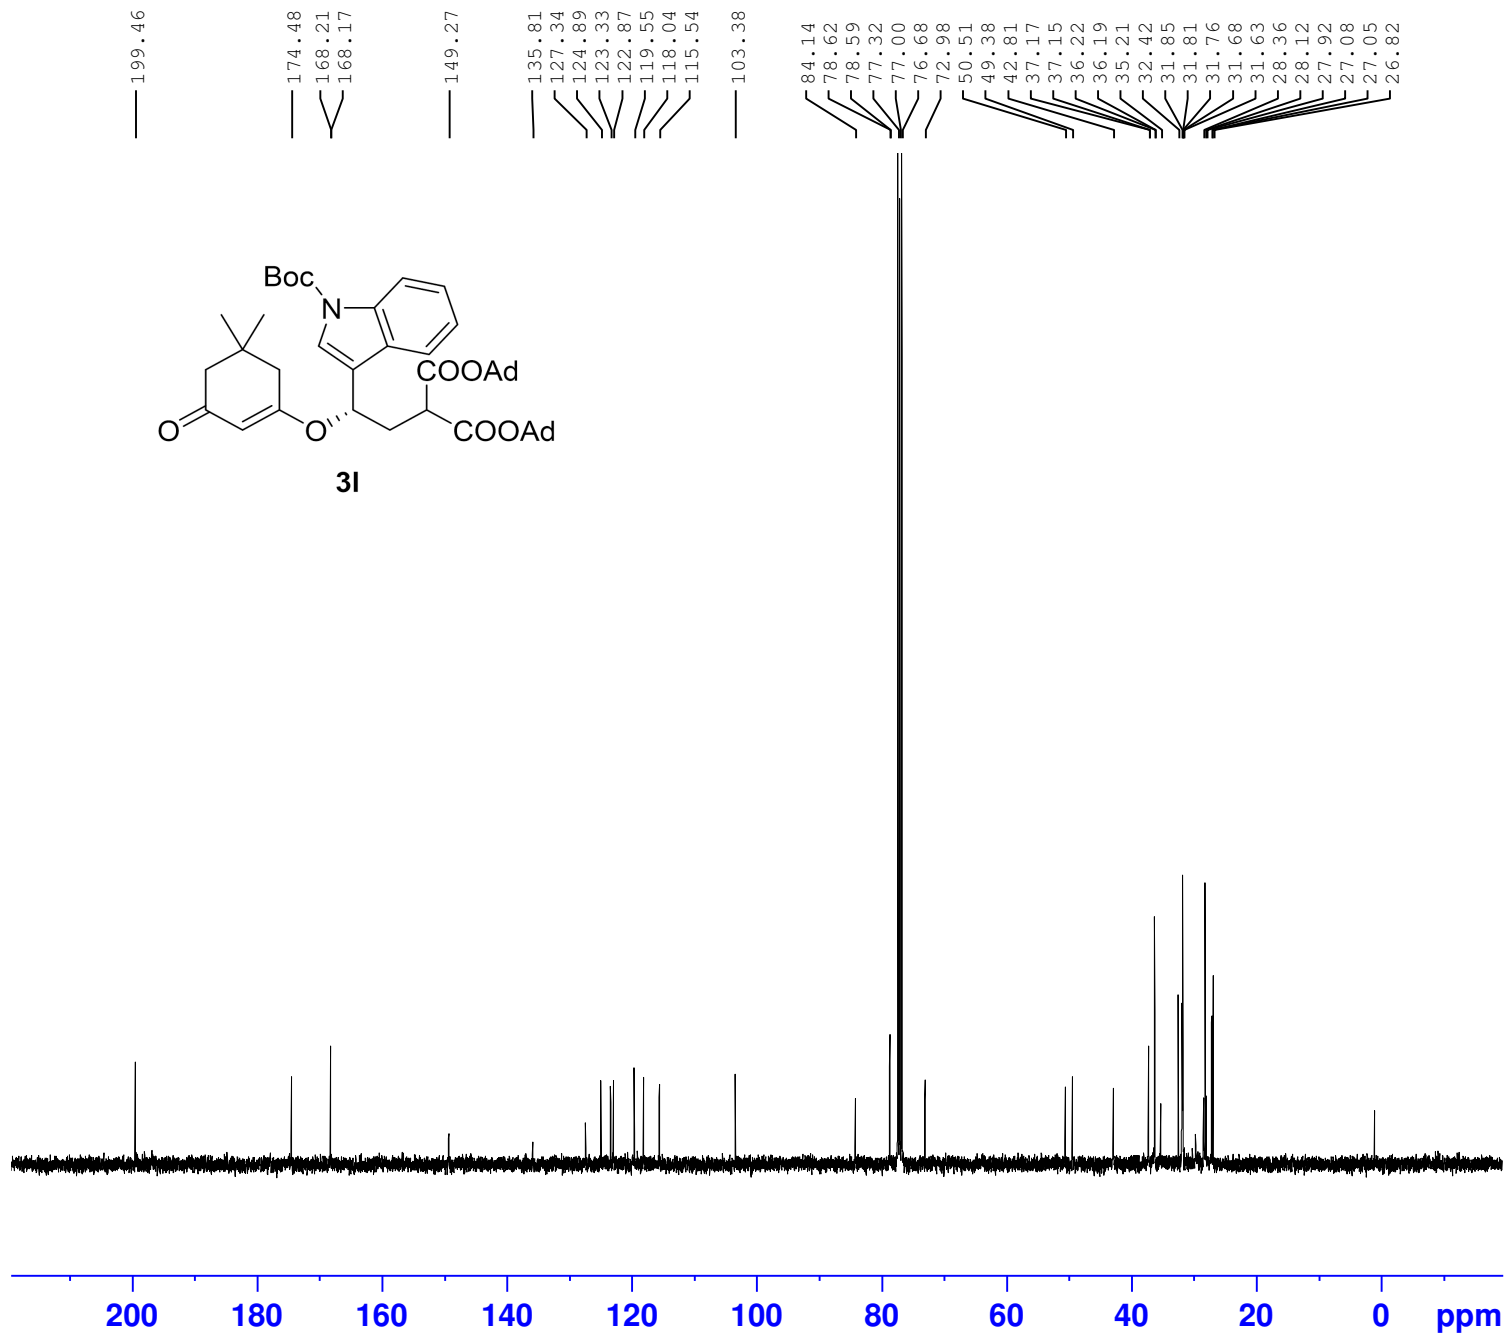

Current Data Parameters  
 NAME yl-169  
 EXPNO 2020052702  
 PROCNO 1

F2 - Acquisition Parameters  
 Date\_ 20200528  
 Time 12.42 h  
 INSTRUM spect  
 PROBHD z108618\_0256 (  
 PULPROG zgpg30  
 TD 65536  
 SOLVENT CDC13  
 NS 200  
 DS 4  
 SWH 24038.461 Hz  
 FIDRES 0.733596 Hz  
 AQ 1.3631488 sec  
 RG 2050  
 DW 20.800 usec  
 DE 6.50 usec  
 TE 298.0 K  
 D1 2.00000000 sec  
 D11 0.03000000 sec  
 TD0 1  
 SFO1 100.6328888 MHz  
 NUC1 13C  
 P0 3.33 usec  
 P1 10.00 usec  
 PLW1 50.00000000 W  
 SFO2 400.1716007 MHz  
 NUC2 1H  
 CPDPRG[2] waltz65  
 PCPD2 90.00 usec  
 PLW2 15.00000000 W  
 PLW12 0.18519001 W  
 PLW13 0.09314700 W

F2 - Processing parameters  
 SI 32768  
 SF 100.6228315 MHz  
 WDW EM  
 SSB 0  
 LB 1.00 Hz  
 GB 0  
 PC 1.40

# ==== Analysis Report ====

Sample Name : yl-133rac  
Sample ID :  
Data Filename : yl-133rac001.lcd  
Method Filename : ipa\_hex5\_95\_254\_30min.lcm  
Batch Filename :  
Vial # : 2-36  
Injection Volume : 10 uL  
Date Acquired : 2019/12/19 20:06:25  
Date Processed : 2019/12/19 20:24:54  
Acquired by : System Administrator  
Processed by : System Administrator

<Chromatogram>

mV

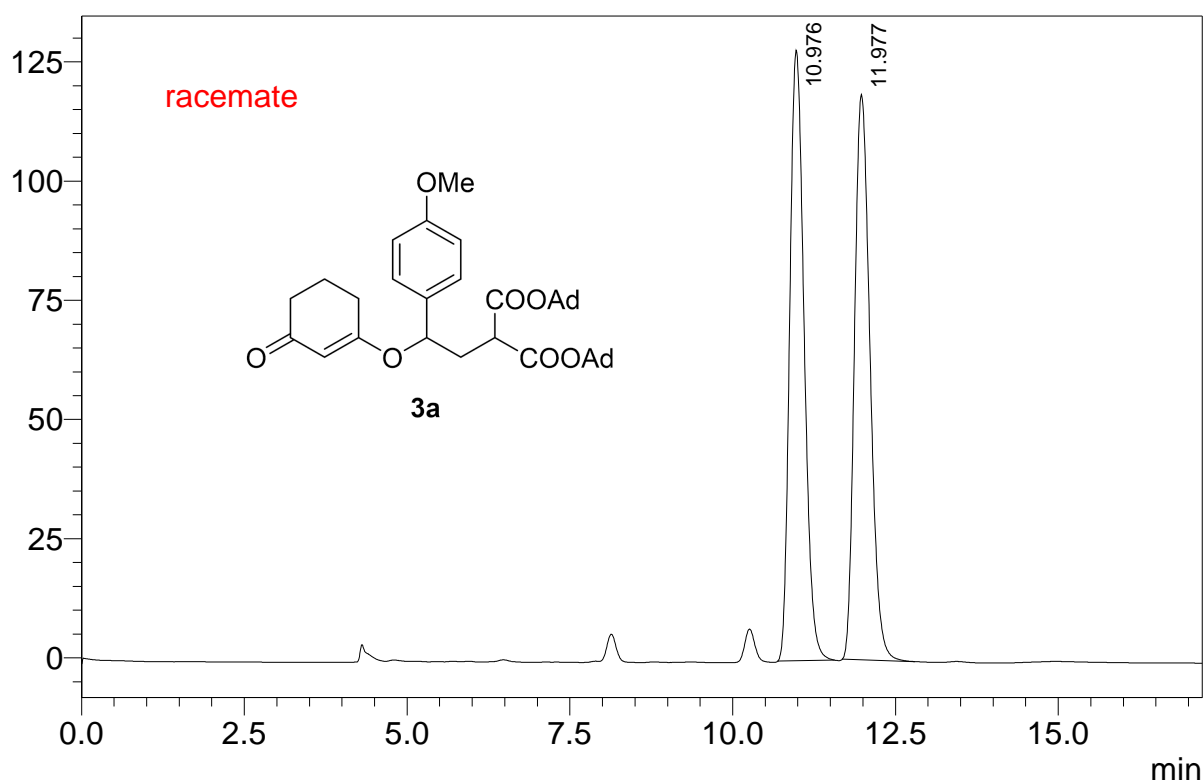

<Peak Table>

检测器A 254nm

| Peak# | Ret. Time | Area    | Height | Aera %  |
|-------|-----------|---------|--------|---------|
| 1     | 10.976    | 1966056 | 128008 | 50.022  |
| 2     | 11.977    | 1964307 | 118541 | 49.978  |
| 总计    |           | 3930363 | 246549 | 100.000 |

# ==== Analysis Report ====

Sample Name : yl-133chr  
 Sample ID :  
 Data Filename : yl-133chr002.lcd  
 Method Filename : ipa\_hex5\_95\_254\_30min.lcm  
 Batch Filename :  
 Vial # : 2-35  
 Injection Volume : 10 uL  
 Date Acquired : 2019/12/19 20:24:23  
 Date Processed : 2019/12/19 20:42:43  
 Acquired by : System Administrator  
 Processed by : System Administrator

## <Chromatogram>

mV

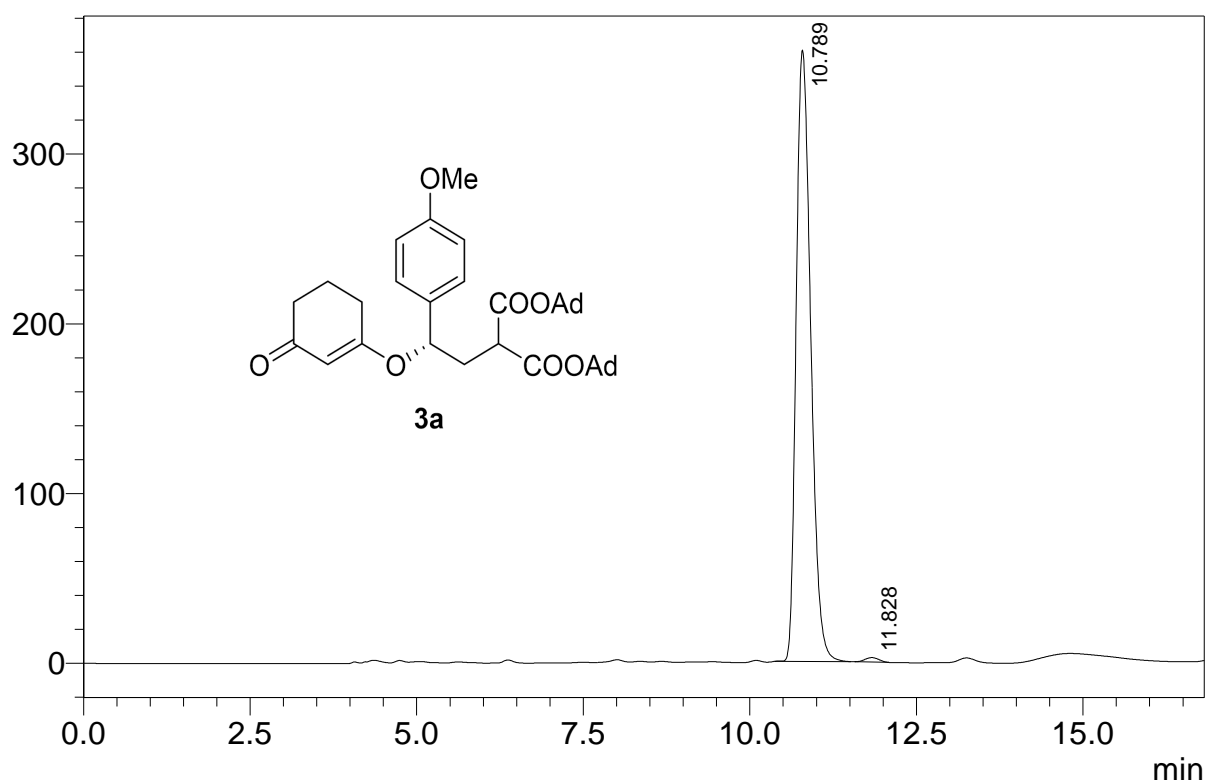

## <Peak Table>

检测器A 254nm

| Peak# | Ret. Time | Area    | Height | Aera %  |
|-------|-----------|---------|--------|---------|
| 1     | 10.789    | 5479098 | 360139 | 99.315  |
| 2     | 11.828    | 37817   | 2630   | 0.685   |
| 总计    |           | 5516915 | 362769 | 100.000 |

# ==== Analysis Report ====

Sample Name : zjc-130 rac  
Sample ID :  
Data Filename : zjc-130 rac001.lcd  
Method Filename : ipa\_hex20\_80\_254\_25min.lcm  
Batch Filename :  
Vial # : 2-1  
Injection Volume : 10 uL  
Date Acquired : 2019/11/27 20:28:31  
Date Processed : 2019/11/27 20:41:07  
Acquired by : System Administrator  
Processed by : System Administrator

<Chromatogram>

mV

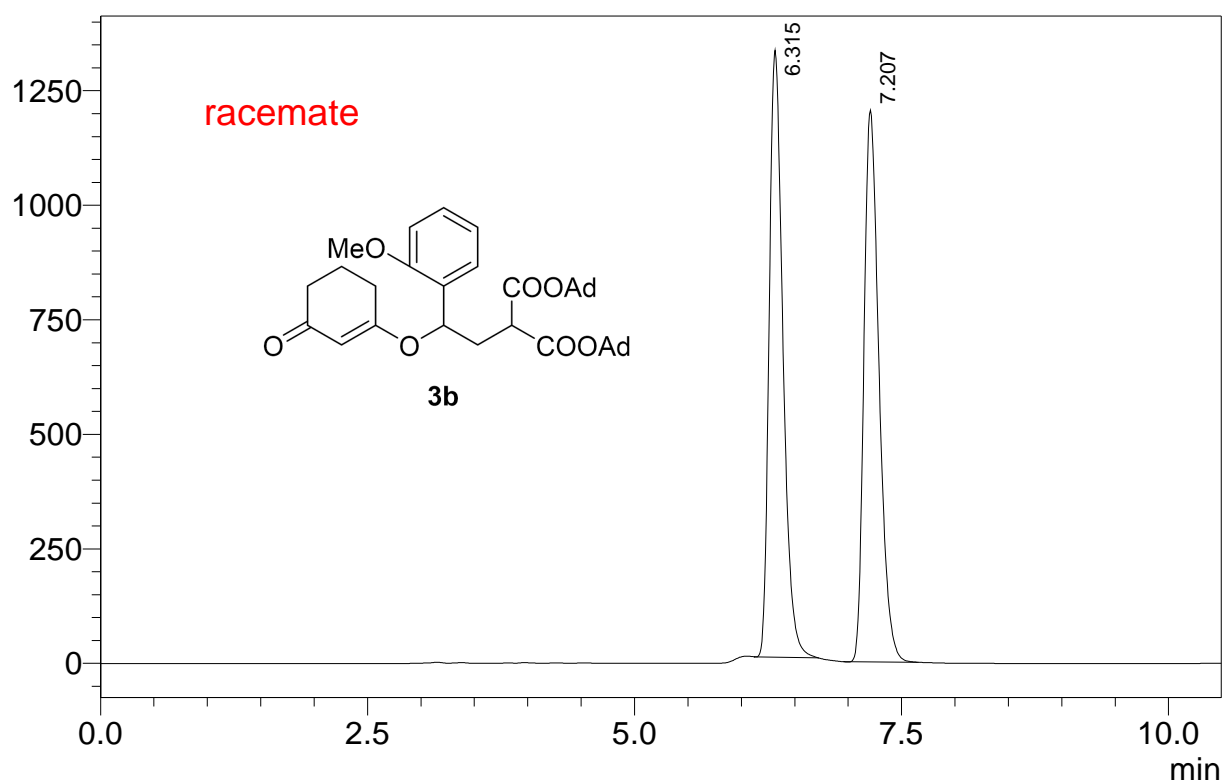

<Peak Table>

检测器A 254nm

| Peak# | Ret. Time | Area     | Height  | Aera %  |
|-------|-----------|----------|---------|---------|
| 1     | 6.315     | 11880669 | 1324628 | 50.068  |
| 2     | 7.207     | 11848397 | 1204164 | 49.932  |
| 总计    |           | 23729066 | 2528792 | 100.000 |

# ==== Analysis Report ====

Sample Name : zjc-130 chro rep  
 Sample ID :  
 Data Filename : zjc-130 chro rep001.lcd  
 Method Filename : ipa\_hex20\_80\_254\_25min.lcm  
 Batch Filename :  
 Vial # : 2-9  
 Injection Volume : 10 uL  
 Date Acquired : 2019/12/11 20:04:39  
 Date Processed : 2020/6/30 14:46:13  
 Acquired by : System Administrator  
 Processed by : System Administrator

## <Chromatogram>

mV

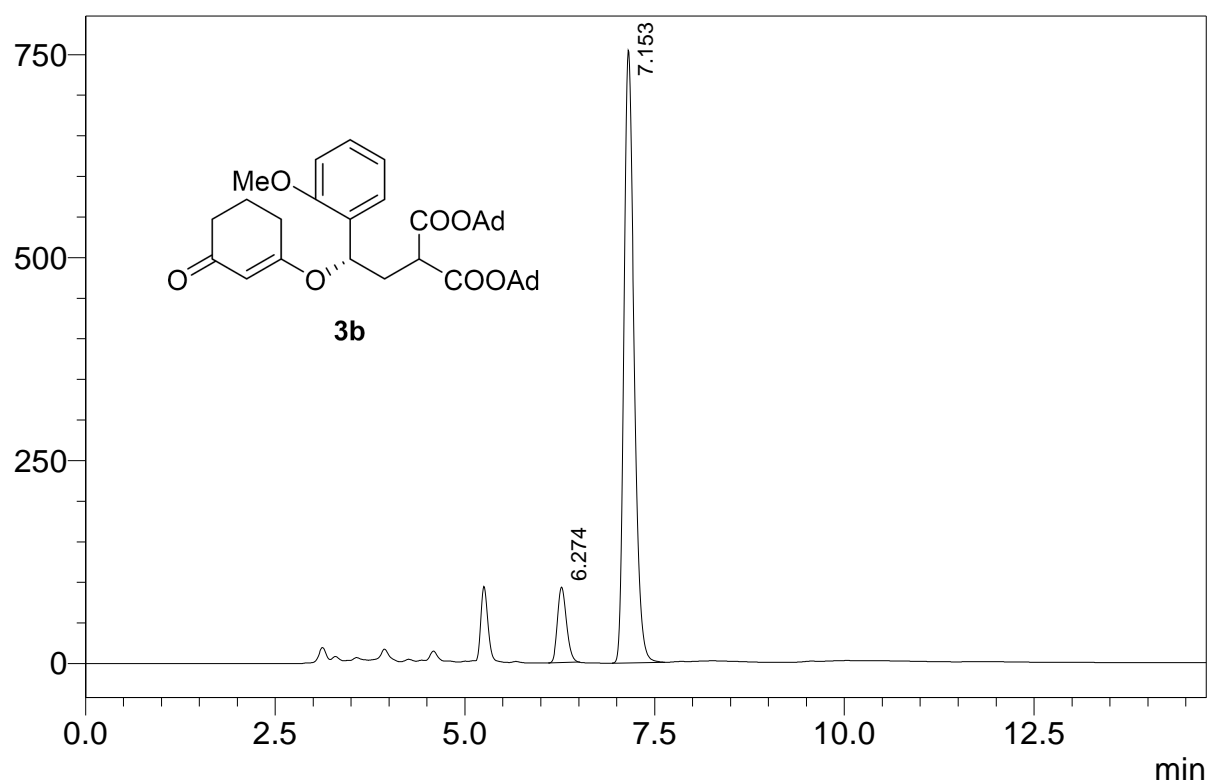

## <Peak Table>

检测器A 254nm

| Peak# | Ret. Time | Area    | Height | Aera %  |
|-------|-----------|---------|--------|---------|
| 1     | 6.274     | 764698  | 93111  | 9.826   |
| 2     | 7.153     | 7018078 | 754487 | 90.174  |
| 总计    |           | 7782776 | 847598 | 100.000 |

# ==== Analysis Report ====

Sample Name : zjc-114 rac  
Sample ID :  
Data Filename : zjc-114 rac004.lcd  
Method Filename : ipa\_hex\_2\_98\_254.lcm  
Batch Filename :  
Vial # : 2-10  
Injection Volume : 10 uL  
Date Acquired : 2019/12/17 10:48:56  
Date Processed : 2020/6/30 14:51:31  
Acquired by : System Administrator  
Processed by : System Administrator

<Chromatogram>

mV

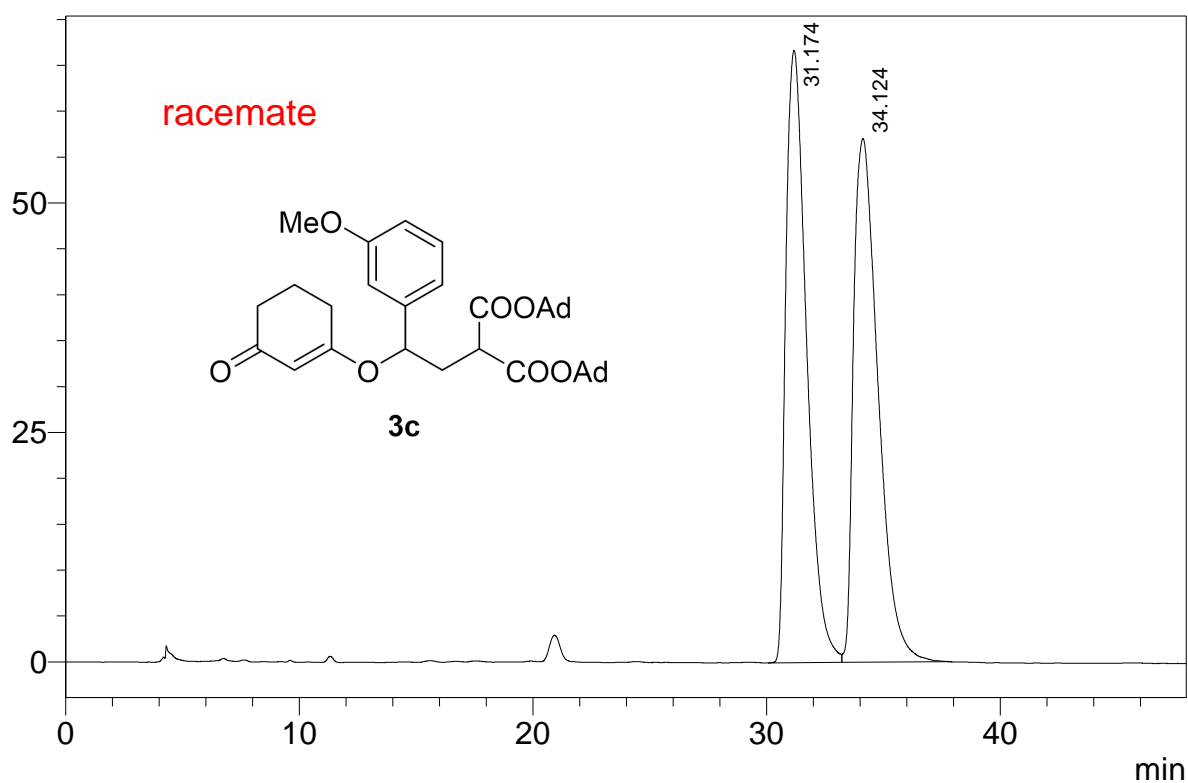

<Peak Table>

检测器A 254nm

| Peak# | Ret. Time | Area    | Height | Aera %  |
|-------|-----------|---------|--------|---------|
| 1     | 31.174    | 4137996 | 66732  | 49.749  |
| 2     | 34.124    | 4179829 | 57064  | 50.251  |
| 总计    |           | 8317825 | 123796 | 100.000 |

# ==== Analysis Report ====

Sample Name : zjc-114 chro  
 Sample ID :  
 Data Filename : zjc-114 chro002.lcd  
 Method Filename : ipa\_hex\_2\_98\_254.lcm  
 Batch Filename :  
 Vial # : 2-11  
 Injection Volume : 10 uL  
 Date Acquired : 2019/12/17 11:38:13  
 Date Processed : 2019/12/17 14:22:43  
 Acquired by : System Administrator  
 Processed by : System Administrator

## <Chromatogram>

mV

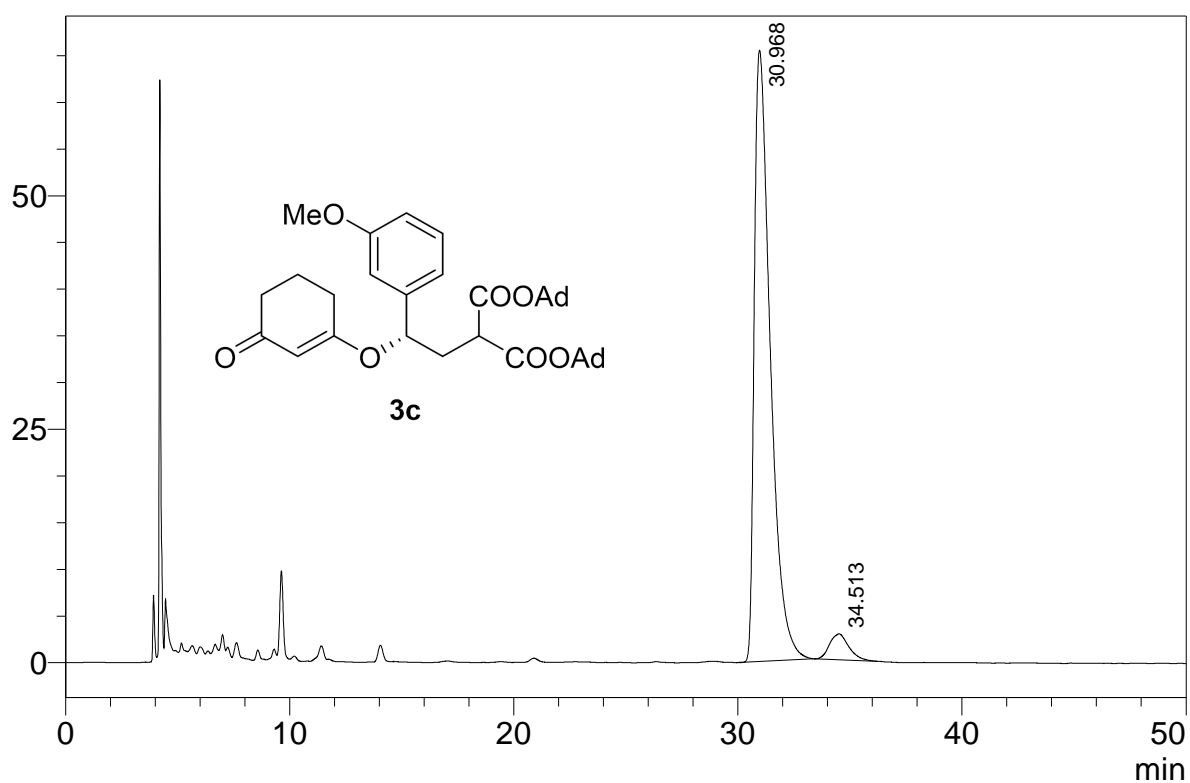

## <Peak Table>

检测器A 254nm

| Peak# | Ret. Time | Area    | Height | Aera %  |
|-------|-----------|---------|--------|---------|
| 1     | 30.968    | 3251159 | 65434  | 95.126  |
| 2     | 34.513    | 166581  | 2786   | 4.874   |
| 总计    |           | 3417741 | 68220  | 100.000 |

# ==== Analysis Report ====

Sample Name : yl-121-rac  
Sample ID :  
Data Filename : yl-121-rac-001.lcd  
Method Filename : ipa\_hex5\_95\_254\_30min.lcm  
Batch Filename :  
Vial # : 1-41  
Injection Volume : 10 uL  
Date Acquired : 2019/11/1 21:24:16  
Date Processed : 2019/11/1 22:13:15  
Acquired by : System Administrator  
Processed by : System Administrator

<Chromatogram>

mV

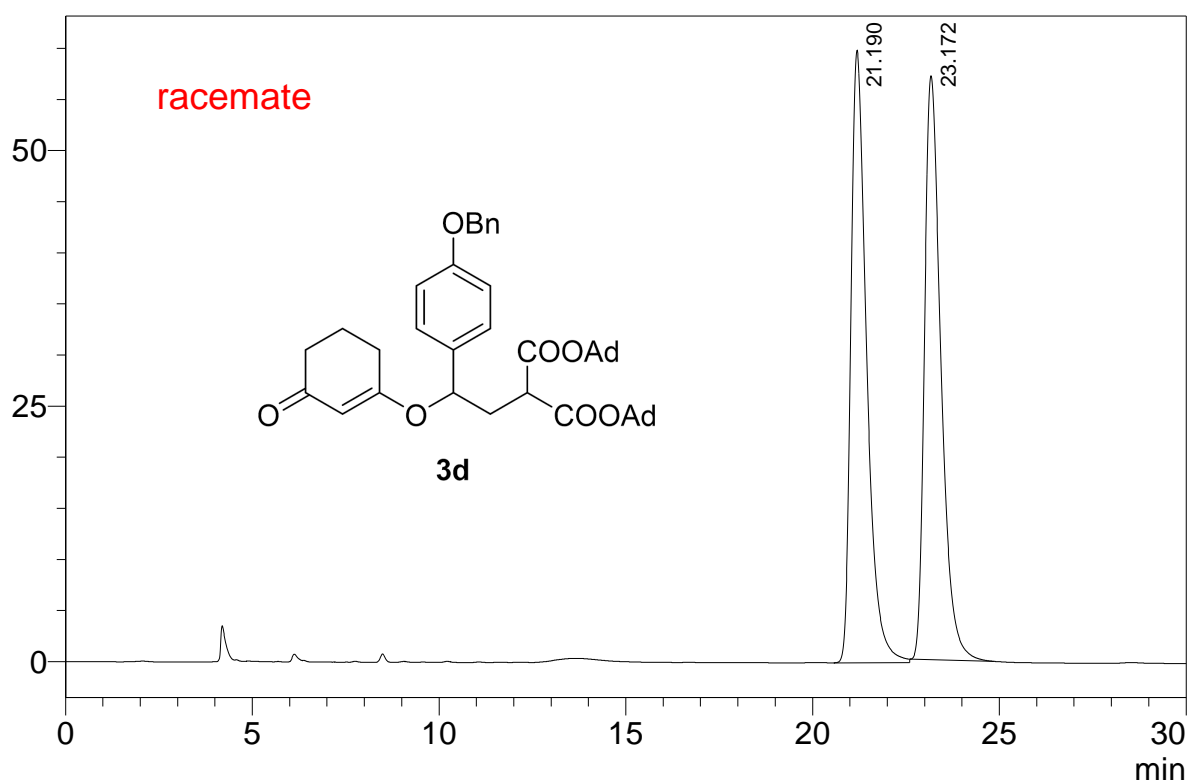

<Peak Table>

检测器A 254nm

| Peak# | Ret. Time | Area    | Height | Aera %  |
|-------|-----------|---------|--------|---------|
| 1     | 21.190    | 1762128 | 59929  | 50.195  |
| 2     | 23.172    | 1748410 | 57135  | 49.805  |
| 总计    |           | 3510538 | 117064 | 100.000 |



# ==== Analysis Report ====

Sample Name : yl-121chrrep  
 Sample ID :  
 Data Filename : yl-121chrrep-001.lcd  
 Method Filename : ipa\_hex5\_95\_254\_30min.lcm  
 Batch Filename :  
 Vial # : 2-21  
 Injection Volume : 10 uL  
 Date Acquired : 2019/12/6 11:05:38  
 Date Processed : 2019/12/6 11:41:17  
 Acquired by : System Administrator  
 Processed by : System Administrator

## <Chromatogram>

mV

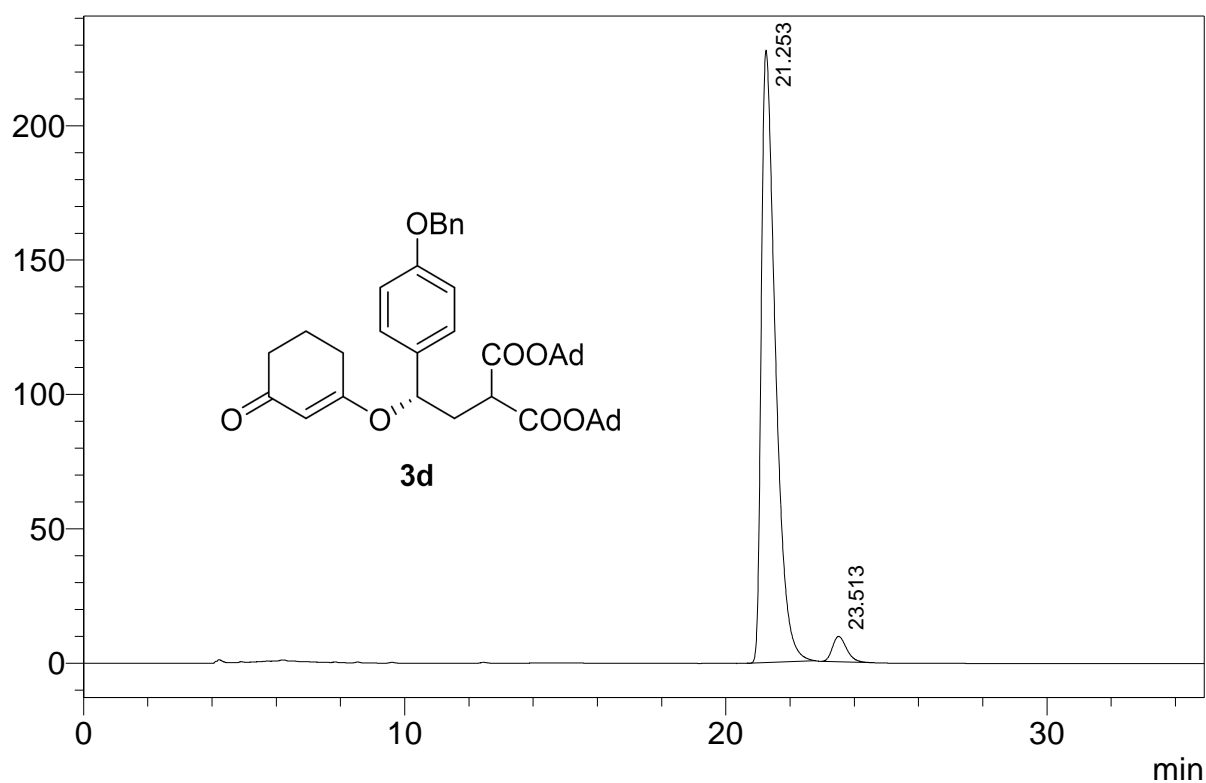

## <Peak Table>

检测器A 254nm

| Peak# | Ret. Time | Area    | Height | Aera %  |
|-------|-----------|---------|--------|---------|
| 1     | 21.253    | 6979721 | 227904 | 96.026  |
| 2     | 23.513    | 288853  | 9437   | 3.974   |
| 总计    |           | 7268574 | 237341 | 100.000 |

# ==== Analysis Report ====

Sample Name : yl-120-rac  
 Sample ID :  
 Data Filename : yl-120-rac-001.lcd  
 Method Filename : ipa\_hex5\_95\_254\_30min.lcm  
 Batch Filename :  
 Vial # : 1-40  
 Injection Volume : 10 uL  
 Date Acquired : 2019/11/1 21:08:46  
 Date Processed : 2019/11/1 21:24:47  
 Acquired by : System Administrator  
 Processed by : System Administrator

## <Chromatogram>

mV

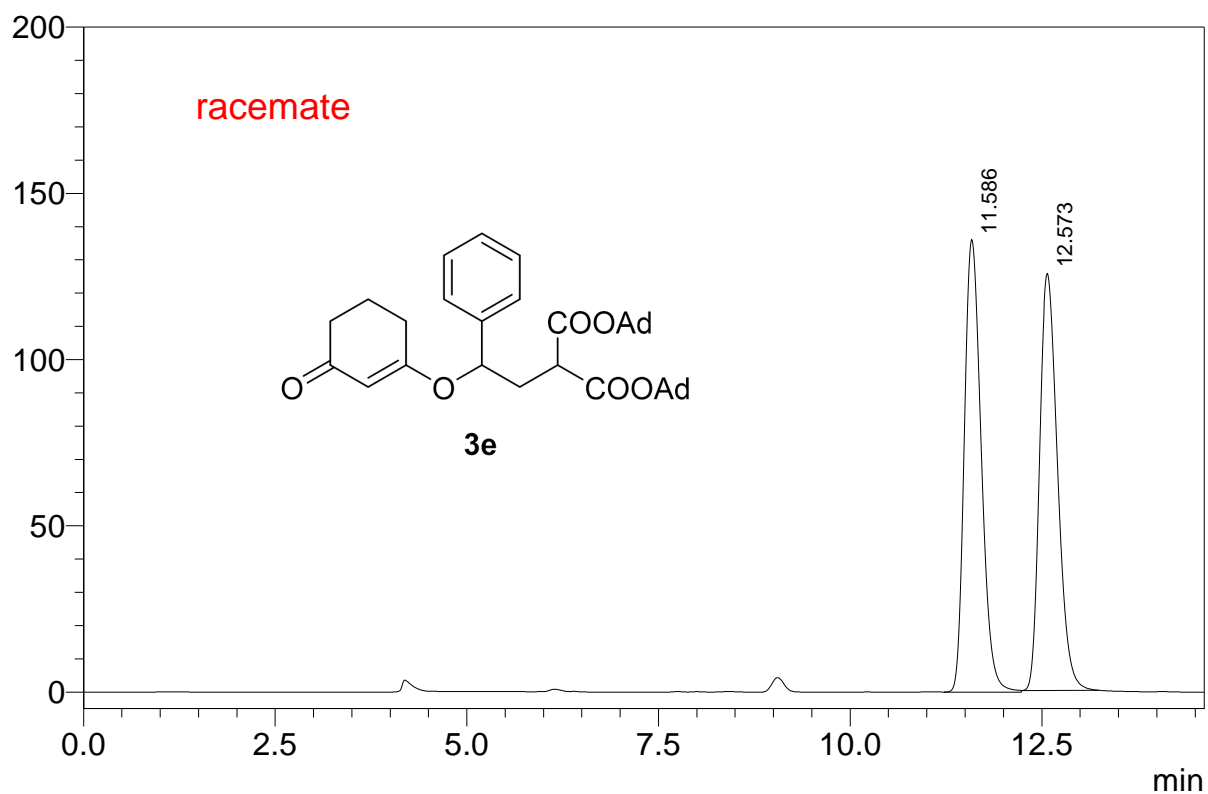

## <Peak Table>

检测器A 254nm

| Peak# | Ret. Time | Area    | Height | Aera %  |
|-------|-----------|---------|--------|---------|
| 1     | 11.586    | 2086705 | 136150 | 50.304  |
| 2     | 12.573    | 2061444 | 125382 | 49.696  |
| 总计    |           | 4148149 | 261532 | 100.000 |

# ==== Analysis Report ====

Sample Name : yl-120  
Sample ID :  
Data Filename : yl-120chr -005.lcd  
Method Filename : ipa\_hex5\_95\_254\_30min.lcm  
Batch Filename :  
Vial # : 2-3  
Injection Volume : 10 uL  
Date Acquired : 2019/11/15 15:59:12  
Date Processed : 2019/12/5 22:16:49  
Acquired by : System Administrator  
Processed by : System Administrator

## <Chromatogram>

mV

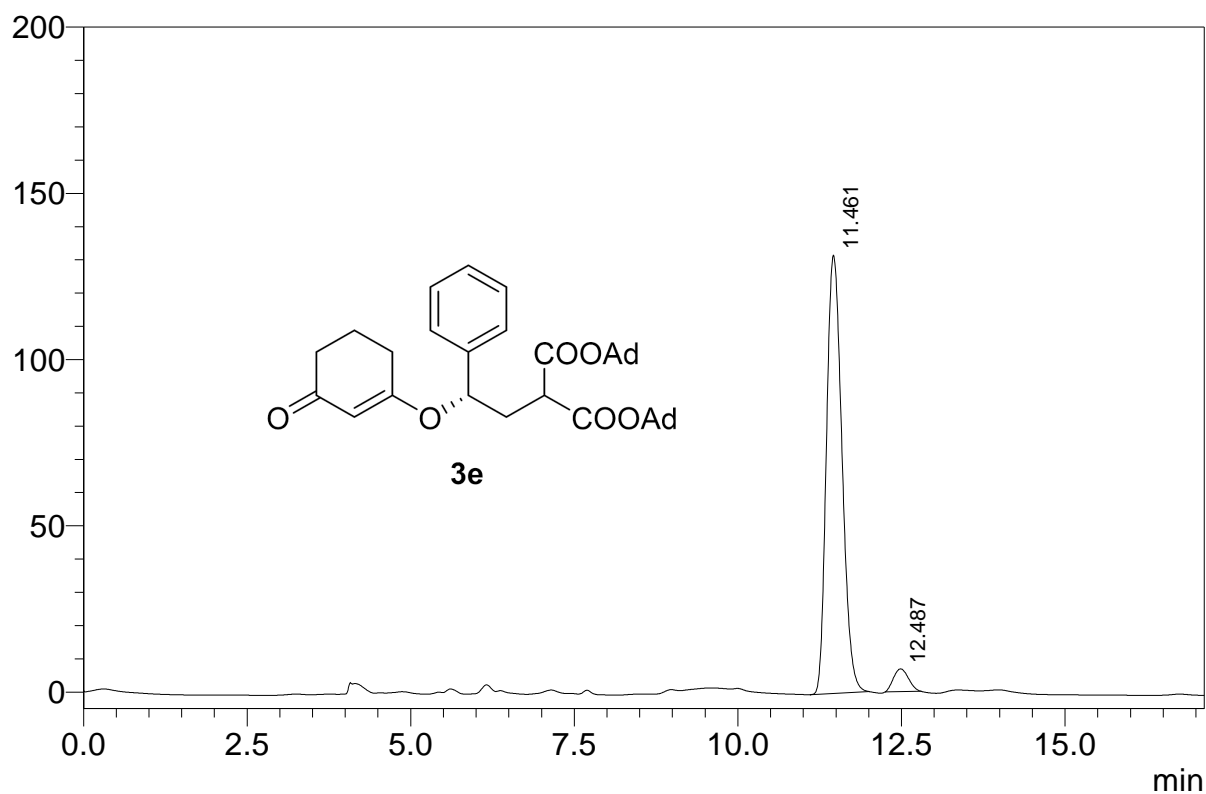

## <Peak Table>

检测器A 254nm

| Peak# | Ret. Time | Area    | Height | Aera %  |
|-------|-----------|---------|--------|---------|
| 1     | 11.461    | 2174611 | 131769 | 95.203  |
| 2     | 12.487    | 109571  | 6840   | 4.797   |
| 总计    |           | 2284181 | 138609 | 100.000 |

# ==== Analysis Report ====

Sample Name : zjc-115rac  
 Sample ID :  
 Data Filename : zjc-115rac-001.lcd  
 Method Filename : ipa\_hex5\_95\_254\_30min.lcm  
 Batch Filename :  
 Vial # : 1-43  
 Injection Volume : 10 uL  
 Date Acquired : 2019/11/2 10:35:59  
 Date Processed : 2019/11/2 11:29:02  
 Acquired by : System Administrator  
 Processed by : System Administrator

## <Chromatogram>

mV

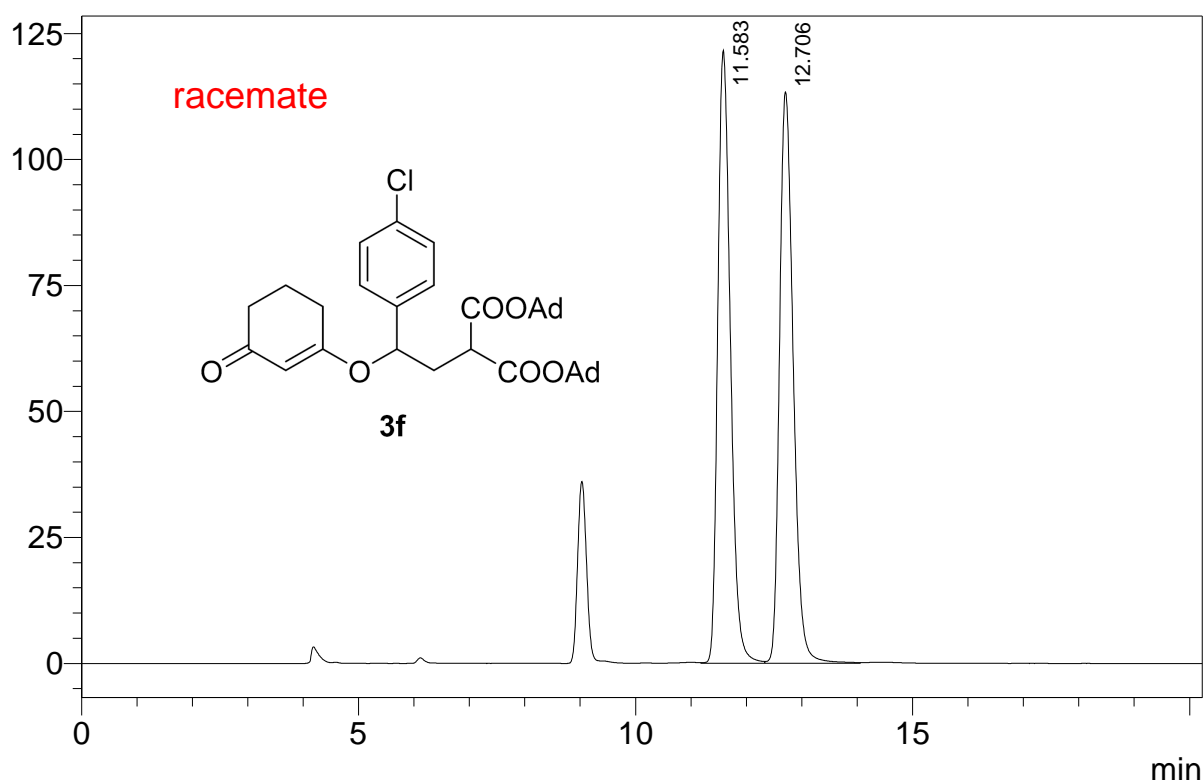

## <Peak Table>

检测器A 254nm

| Peak# | Ret. Time | Area    | Height | Aera %  |
|-------|-----------|---------|--------|---------|
| 1     | 11.583    | 1932319 | 121644 | 49.766  |
| 2     | 12.706    | 1950471 | 113405 | 50.234  |
| 总计    |           | 3882791 | 235049 | 100.000 |

# ==== Analysis Report ====

Sample Name : zjc-115 chro  
 Sample ID :  
 Data Filename : zjc-115 chro001.lcd  
 Method Filename : ipa\_hex5\_95\_254\_30min.lcm  
 Batch Filename :  
 Vial # : 2-10  
 Injection Volume : 10 uL  
 Date Acquired : 2019/12/13 20:55:48  
 Date Processed : 2019/12/13 21:18:30  
 Acquired by : System Administrator  
 Processed by : System Administrator

## <Chromatogram>

mV

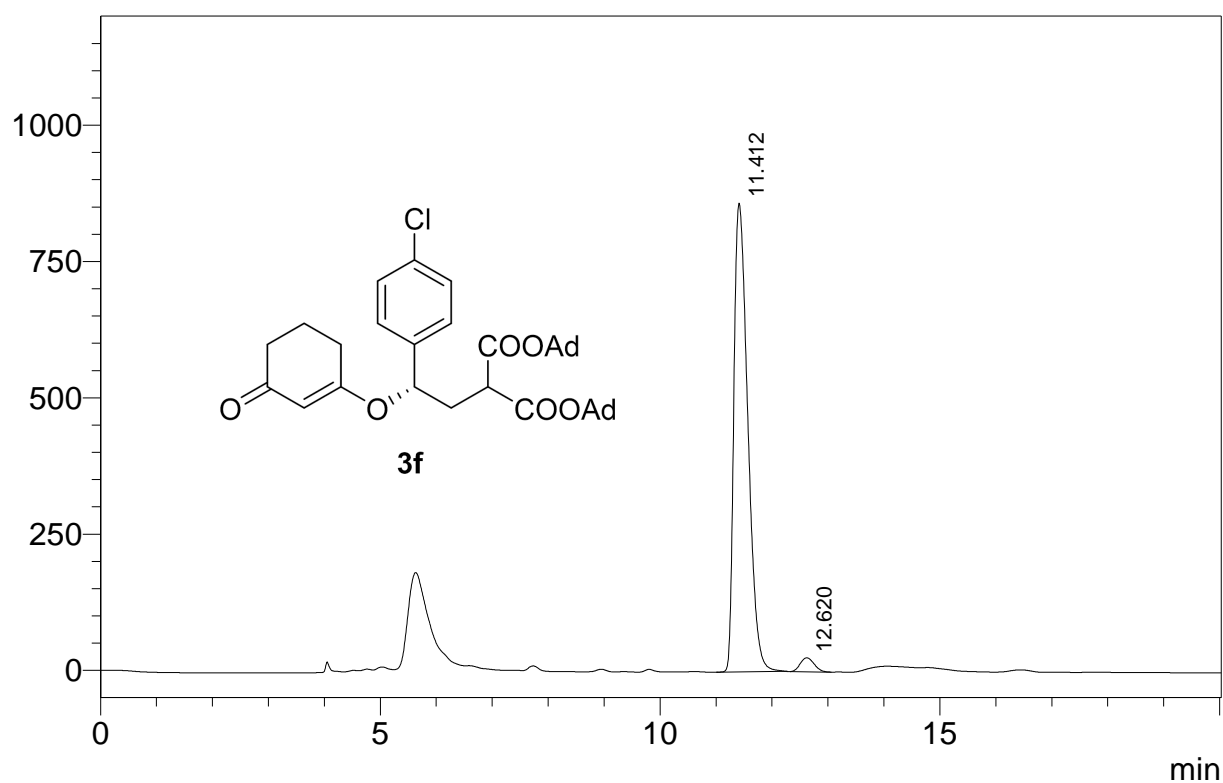

## <Peak Table>

检测器A 254nm

| Peak# | Ret. Time | Area     | Height | Aera %  |
|-------|-----------|----------|--------|---------|
| 1     | 11.412    | 14856327 | 859897 | 97.118  |
| 2     | 12.620    | 440873   | 25520  | 2.882   |
| 总计    |           | 15297200 | 885417 | 100.000 |

# ==== Analysis Report ====

Sample Name : yl-166rac  
 Sample ID :  
 Data Filename : yl-166rac001.lcd  
 Method Filename : ipa\_hex5\_95\_254\_30min.lcm  
 Batch Filename :  
 Vial # : 2-47  
 Injection Volume : 10 uL  
 Date Acquired : 2019/12/31 20:03:11  
 Date Processed : 2019/12/31 20:22:31  
 Acquired by : System Administrator  
 Processed by : System Administrator

<Chromatogram>

mV

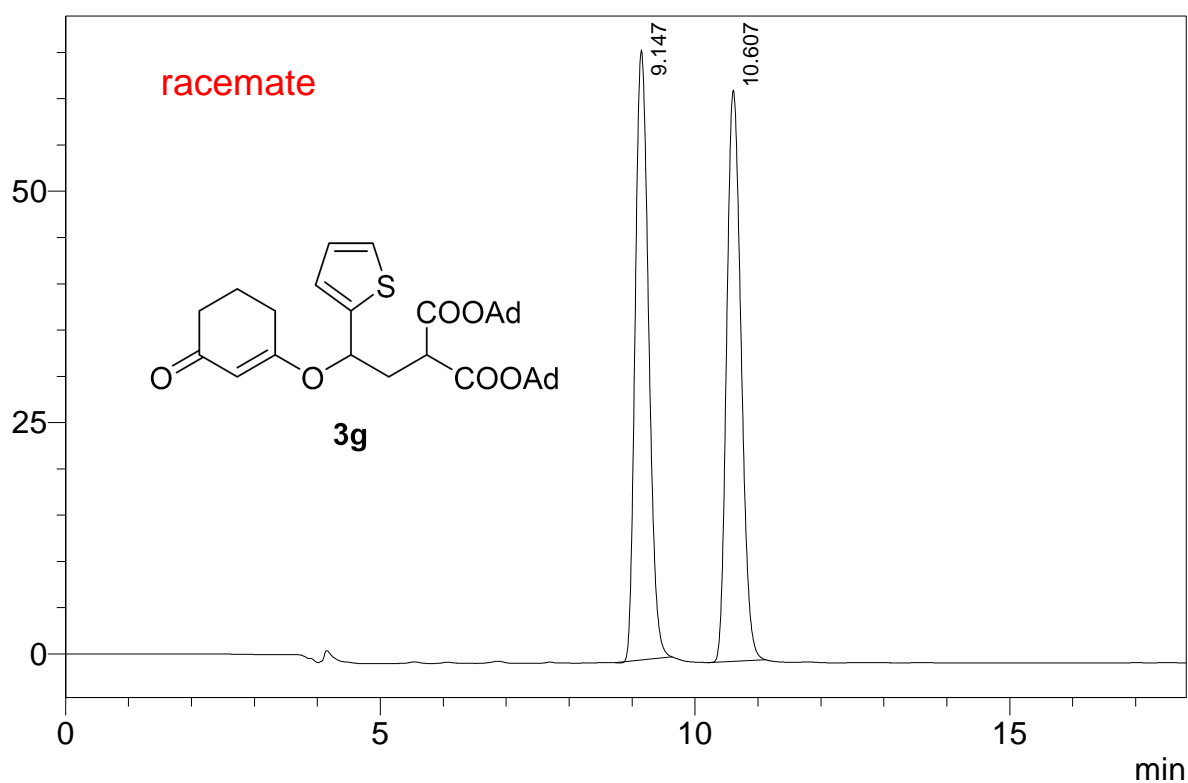

<Peak Table>

检测器A 254nm

| Peak# | Ret. Time | Area    | Height | Aera %  |
|-------|-----------|---------|--------|---------|
| 1     | 9.147     | 980348  | 65889  | 49.892  |
| 2     | 10.607    | 984610  | 61715  | 50.108  |
| 总计    |           | 1964958 | 127604 | 100.000 |

# ==== Analysis Report ====

Sample Name : yl-166chr  
 Sample ID :  
 Data Filename : yl-166chr001.lcd  
 Method Filename : ipa\_hex5\_95\_254\_30min.lcm  
 Batch Filename :  
 Vial # : 2-46  
 Injection Volume : 10 uL  
 Date Acquired : 2019/12/31 19:32:29  
 Date Processed : 2019/12/31 19:52:55  
 Acquired by : System Administrator  
 Processed by : System Administrator

## <Chromatogram>

mV

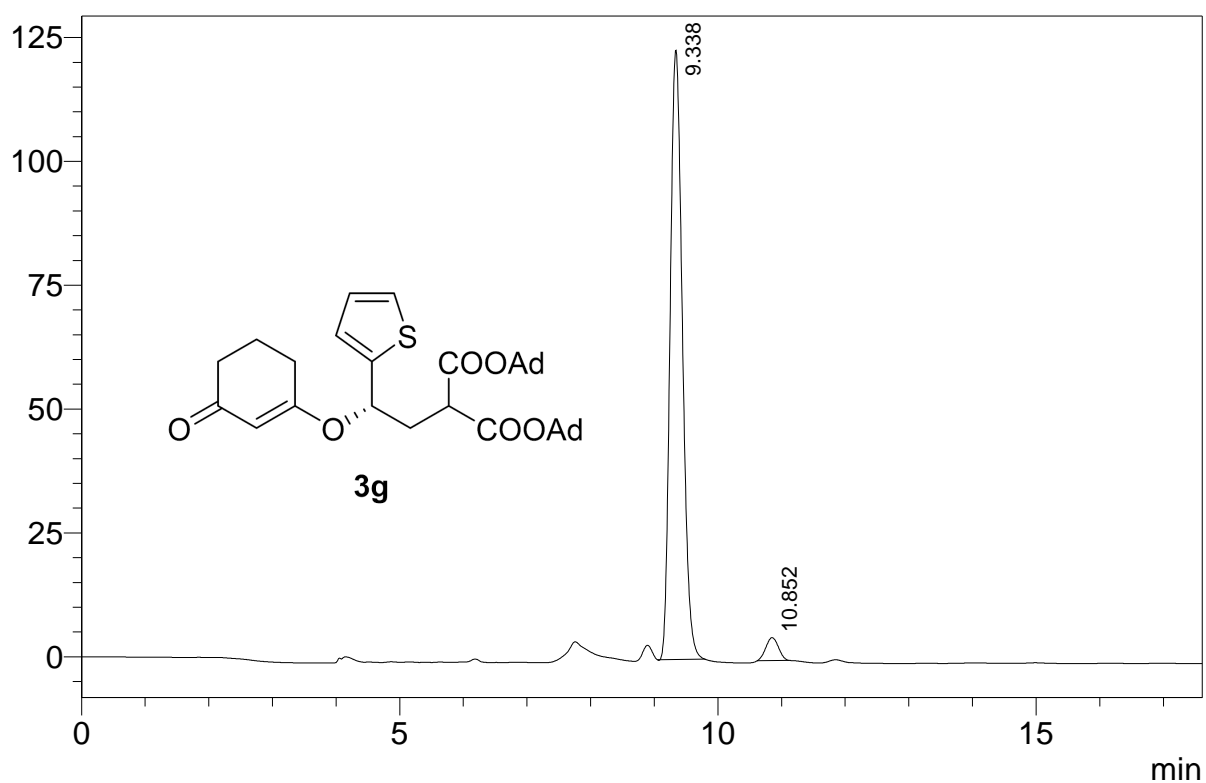

## <Peak Table>

检测器A 254nm

| Peak# | Ret. Time | Area    | Height | Aera %  |
|-------|-----------|---------|--------|---------|
| 1     | 9.338     | 1647512 | 122994 | 96.276  |
| 2     | 10.852    | 63730   | 4617   | 3.724   |
| 总计    |           | 1711242 | 127612 | 100.000 |

# ==== Analysis Report ====

Sample Name : yl-169rac  
Sample ID :  
Data Filename : yl-169rac002.lcd  
Method Filename : ipa\_hex\_2\_98\_254.lcm  
Batch Filename :  
Vial # : 2-49  
Injection Volume : 10 uL  
Date Acquired : 2020/1/3 21:43:45  
Date Processed : 2020/1/3 22:09:32  
Acquired by : System Administrator  
Processed by : System Administrator

<Chromatogram>

mV

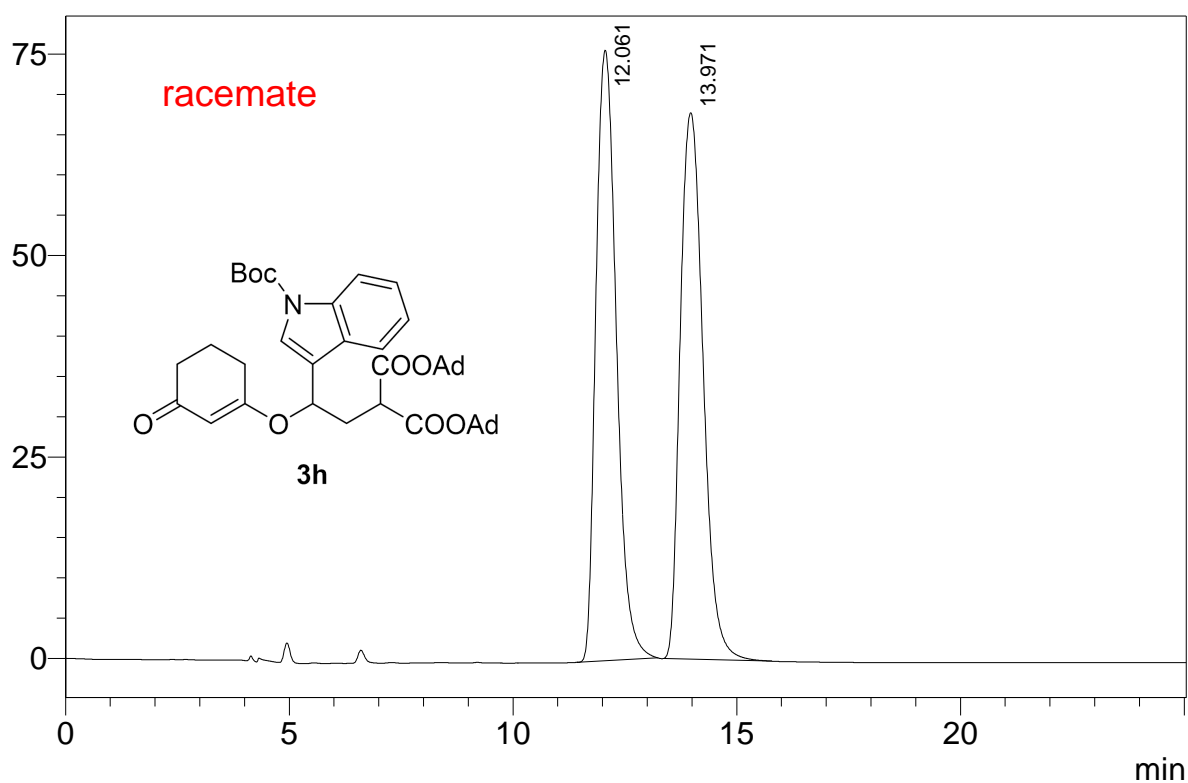

<Peak Table>

检测器A 254nm

| Peak# | Ret. Time | Area    | Height | Aera %  |
|-------|-----------|---------|--------|---------|
| 1     | 12.061    | 2409414 | 75752  | 49.976  |
| 2     | 13.971    | 2411764 | 67805  | 50.024  |
| 总计    |           | 4821177 | 143556 | 100.000 |



# ==== Analysis Report ====

Sample Name : yl-169chr  
 Sample ID :  
 Data Filename : yl-169chr002.lcd  
 Method Filename : ipa\_hex\_2\_98\_254.lcm  
 Batch Filename :  
 Vial # : 2-50  
 Injection Volume : 10 uL  
 Date Acquired : 2020/1/6 19:48:14  
 Date Processed : 2020/1/6 20:13:27  
 Acquired by : System Administrator  
 Processed by : System Administrator

## <Chromatogram>

mV

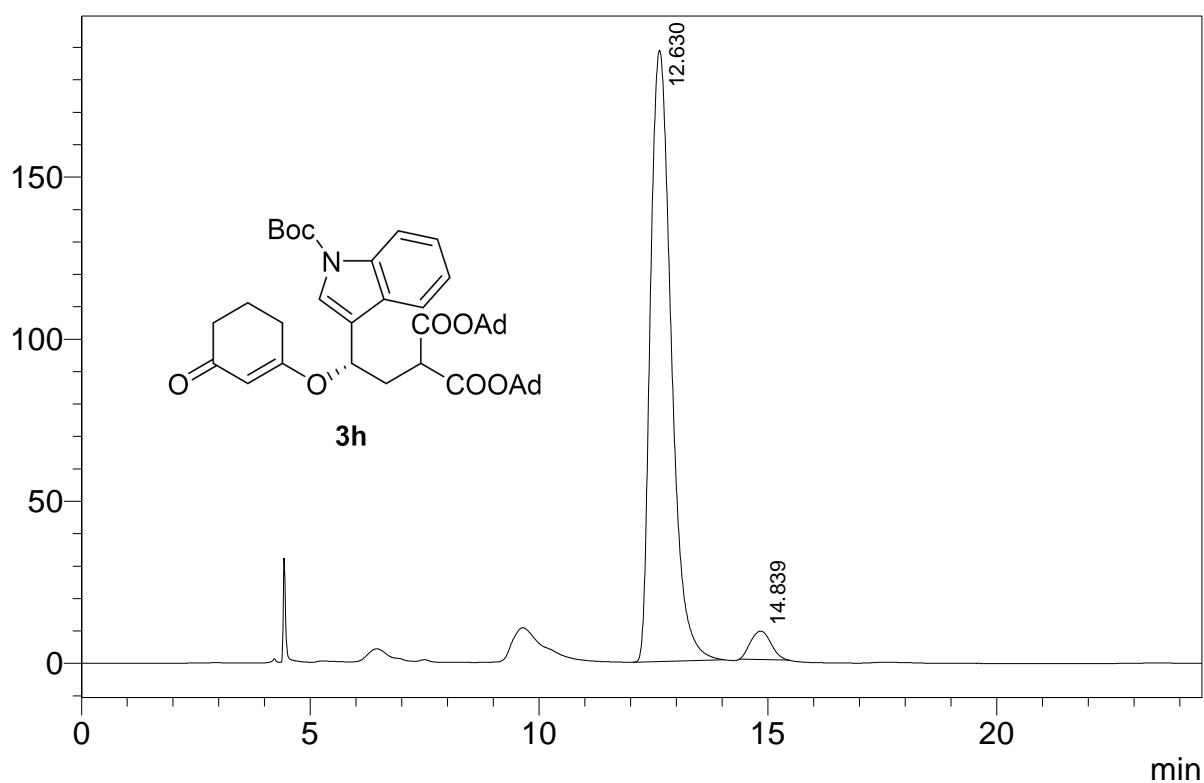

## <Peak Table>

检测器A 254nm

| Peak# | Ret. Time | Area    | Height | Aera %  |
|-------|-----------|---------|--------|---------|
| 1     | 12.630    | 5959028 | 188581 | 95.619  |
| 2     | 14.839    | 273000  | 8774   | 4.381   |
| 总计    |           | 6232029 | 197355 | 100.000 |

# ==== Analysis Report ====

Sample Name : yl-143rac  
Sample ID :  
Data Filename : yl-143rac003.lcd  
Method Filename : ipa\_hex\_2\_98\_254.lcm  
Batch Filename :  
Vial # : 2-38  
Injection Volume : 10 uL  
Date Acquired : 2019/12/20 21:08:56  
Date Processed : 2019/12/20 21:40:02  
Acquired by : System Administrator  
Processed by : System Administrator

<Chromatogram>

mV

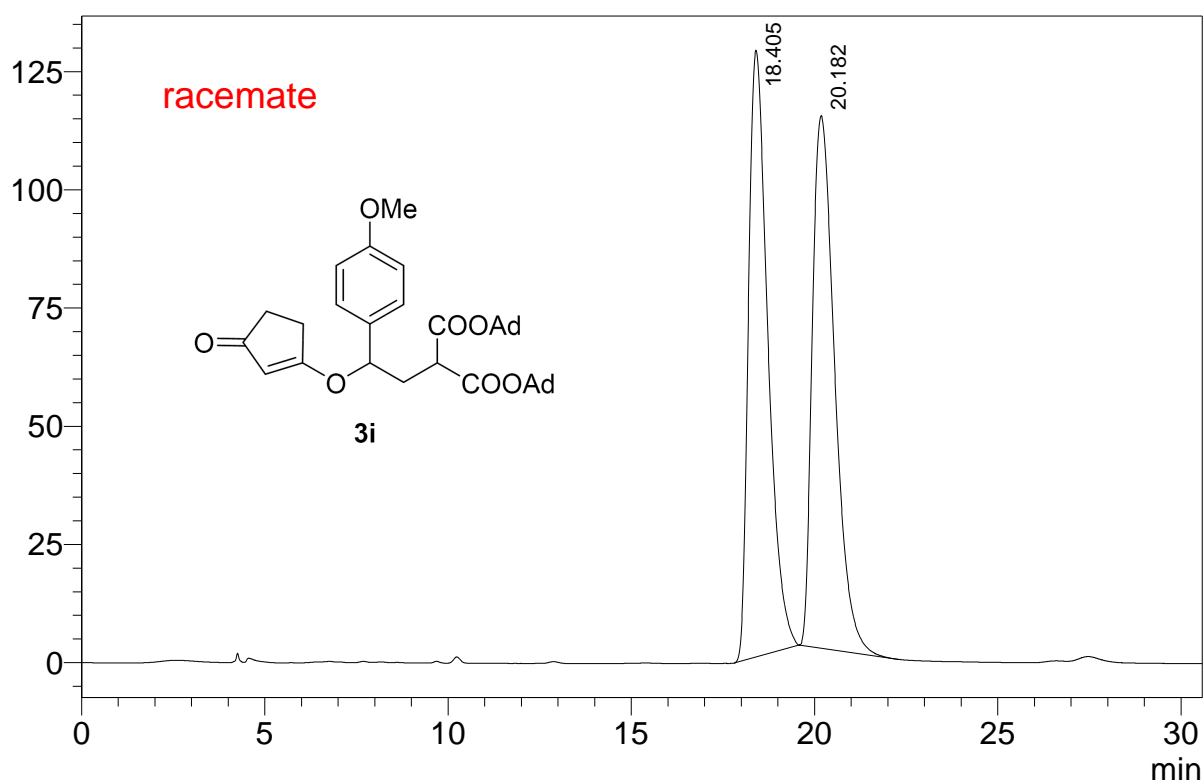

<Peak Table>

检测器A 254nm

| Peak# | Ret. Time | Area    | Height | Aera %  |
|-------|-----------|---------|--------|---------|
| 1     | 18.405    | 4722076 | 128303 | 49.665  |
| 2     | 20.182    | 4785861 | 112643 | 50.335  |
| 总计    |           | 9507937 | 240945 | 100.000 |

# ==== Analysis Report ====

Sample Name : yl-143chr  
 Sample ID :  
 Data Filename : yl-143chr002.lcd  
 Method Filename : ipa\_hex\_2\_98\_254.lcm  
 Batch Filename :  
 Vial # : 2-37  
 Injection Volume : 10 uL  
 Date Acquired : 2019/12/20 20:37:24  
 Date Processed : 2019/12/20 21:10:23  
 Acquired by : System Administrator  
 Processed by : System Administrator

## <Chromatogram>

mV

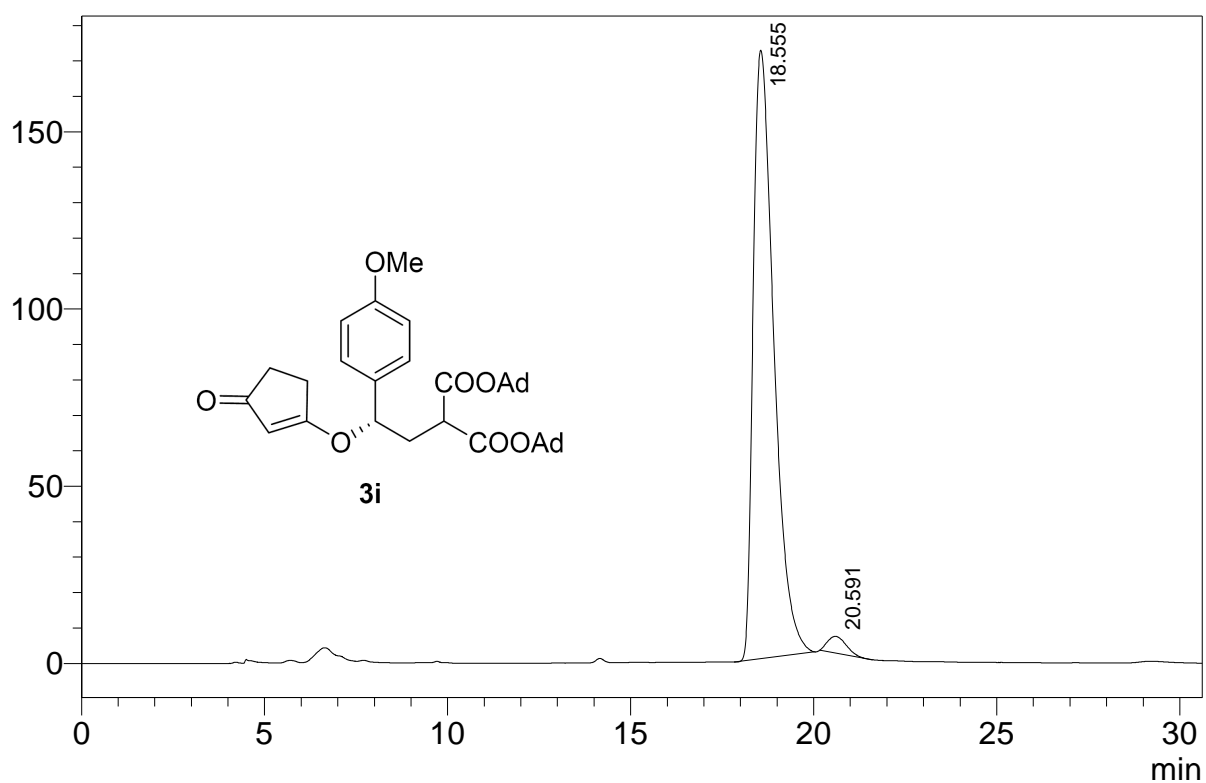

## <Peak Table>

检测器A 254nm

| Peak# | Ret. Time | Area    | Height | Aera %  |
|-------|-----------|---------|--------|---------|
| 1     | 18.555    | 6724876 | 171663 | 97.575  |
| 2     | 20.591    | 167140  | 4694   | 2.425   |
| 总计    |           | 6892016 | 176357 | 100.000 |

# ==== Analysis Report ====

Sample Name : yl-164rac  
 Sample ID :  
 Data Filename : yl-164rac001.lcd  
 Method Filename : ipa\_hex20\_80\_254\_25min.lcm  
 Batch Filename :  
 Vial # : 1-30  
 Injection Volume : 10 uL  
 Date Acquired : 2020/1/13 16:22:13  
 Date Processed : 2020/1/13 16:39:59  
 Acquired by : System Administrator  
 Processed by : System Administrator

<Chromatogram>

mV

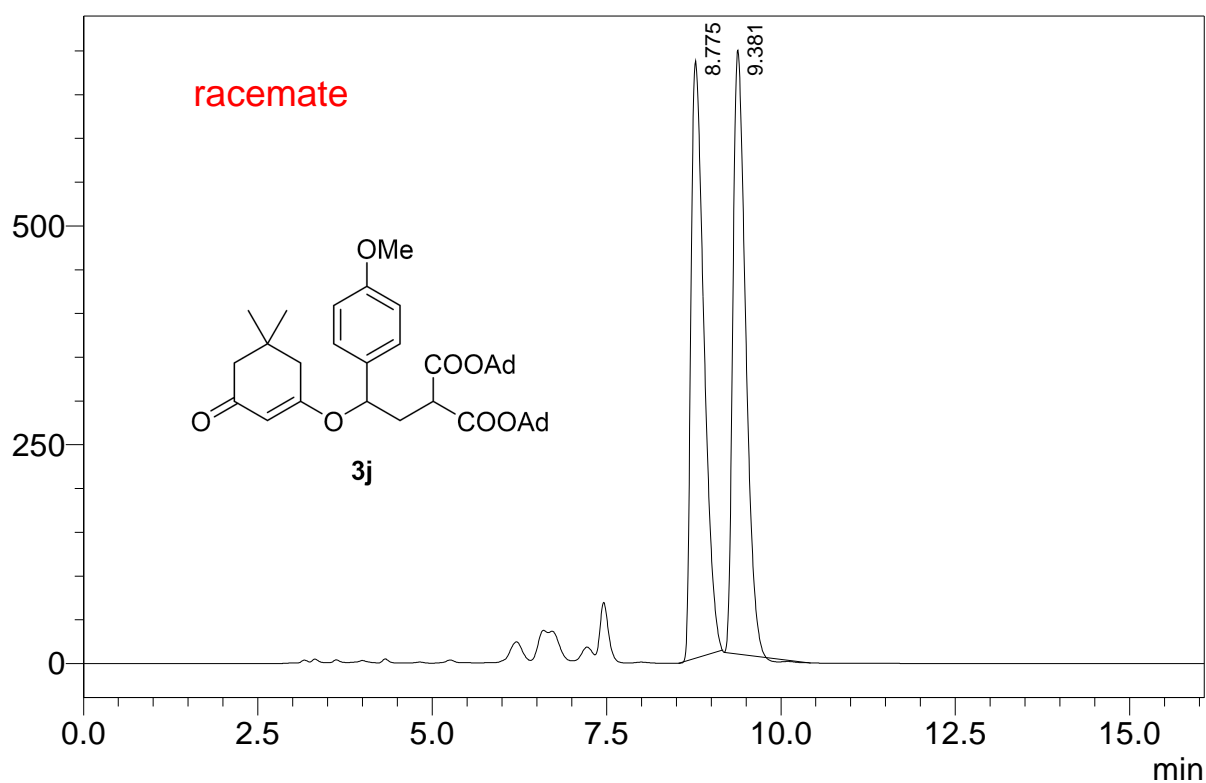

<Peak Table>

检测器A 254nm

| Peak# | Ret. Time | Area     | Height  | Aera %  |
|-------|-----------|----------|---------|---------|
| 1     | 8.775     | 8907799  | 682442  | 50.273  |
| 2     | 9.381     | 8811219  | 690041  | 49.727  |
| 总计    |           | 17719018 | 1372483 | 100.000 |

# ==== Analysis Report ====

Sample Name : yl-164chr  
 Sample ID :  
 Data Filename : yl-164chr001.lcd  
 Method Filename : ipa\_hex20\_80\_254\_25min.lcm  
 Batch Filename :  
 Vial # : 1-31  
 Injection Volume : 10 uL  
 Date Acquired : 2020/1/13 16:39:15  
 Date Processed : 2020/1/13 16:57:40  
 Acquired by : System Administrator  
 Processed by : System Administrator

## <Chromatogram>

mV

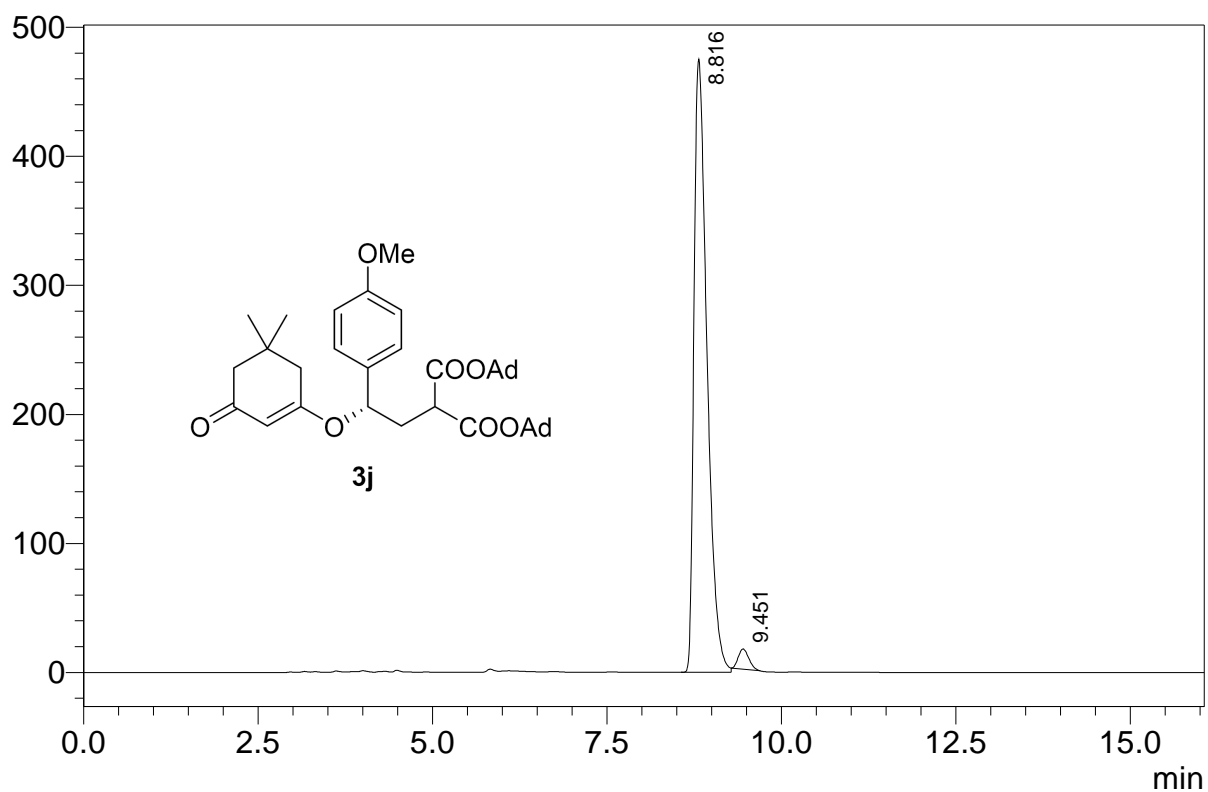

## <Peak Table>

检测器A 254nm

| Peak# | Ret. Time | Area    | Height | Aera %  |
|-------|-----------|---------|--------|---------|
| 1     | 8.816     | 6189399 | 475119 | 97.432  |
| 2     | 9.451     | 163128  | 15611  | 2.568   |
| 总计    |           | 6352528 | 490730 | 100.000 |

# ==== Analysis Report ====

Sample Name : yl-119-rac  
Sample ID :  
Data Filename : yl-119-rac-001.lcd  
Method Filename : ipa\_hex5\_95\_254\_30min.lcm  
Batch Filename :  
Vial # : 1-38  
Injection Volume : 10 uL  
Date Acquired : 2019/11/1 20:32:18  
Date Processed : 2020/6/30 13:58:56  
Acquired by : System Administrator  
Processed by : System Administrator

<Chromatogram>

mV

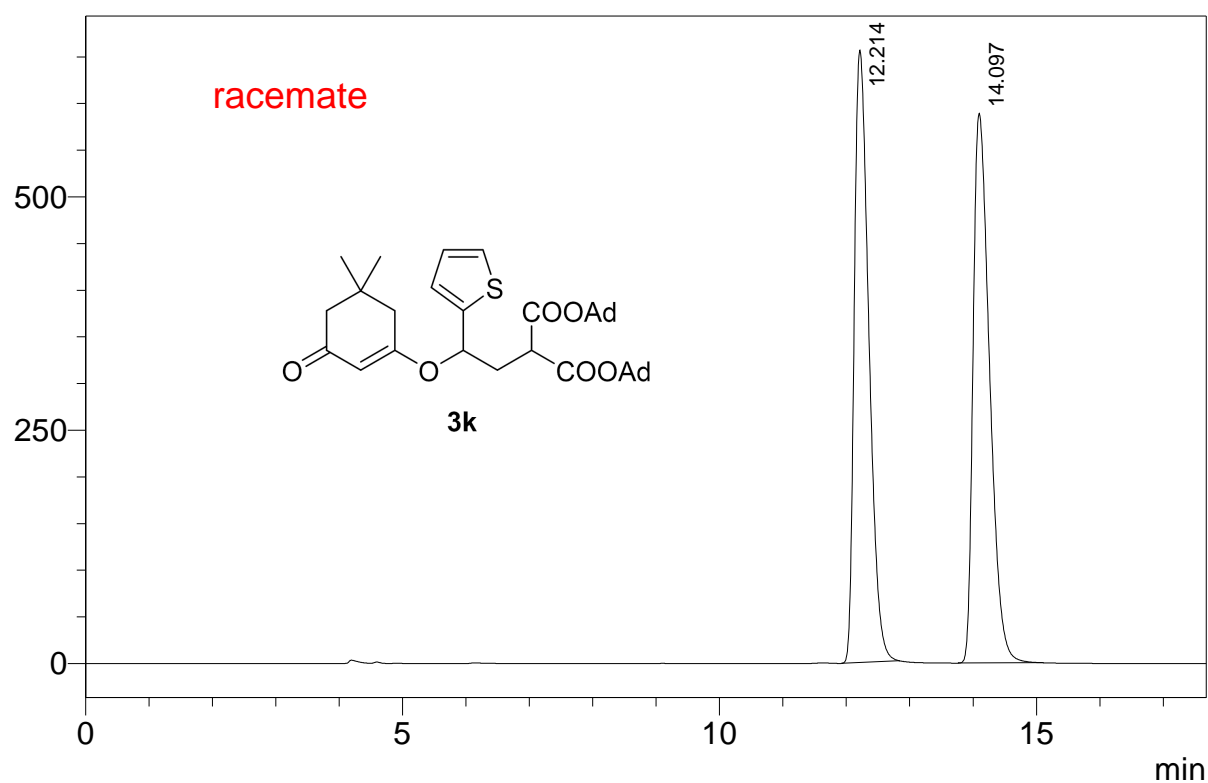

<Peak Table>

检测器A 254nm

| Peak# | Ret. Time | Area     | Height  | Aera %  |
|-------|-----------|----------|---------|---------|
| 1     | 12.214    | 10530435 | 656027  | 49.720  |
| 2     | 14.097    | 10648908 | 588907  | 50.280  |
| 总计    |           | 21179343 | 1244934 | 100.000 |

# ==== Analysis Report ====

Sample Name : yl-119chrrep  
Sample ID :  
Data Filename : yl-119chrrep-001.lcd  
Method Filename : ipa\_hex5\_95\_254\_30min.lcm  
Batch Filename :  
Vial # : 2-20  
Injection Volume : 10 uL  
Date Acquired : 2019/12/6 10:45:01  
Date Processed : 2020/6/30 14:01:45  
Acquired by : System Administrator  
Processed by : System Administrator

## <Chromatogram>

mV

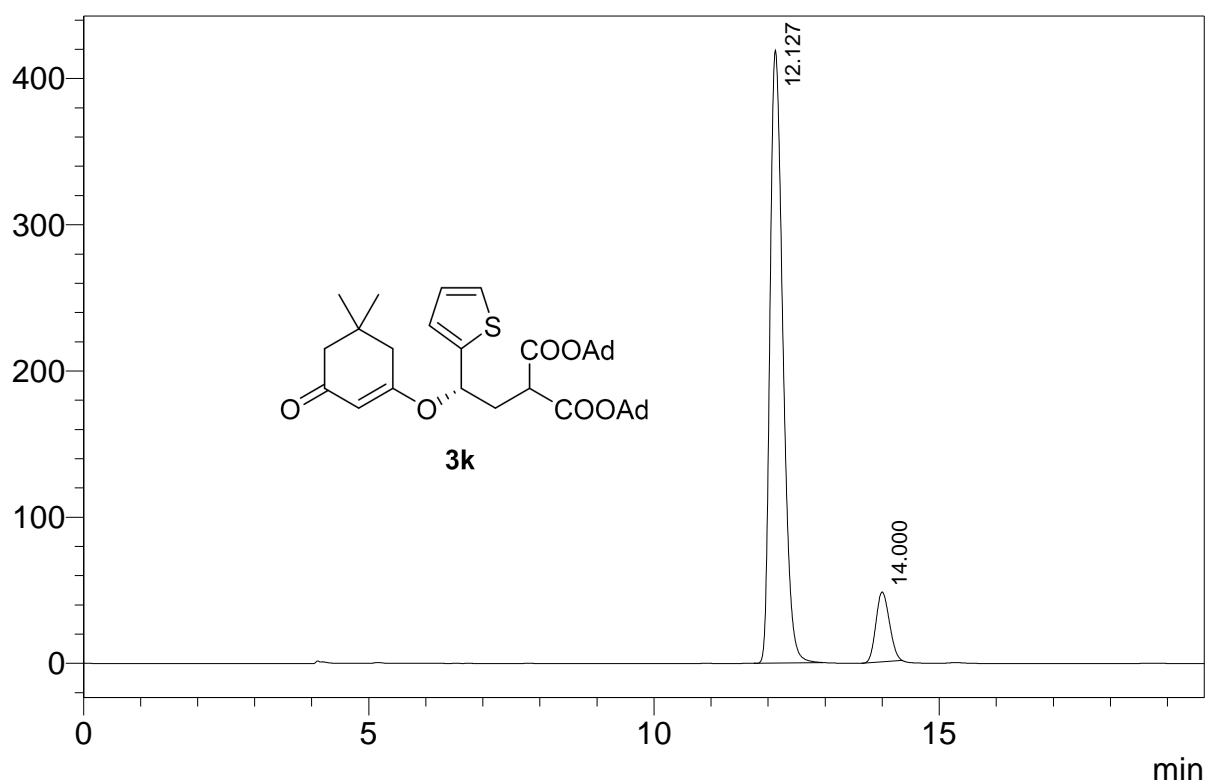

## <Peak Table>

检测器A 254nm

| Peak# | Ret. Time | Area    | Height | Aera %  |
|-------|-----------|---------|--------|---------|
| 1     | 12.127    | 6589294 | 419161 | 89.339  |
| 2     | 14.000    | 786331  | 47812  | 10.661  |
| 总计    |           | 7375625 | 466972 | 100.000 |

# ==== Analysis Report ====

Sample Name : yl-163rac  
 Sample ID :  
 Data Filename : yl-163rac002.lcd  
 Method Filename : ipa\_hex5\_95\_254\_30min.lcm  
 Batch Filename :  
 Vial # : 2-39  
 Injection Volume : 10 uL  
 Date Acquired : 2019/12/27 11:10:17  
 Date Processed : 2019/12/27 11:31:32  
 Acquired by : System Administrator  
 Processed by : System Administrator

## <Chromatogram>

mV

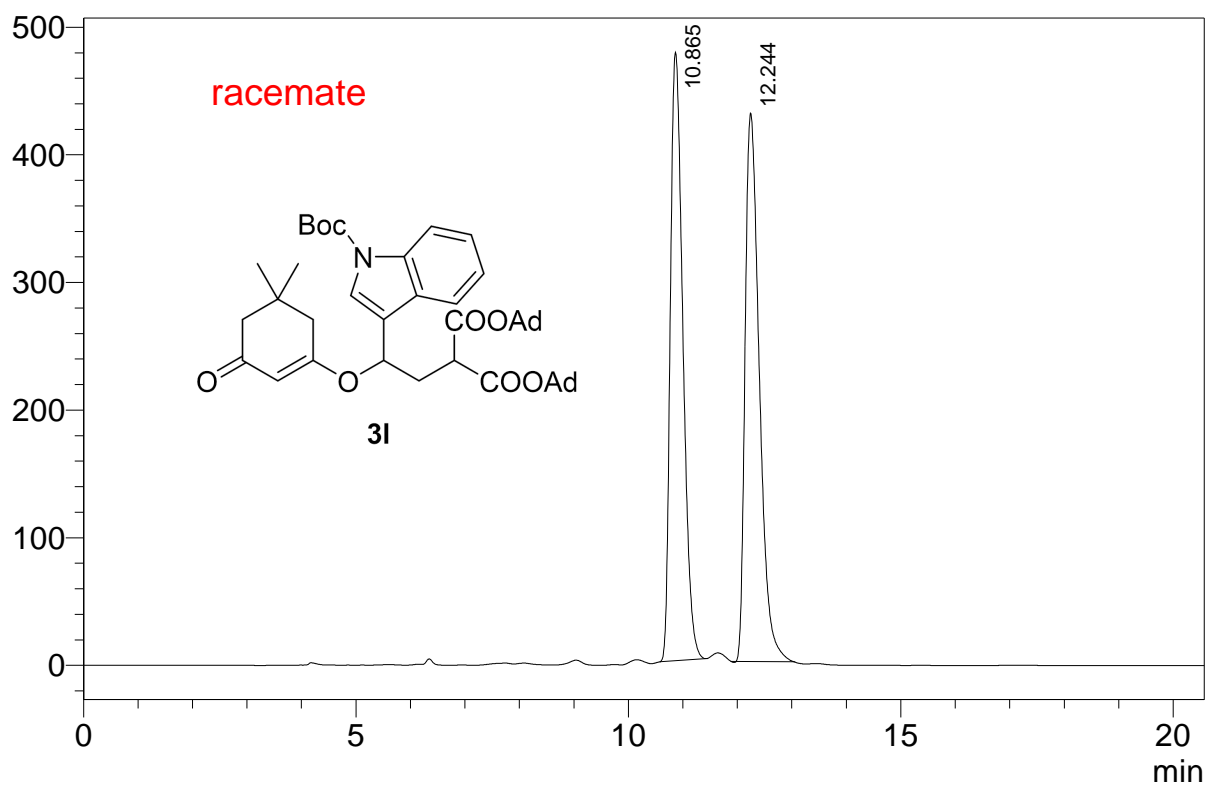

## <Peak Table>

检测器A 254nm

| Peak# | Ret. Time | Area     | Height | Aera %  |
|-------|-----------|----------|--------|---------|
| 1     | 10.865    | 7641712  | 476783 | 49.434  |
| 2     | 12.244    | 7816599  | 429673 | 50.566  |
| 总计    |           | 15458311 | 906455 | 100.000 |



# ==== Analysis Report ====

Sample Name : yl-163chr  
 Sample ID :  
 Data Filename : yl-163chr002.lcd  
 Method Filename : ipa\_hex5\_95\_254\_30min.lcm  
 Batch Filename :  
 Vial # : 2-40  
 Injection Volume : 10 uL  
 Date Acquired : 2019/12/27 10:49:19  
 Date Processed : 2019/12/27 11:10:45  
 Acquired by : System Administrator  
 Processed by : System Administrator

## <Chromatogram>

mV

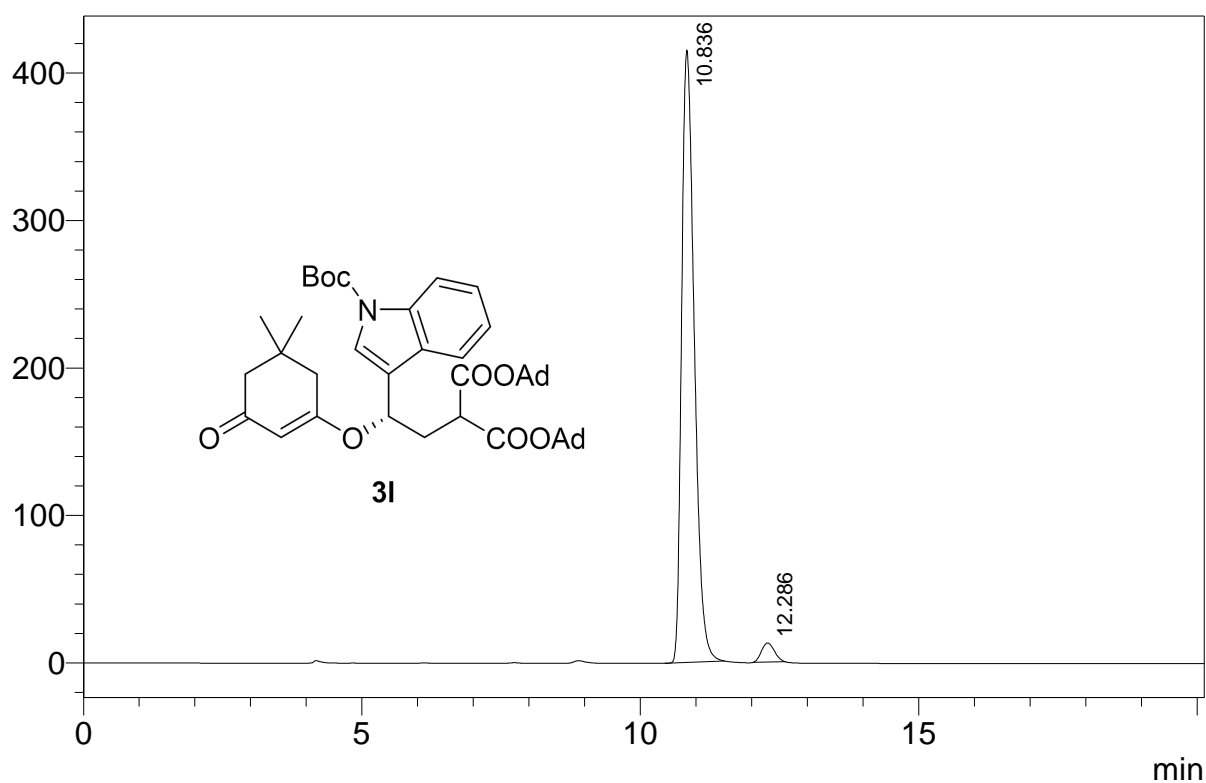

## <Peak Table>

检测器A 254nm

| Peak# | Ret. Time | Area    | Height | Aera %  |
|-------|-----------|---------|--------|---------|
| 1     | 10.836    | 6563146 | 415117 | 96.946  |
| 2     | 12.286    | 206745  | 12897  | 3.054   |
| 总计    |           | 6769891 | 428015 | 100.000 |
